# Supplementary material for: Mean ocean temperature change and decomposition of the benthic δ 18 O record over the past 4.5 million years
Source: Copernicus journal article supplement (doi:10.5194/cp-21-973-2025), 2025-06-03
Supplement: Supplementary file 4 [file cp-21-973-2025-supplement.zip]

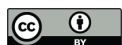

## *Supplement of*

# **Mean ocean temperature change and decomposition of the benthic $\delta^{18}\text{O}$ record over the past 4.5 million years**

**Peter U. Clark et al.**

*Correspondence to:* Peter U. Clark ([clarkp@onid.orst.edu](mailto:clarkp@onid.orst.edu))

- [cp-21-973-2025-supplement-title-page.pdf](#)
- [Clark\\_MOT\\_Draft\\_SM\\_v3.docx](#)
- [Figure S1.pdf](#)
- [Figure S2.pdf](#)
- [Figure S3.pdf](#)
- [Table S1.xlsx](#)
- [Table S2.xlsx](#)

The copyright of individual parts of the supplement might differ from the article licence.
