# Supplementary material for: Mean ocean temperature change and decomposition of the benthic δ 18 O record over the past 4.5 million years
Source: Copernicus journal article supplement (doi:10.5194/cp-21-973-2025), 2025-06-03
Supplement: Supplementary file 4 [file Table S1.xlsx]

## Sheet: Sheet1
Table S1: Mean ocean temperature
Age (Ma)	Mean ocean temperature (oC)	Mean ocean temperature (oC) 1 sigma
0	0	0.221853
0.001	-0.26	0.190111
0.002	-0.15	0.138625
0.003	-0.07	0.109992
0.004	-0.17	0.152425
0.005	-0.16	0.226701
0.006	-0.22	0.232824
0.007	-0.11	0.245075
0.008	-0.19	0.295097
0.009	-0.31	0.339167
0.01	-0.66	0.40428
0.011	-0.89	0.39276
0.012	-1.37	0.371304
0.013	-1.81	0.389626
0.014	-2.08	0.378751
0.015	-2.48	0.430979
0.016	-2.79	0.543132
0.017	-2.96	0.626549
0.018	-3.06	0.605748
0.019	-3.28	0.582977
0.02	-3.26	0.524397
0.021	-3.18	0.557803
0.022	-3.22	0.591991
0.023	-3.33	0.591819
0.024	-3.3	0.532604
0.025	-3.31	0.460616
0.026	-3.4	0.5129
0.027	-3.43	0.570629
0.028	-3.25	0.519399
0.029	-3.13	0.325223
0.03	-3.27	0.343866
0.031	-3.26	0.369799
0.032	-3.05	0.326681
0.033	-3.11	0.35534
0.034	-3.13	0.302592
0.035	-3.05	0.276741
0.036	-3.19	0.279478
0.037	-3.29	0.31735
0.038	-3.23	0.340332
0.039	-3.33	0.381625
0.04	-3.21	0.312445
0.041	-3.2	0.314986
0.042	-3.15	0.294799
0.043	-2.99	0.270518
0.044	-3.03	0.258803
0.045	-2.98	0.284011
0.046	-3.14	0.308709
0.047	-3.16	0.259192
0.048	-3.07	0.297891
0.049	-2.88	0.248871
0.05	-2.84	0.2822
0.051	-2.72	0.277929
0.052	-2.77	0.270586
0.053	-2.85	0.293206
0.054	-2.76	0.304413
0.055	-2.74	0.306973
0.056	-2.73	0.29028
0.057	-2.78	0.310014
0.058	-2.94	0.312012
0.059	-2.99	0.285711
0.06	-3.11	0.309584
0.061	-3.07	0.327669
0.062	-3.15	0.285821
0.063	-3.28	0.453279
0.064	-3.14	0.404418
0.065	-3.11	0.483674
0.066	-3.15	0.474855
0.067	-3.01	0.408635
0.068	-2.89	0.364756
0.069	-2.8	0.329924
0.07	-2.66	0.366362
0.071	-2.51	0.392847
0.072	-2.42	0.409905
0.073	-2.14	0.368362
0.074	-2.01	0.341543
0.075	-1.81	0.351691
0.076	-1.75	0.361286
0.077	-1.78	0.308892
0.078	-1.75	0.344285
0.079	-1.54	0.314649
0.08	-1.29	0.296772
0.081	-1.22	0.275903
0.082	-1.2	0.300217
0.083	-1.2	0.294613
0.084	-1.29	0.357373
0.085	-1.41	0.356226
0.086	-1.42	0.357061
0.087	-1.55	0.356871
0.088	-1.52	0.356588
0.089	-1.46	0.384944
0.09	-1.34	0.387625
0.091	-1.3	0.388813
0.092	-1.2	0.400853
0.093	-1.14	0.385348
0.094	-1.09	0.417696
0.095	-1.02	0.415804
0.096	-0.86	0.403907
0.097	-0.78	0.462938
0.098	-0.73	0.378315
0.099	-0.75	0.419894
0.1	-0.59	0.431102
0.101	-0.66	0.429759
0.102	-0.64	0.423017
0.103	-0.6	0.407943
0.104	-0.53	0.362647
0.105	-0.66	0.366869
0.106	-0.82	0.391784
0.107	-1.04	0.381248
0.108	-1.12	0.361221
0.109	-1.03	0.336024
0.11	-1.12	0.346037
0.111	-1.08	0.40114
0.112	-0.86	0.370137
0.113	-0.85	0.412092
0.114	-0.8	0.43969
0.115	-0.8	0.480429
0.116	-0.7	0.481659
0.117	-0.5	0.393206
0.118	-0.3	0.383279
0.119	-0.2	0.364954
0.12	0	0.2936
0.121	0.2	0.302333
0.122	0.3	0.292553
0.123	0.4	0.32072
0.124	0.5	0.315006
0.125	0.5	0.329894
0.126	0.5	0.43554
0.127	0.5	0.44366
0.128	0.3	0.49175
0.129	0.1	0.666293
0.13	-0.4	0.695224
0.131	-1.15	0.613327
0.132	-1.37	0.613669
0.133	-1.66	0.639942
0.134	-1.87	0.60044
0.135	-2.07	0.546043
0.136	-2.12	0.452037
0.137	-2.25	0.427456
0.138	-2.36	0.413564
0.139	-2.48	0.361567
0.14	-2.45	0.390674
0.141	-2.45	0.38465
0.142	-2.52	0.511343
0.143	-2.52	0.593561
0.144	-2.66	0.648857
0.145	-2.55	0.536515
0.146	-2.45	0.437255
0.147	-2.54	0.487643
0.148	-2.57	0.4011
0.149	-2.54	0.374204
0.15	-2.64	0.442672
0.151	-2.57	0.417928
0.152	-2.49	0.372437
0.153	-2.61	0.503834
0.154	-2.91	0.564228
0.155	-3.03	0.579494
0.156	-3.01	0.567156
0.157	-3.2	0.560217
0.158	-3.14	0.549383
0.159	-3.02	0.49406
0.16	-2.72	0.443599
0.161	-2.51	0.423918
0.162	-2.72	0.416208
0.163	-2.69	0.347414
0.164	-2.59	0.329878
0.165	-2.59	0.382999
0.166	-2.65	0.489268
0.167	-2.78	0.428394
0.168	-2.89	0.445022
0.169	-2.5	0.382682
0.17	-2.43	0.304056
0.171	-2.36	0.280379
0.172	-2.5	0.407689
0.173	-2.44	0.400911
0.174	-2.5	0.432806
0.175	-2.54	0.546266
0.176	-2.36	0.602118
0.177	-2.39	0.643596
0.178	-2.46	0.560235
0.179	-2.27	0.444733
0.18	-2.24	0.412541
0.181	-2.39	0.415977
0.182	-2.52	0.435234
0.183	-2.42	0.393153
0.184	-2.29	0.414159
0.185	-2.21	0.419648
0.186	-2.19	0.411158
0.187	-2.12	0.369137
0.188	-1.99	0.356398
0.189	-1.94	0.310848
0.19	-1.92	0.342843
0.191	-1.76	0.333862
0.192	-1.52	0.390448
0.193	-1.65	0.429494
0.194	-1.63	0.424314
0.195	-1.6	0.410791
0.196	-1.52	0.400736
0.197	-1.4	0.384737
0.198	-1.19	0.376068
0.199	-1.11	0.37075
0.2	-1.08	0.358191
0.201	-1.01	0.341292
0.202	-0.9	0.335054
0.203	-0.83	0.335227
0.204	-0.87	0.350213
0.205	-0.92	0.330115
0.206	-0.92	0.360162
0.207	-0.87	0.344923
0.208	-0.77	0.355016
0.209	-0.75	0.400295
0.21	-0.76	0.445854
0.211	-0.71	0.439654
0.212	-0.67	0.46123
0.213	-0.62	0.504983
0.214	-0.71	0.479788
0.215	-0.75	0.440402
0.216	-0.75	0.425862
0.217	-0.92	0.422502
0.218	-1.13	0.39659
0.219	-1.48	0.395881
0.22	-1.67	0.396396
0.221	-1.76	0.399067
0.222	-1.93	0.408721
0.223	-1.98	0.409604
0.224	-1.95	0.402466
0.225	-1.96	0.404668
0.226	-1.98	0.413618
0.227	-1.92	0.431775
0.228	-1.93	0.45263
0.229	-1.9	0.447629
0.23	-1.87	0.422755
0.231	-1.76	0.419535
0.232	-1.61	0.453683
0.233	-1.59	0.473944
0.234	-1.54	0.478372
0.235	-1.46	0.471019
0.236	-1.31	0.47257
0.237	-1.1	0.485077
0.238	-0.97	0.508154
0.239	-0.82	0.51801
0.24	-0.77	0.50568
0.241	-0.83	0.499195
0.242	-1.09	0.506856
0.243	-1.31	0.475863
0.244	-1.44	0.479394
0.245	-1.39	0.517924
0.246	-1.74	0.451624
0.247	-2.02	0.422957
0.248	-2.21	0.406791
0.249	-2.36	0.386988
0.25	-2.42	0.372155
0.251	-2.58	0.402017
0.252	-2.47	0.368673
0.253	-2.59	0.405322
0.254	-2.66	0.418147
0.255	-2.59	0.391586
0.256	-2.58	0.415409
0.257	-2.56	0.380683
0.258	-2.58	0.377225
0.259	-2.58	0.369203
0.26	-2.65	0.348724
0.261	-2.68	0.359267
0.262	-2.85	0.4209
0.263	-2.67	0.412417
0.264	-2.81	0.446315
0.265	-2.78	0.422326
0.266	-2.82	0.440858
0.267	-2.93	0.465619
0.268	-3.03	0.51124
0.269	-3.18	0.510907
0.27	-3.06	0.526379
0.271	-2.94	0.567309
0.272	-2.88	0.554425
0.273	-3.1	0.583864
0.274	-2.98	0.577146
0.275	-2.85	0.55413
0.276	-2.83	0.553317
0.277	-2.67	0.547014
0.278	-2.58	0.525579
0.279	-2.52	0.529682
0.28	-2.41	0.535439
0.281	-2.39	0.507417
0.282	-2.2	0.476583
0.283	-1.98	0.466048
0.284	-1.79	0.480559
0.285	-1.69	0.463586
0.286	-1.65	0.458255
0.287	-1.68	0.430583
0.288	-1.83	0.383664
0.289	-1.8	0.402678
0.29	-1.89	0.394852
0.291	-1.96	0.373943
0.292	-2.1	0.384095
0.293	-2.36	0.388533
0.294	-2.36	0.372415
0.295	-2.31	0.414488
0.296	-2.15	0.423284
0.297	-2.19	0.376397
0.298	-2.1	0.383242
0.299	-2.1	0.425657
0.3	-2.14	0.422984
0.301	-2.05	0.411084
0.302	-1.97	0.403781
0.303	-1.87	0.396436
0.304	-1.78	0.38958
0.305	-1.77	0.384897
0.306	-1.71	0.396354
0.307	-1.71	0.383331
0.308	-1.53	0.37673
0.309	-1.4	0.38777
0.31	-1.34	0.386949
0.311	-1.26	0.373528
0.312	-1.2	0.353448
0.313	-1.05	0.39568
0.314	-1.1	0.341807
0.315	-1.23	0.341369
0.316	-1.23	0.347235
0.317	-1.25	0.348375
0.318	-1.3	0.362833
0.319	-1.12	0.362939
0.32	-0.94	0.403906
0.321	-0.8	0.394666
0.322	-0.69	0.392717
0.323	-0.65	0.376556
0.324	-0.54	0.394053
0.325	-0.45	0.414242
0.326	-0.32	0.4445
0.327	-0.33	0.451079
0.328	-0.21	0.459036
0.329	-0.1	0.446731
0.33	-0.11	0.428492
0.331	-0.07	0.450452
0.332	-0.16	0.470916
0.333	-0.46	0.453086
0.334	-0.64	0.485805
0.335	-1.01	0.47376
0.336	-1.24	0.460733
0.337	-1.68	0.502454
0.338	-1.77	0.548569
0.339	-2.07	0.558677
0.34	-2.25	0.649084
0.341	-2.62	0.611072
0.342	-2.75	0.628869
0.343	-2.67	0.618038
0.344	-2.75	0.585862
0.345	-2.91	0.579338
0.346	-2.98	0.566011
0.347	-2.99	0.508257
0.348	-2.96	0.450824
0.349	-2.86	0.413365
0.35	-2.94	0.377606
0.351	-3.04	0.441116
0.352	-2.95	0.456013
0.353	-2.9	0.496526
0.354	-3.01	0.525676
0.355	-3.16	0.521537
0.356	-3.04	0.558898
0.357	-3.07	0.517566
0.358	-2.91	0.499989
0.359	-2.92	0.474928
0.36	-2.78	0.472498
0.361	-3.01	0.452325
0.362	-3.26	0.532919
0.363	-3.25	0.510983
0.364	-3.13	0.516023
0.365	-3.19	0.493381
0.366	-3.13	0.484574
0.367	-3.12	0.482159
0.368	-3.13	0.509792
0.369	-2.97	0.495189
0.37	-2.93	0.470837
0.371	-2.86	0.451018
0.372	-2.88	0.418812
0.373	-3.06	0.487726
0.374	-2.96	0.486466
0.375	-2.87	0.484096
0.376	-2.78	0.468967
0.377	-2.59	0.474641
0.378	-2.48	0.455237
0.379	-2.3	0.443811
0.38	-2.2	0.426613
0.381	-2.12	0.410814
0.382	-2.12	0.394181
0.383	-2.01	0.389789
0.384	-1.98	0.435704
0.385	-2.09	0.520974
0.386	-2.17	0.586612
0.387	-1.62	0.380389
0.388	-1.76	0.425411
0.389	-1.71	0.417555
0.39	-1.61	0.43557
0.391	-1.45	0.486299
0.392	-1.21	0.526607
0.393	-1.26	0.504685
0.394	-1.29	0.487492
0.395	-1.22	0.459335
0.396	-1.32	0.461098
0.397	-0.93	0.509615
0.398	-1	0.529804
0.399	-0.82	0.529895
0.4	-0.55	0.551692
0.401	-0.34	0.565575
0.402	-0.09	0.590616
0.403	0.27	0.680451
0.404	0.5	0.76727
0.405	0.25	0.58633
0.406	0.16	0.505752
0.407	0.2	0.466677
0.408	0.17	0.442192
0.409	0.29	0.482676
0.41	0.12	0.41359
0.411	-0.11	0.379886
0.412	-0.12	0.403277
0.413	0.03	0.493292
0.414	-0.2	0.419497
0.415	-0.09	0.511436
0.416	-0.18	0.515174
0.417	-0.82	0.460901
0.418	-0.96	0.506197
0.419	-1.16	0.544333
0.42	-1.57	0.599451
0.421	-1.88	0.655198
0.422	-2.11	0.634238
0.423	-2.3	0.632167
0.424	-2.52	0.667552
0.425	-2.63	0.686848
0.426	-2.76	0.691545
0.427	-2.86	0.681568
0.428	-3.01	0.679814
0.429	-2.9	0.644184
0.43	-2.88	0.598219
0.431	-3.12	0.617411
0.432	-3.2	0.646373
0.433	-3.28	0.622915
0.434	-3.33	0.61149
0.435	-3.38	0.601576
0.436	-3.24	0.612802
0.437	-3.43	0.547952
0.438	-3.52	0.562145
0.439	-3.53	0.569925
0.44	-3.43	0.554267
0.441	-3.43	0.549092
0.442	-3.39	0.563535
0.443	-3.47	0.554847
0.444	-3.52	0.553438
0.445	-3.5	0.554601
0.446	-3.56	0.546682
0.447	-3.58	0.54353
0.448	-3.56	0.548096
0.449	-3.48	0.544353
0.45	-3.43	0.555699
0.451	-3.36	0.539731
0.452	-3.43	0.533181
0.453	-3.59	0.530067
0.454	-3.62	0.533072
0.455	-3.65	0.473526
0.456	-3.71	0.49803
0.457	-3.74	0.507257
0.458	-3.66	0.444776
0.459	-3.69	0.464597
0.46	-3.84	0.481095
0.461	-3.96	0.509417
0.462	-3.97	0.478621
0.463	-3.91	0.499074
0.464	-3.79	0.499587
0.465	-3.76	0.504654
0.466	-3.8	0.506049
0.467	-3.74	0.508602
0.468	-3.67	0.524783
0.469	-3.61	0.526644
0.47	-3.48	0.525773
0.471	-3.61	0.571734
0.472	-3.32	0.529002
0.473	-3.2	0.506745
0.474	-3.05	0.500313
0.475	-2.91	0.515307
0.476	-2.87	0.522091
0.477	-2.81	0.541503
0.478	-2.72	0.553543
0.479	-2.54	0.586028
0.48	-2.49	0.540634
0.481	-2.53	0.537482
0.482	-2.36	0.531282
0.483	-2.08	0.548308
0.484	-2.13	0.518968
0.485	-2.17	0.50738
0.486	-2.19	0.517527
0.487	-2.17	0.527658
0.488	-2.09	0.529928
0.489	-1.89	0.524452
0.49	-1.64	0.521334
0.491	-1.57	0.526847
0.492	-1.57	0.512654
0.493	-1.54	0.513198
0.494	-1.48	0.536596
0.495	-1.53	0.539069
0.496	-1.46	0.562093
0.497	-1.37	0.502407
0.498	-1.35	0.441456
0.499	-1.3	0.438911
0.5	-1.36	0.432761
0.501	-1.44	0.429522
0.502	-1.49	0.432139
0.503	-1.52	0.422217
0.504	-1.58	0.419941
0.505	-1.65	0.427492
0.506	-1.72	0.445976
0.507	-1.81	0.467856
0.508	-1.91	0.496791
0.509	-2.1	0.530659
0.51	-2	0.582779
0.511	-1.99	0.594323
0.512	-2.01	0.612198
0.513	-2.06	0.611538
0.514	-2.1	0.620944
0.515	-2.14	0.632489
0.516	-2.18	0.614603
0.517	-2.09	0.626093
0.518	-2.14	0.624995
0.519	-2.1	0.646015
0.52	-2.13	0.647957
0.521	-2.15	0.651628
0.522	-2.11	0.625886
0.523	-2.07	0.617549
0.524	-2.09	0.627423
0.525	-2.15	0.650293
0.526	-2.14	0.680771
0.527	-2.2	0.655067
0.528	-2.3	0.648066
0.529	-2.22	0.620613
0.53	-2.38	0.607371
0.531	-2.45	0.553119
0.532	-2.44	0.517881
0.533	-2.62	0.512456
0.534	-2.72	0.503192
0.535	-2.82	0.490945
0.536	-2.88	0.488781
0.537	-2.91	0.500694
0.538	-2.95	0.522081
0.539	-3.04	0.547773
0.54	-3.02	0.580468
0.541	-3.13	0.571876
0.542	-3.15	0.578609
0.543	-2.92	0.566552
0.544	-3	0.550274
0.545	-2.86	0.52845
0.546	-2.73	0.514433
0.547	-2.7	0.503542
0.548	-2.65	0.495634
0.549	-2.66	0.492213
0.55	-2.62	0.481118
0.551	-2.62	0.481796
0.552	-2.57	0.460902
0.553	-2.47	0.453553
0.554	-2.3	0.459348
0.555	-2.37	0.447971
0.556	-2.36	0.450514
0.557	-2.4	0.44459
0.558	-2.23	0.447152
0.559	-2.23	0.447751
0.56	-2.07	0.456085
0.561	-2.09	0.454402
0.562	-2.01	0.454699
0.563	-1.94	0.449063
0.564	-1.81	0.449981
0.565	-1.64	0.448772
0.566	-1.54	0.451353
0.567	-1.41	0.456973
0.568	-1.38	0.431976
0.569	-1.48	0.391791
0.57	-1.48	0.382247
0.571	-1.5	0.392794
0.572	-1.47	0.413514
0.573	-1.27	0.411583
0.574	-1.17	0.407308
0.575	-1.07	0.401921
0.576	-1.06	0.402289
0.577	-1.07	0.397733
0.578	-1.16	0.402218
0.579	-1.21	0.408894
0.58	-1.36	0.428754
0.581	-1.53	0.469676
0.582	-1.54	0.472248
0.583	-1.51	0.486078
0.584	-1.35	0.453547
0.585	-1.36	0.468336
0.586	-1.36	0.482366
0.587	-1.42	0.497656
0.588	-1.47	0.510076
0.589	-1.41	0.520081
0.59	-1.28	0.537094
0.591	-1.33	0.536324
0.592	-1.52	0.604101
0.593	-1.45	0.535338
0.594	-1.31	0.487449
0.595	-1.15	0.450181
0.596	-1	0.43405
0.597	-1.01	0.412331
0.598	-1.08	0.422601
0.599	-1.05	0.423623
0.6	-1.05	0.444363
0.601	-0.86	0.426254
0.602	-0.85	0.420188
0.603	-0.76	0.422611
0.604	-0.74	0.432484
0.605	-0.68	0.439875
0.606	-0.64	0.440448
0.607	-0.64	0.440259
0.608	-0.75	0.423312
0.609	-0.85	0.421338
0.61	-0.86	0.433033
0.611	-0.93	0.440428
0.612	-0.99	0.441699
0.613	-1.01	0.442431
0.614	-1.09	0.464331
0.615	-1.2	0.480325
0.616	-1.38	0.556912
0.617	-1.49	0.512769
0.618	-1.45	0.495886
0.619	-1.55	0.495299
0.62	-1.62	0.508031
0.621	-1.72	0.514782
0.622	-1.89	0.517862
0.623	-2.05	0.528969
0.624	-2.27	0.539028
0.625	-2.47	0.56766
0.626	-2.58	0.594912
0.627	-2.65	0.589144
0.628	-2.74	0.619377
0.629	-2.84	0.586745
0.63	-2.89	0.553815
0.631	-2.92	0.525933
0.632	-2.89	0.515353
0.633	-2.86	0.508569
0.634	-2.88	0.513591
0.635	-2.86	0.526051
0.636	-2.84	0.534859
0.637	-2.9	0.533662
0.638	-2.75	0.53834
0.639	-2.74	0.539224
0.64	-2.68	0.547491
0.641	-2.65	0.563347
0.642	-2.65	0.586781
0.643	-2.53	0.613191
0.644	-2.51	0.643023
0.645	-2.26	0.596438
0.646	-2.43	0.543707
0.647	-2.45	0.534228
0.648	-2.43	0.519375
0.649	-2.47	0.510885
0.65	-2.56	0.503738
0.651	-2.52	0.465572
0.652	-2.76	0.492373
0.653	-2.63	0.483355
0.654	-2.57	0.479522
0.655	-2.53	0.484132
0.656	-2.41	0.493031
0.657	-2.42	0.480308
0.658	-2.52	0.470871
0.659	-2.56	0.464676
0.66	-2.57	0.467037
0.661	-2.6	0.475761
0.662	-2.63	0.480032
0.663	-2.67	0.477013
0.664	-2.64	0.461515
0.665	-2.61	0.454042
0.666	-2.56	0.475495
0.667	-2.63	0.489412
0.668	-2.63	0.526994
0.669	-2.73	0.527718
0.67	-2.73	0.541687
0.671	-2.75	0.544776
0.672	-2.76	0.544984
0.673	-2.87	0.544962
0.674	-2.77	0.523952
0.675	-2.64	0.506339
0.676	-2.67	0.483524
0.677	-2.52	0.473249
0.678	-2.44	0.466262
0.679	-2.38	0.476902
0.68	-2.37	0.485292
0.681	-2.32	0.496913
0.682	-2.22	0.484345
0.683	-2	0.477035
0.684	-2	0.484415
0.685	-2.12	0.499225
0.686	-2.14	0.529624
0.687	-1.84	0.475541
0.688	-1.54	0.463852
0.689	-1.04	0.490337
0.69	-1.02	0.48366
0.691	-1.15	0.489826
0.692	-1.15	0.494569
0.693	-0.92	0.470506
0.694	-1.45	0.610739
0.695	-1.42	0.620638
0.696	-1.43	0.606258
0.697	-1.39	0.569016
0.698	-1.22	0.547479
0.699	-1.12	0.528371
0.7	-1.02	0.521098
0.701	-1.04	0.524116
0.702	-1.02	0.517951
0.703	-1.18	0.578204
0.704	-1.07	0.509548
0.705	-0.94	0.476685
0.706	-0.92	0.427053
0.707	-1.01	0.417239
0.708	-1.24	0.431658
0.709	-1.38	0.464801
0.71	-1.56	0.486526
0.711	-1.74	0.518946
0.712	-2.08	0.564625
0.713	-2.19	0.521238
0.714	-2.31	0.475125
0.715	-2.8	0.497312
0.716	-2.76	0.48181
0.717	-2.81	0.484352
0.718	-2.83	0.478923
0.719	-2.85	0.474349
0.72	-2.82	0.459988
0.721	-2.77	0.452041
0.722	-2.74	0.452573
0.723	-2.63	0.44266
0.724	-2.59	0.45496
0.725	-2.54	0.471039
0.726	-2.6	0.485523
0.727	-2.63	0.491208
0.728	-2.61	0.500989
0.729	-2.53	0.513965
0.73	-2.44	0.523552
0.731	-2.31	0.53366
0.732	-2.26	0.519481
0.733	-2.3	0.498022
0.734	-2.22	0.501285
0.735	-2.18	0.509211
0.736	-2.05	0.507311
0.737	-1.97	0.505983
0.738	-1.94	0.487491
0.739	-1.95	0.475372
0.74	-2.01	0.460402
0.741	-2.11	0.452384
0.742	-2.2	0.446784
0.743	-2.25	0.449569
0.744	-2.35	0.45859
0.745	-2.42	0.470118
0.746	-2.58	0.433148
0.747	-2.66	0.403064
0.748	-2.6	0.373256
0.749	-2.46	0.348676
0.75	-2.36	0.326751
0.751	-2.32	0.307637
0.752	-2.33	0.294779
0.753	-2.38	0.313232
0.754	-2.34	0.310746
0.755	-2.4	0.352936
0.756	-2.25	0.329716
0.757	-2.43	0.352965
0.758	-2.39	0.400508
0.759	-2.54	0.44555
0.76	-2.33	0.398645
0.761	-2.14	0.364875
0.762	-1.96	0.376388
0.763	-2	0.380268
0.764	-1.88	0.351999
0.765	-2.01	0.376635
0.766	-1.98	0.366711
0.767	-1.99	0.383613
0.768	-1.98	0.393929
0.769	-2.04	0.399393
0.77	-2.09	0.4015
0.771	-2.06	0.422765
0.772	-1.98	0.458027
0.773	-1.91	0.469792
0.774	-1.8	0.473533
0.775	-1.68	0.449591
0.776	-1.49	0.433937
0.777	-1.38	0.401323
0.778	-1.14	0.400937
0.779	-1.34	0.408022
0.78	-1.17	0.383855
0.781	-1	0.366155
0.782	-0.89	0.330069
0.783	-0.84	0.325773
0.784	-0.92	0.302405
0.785	-1.13	0.322338
0.786	-1.35	0.367699
0.787	-1.52	0.359081
0.788	-1.7	0.355483
0.789	-2.03	0.379208
0.79	-2.34	0.407501
0.791	-2.61	0.442937
0.792	-2.69	0.397359
0.793	-3.12	0.422028
0.794	-3.67	0.476551
0.795	-3.83	0.454907
0.796	-3.95	0.476835
0.797	-3.9	0.471226
0.798	-3.62	0.431389
0.799	-3.81	0.448276
0.8	-3.73	0.426437
0.801	-4.01	0.483261
0.802	-3.85	0.438044
0.803	-3.85	0.447388
0.804	-3.8	0.438825
0.805	-3.9	0.411956
0.806	-3.84	0.399882
0.807	-3.73	0.409514
0.808	-3.6	0.409948
0.809	-3.52	0.41364
0.81	-3.13	0.364345
0.811	-2.79	0.373566
0.812	-2.67	0.379011
0.813	-2.67	0.389503
0.814	-2.58	0.406261
0.815	-2.55	0.385037
0.816	-2.52	0.373502
0.817	-2.51	0.397244
0.818	-2.47	0.439298
0.819	-2.31	0.437576
0.82	-2.13	0.429853
0.821	-2.07	0.414026
0.822	-1.97	0.399131
0.823	-1.92	0.383806
0.824	-1.94	0.402393
0.825	-1.99	0.420229
0.826	-2.03	0.437066
0.827	-2.02	0.453223
0.828	-2.1	0.467248
0.829	-2.11	0.469804
0.83	-2.14	0.466008
0.831	-1.98	0.472208
0.832	-1.96	0.462419
0.833	-1.79	0.457934
0.834	-1.7	0.434691
0.835	-1.73	0.416518
0.836	-1.66	0.410745
0.837	-1.68	0.40677
0.838	-1.62	0.412457
0.839	-1.6	0.385692
0.84	-1.53	0.36658
0.841	-1.41	0.345399
0.842	-1.23	0.330577
0.843	-1.2	0.319883
0.844	-1.04	0.321528
0.845	-1.03	0.315764
0.846	-1.03	0.312111
0.847	-1.07	0.311276
0.848	-1.1	0.310979
0.849	-1.19	0.33594
0.85	-1.24	0.36228
0.851	-1.51	0.393529
0.852	-1.42	0.370719
0.853	-1.23	0.356566
0.854	-1.07	0.350322
0.855	-0.93	0.358361
0.856	-0.9	0.374155
0.857	-0.78	0.388442
0.858	-0.76	0.395797
0.859	-0.83	0.377304
0.86	-0.86	0.370095
0.861	-1.1	0.381561
0.862	-1.42	0.380749
0.863	-1.69	0.389967
0.864	-1.97	0.404199
0.865	-2.34	0.422573
0.866	-2.53	0.407787
0.867	-2.79	0.403903
0.868	-2.79	0.397938
0.869	-2.98	0.373185
0.87	-3.03	0.37756
0.871	-3.17	0.364594
0.872	-3.29	0.362369
0.873	-3.3	0.367604
0.874	-3.35	0.384244
0.875	-3.24	0.358772
0.876	-3.22	0.310267
0.877	-3.19	0.295758
0.878	-3.1	0.317934
0.879	-3.32	0.376872
0.88	-3.38	0.398784
0.881	-3.66	0.412958
0.882	-3.56	0.406788
0.883	-3.6	0.392514
0.884	-3.64	0.383879
0.885	-3.72	0.375904
0.886	-3.7	0.377494
0.887	-3.52	0.387596
0.888	-3.61	0.379477
0.889	-3.38	0.350354
0.89	-3.28	0.333031
0.891	-3.05	0.329707
0.892	-3.01	0.325993
0.893	-2.97	0.323576
0.894	-2.91	0.319227
0.895	-2.88	0.316235
0.896	-2.89	0.316871
0.897	-2.87	0.310473
0.898	-2.83	0.306725
0.899	-2.7	0.303503
0.9	-2.67777	0.299513
0.901	-2.54575	0.298655
0.902	-2.49375	0.30017
0.903	-2.3322	0.306352
0.904	-2.25058	0.311458
0.905	-2.25865	0.302292
0.906	-2.23688	0.300358
0.907	-2.25487	0.299699
0.908	-2.20335	0.291625
0.909	-2.17175	0.286616
0.91	-2.13029	0.295135
0.911	-2.0493	0.269759
0.912	-2.16628	0.264348
0.913	-2.32258	0.28002
0.914	-2.32063	0.291664
0.915	-2.4568	0.292426
0.916	-2.66175	0.304695
0.917	-2.92545	0.320382
0.918	-3.00171	0.345599
0.919	-3.14667	0.341348
0.92	-3.21278	0.324292
0.921	-3.34748	0.308929
0.922	-3.42311	0.30495
0.923	-3.3908	0.299192
0.924	-3.33896	0.29811
0.925	-3.21872	0.304329
0.926	-3.14755	0.312416
0.927	-3.20347	0.30918
0.928	-3.15194	0.318062
0.929	-3.05175	0.323371
0.93	-2.89328	0.30783
0.931	-2.8324	0.295626
0.932	-2.69383	0.279967
0.933	-2.41945	0.275272
0.934	-2.2135	0.255751
0.935	-2.1631	0.243478
0.936	-2.10309	0.239467
0.937	-2.0335	0.24549
0.938	-1.90598	0.259523
0.939	-1.77867	0.279486
0.94	-1.8544	0.282423
0.941	-1.78525	0.271805
0.942	-1.62944	0.277375
0.943	-1.46427	0.282622
0.944	-1.39563	0.298035
0.945	-1.25978	0.321132
0.946	-1.18183	0.350529
0.947	-1.0368	0.361673
0.948	-0.987942	0.360565
0.949	-0.881667	0.365165
0.95	-0.718125	0.375732
0.951	-0.6888	0.381851
0.952	-0.697758	0.388103
0.953	-0.67805	0.392638
0.954	-0.715625	0.399245
0.955	-0.734067	0.396875
0.956	-0.762	0.395874
0.957	-0.9136	0.376315
0.958	-1.03641	0.359574
0.959	-0.988	0.360809
0.96	-1.01561	0.362084
0.961	-1.16645	0.339494
0.962	-1.24123	0.335122
0.963	-1.38213	0.333321
0.964	-1.55117	0.339427
0.965	-1.59705	0.347563
0.966	-1.59564	0.342084
0.967	-1.5848	0.328605
0.968	-1.71535	0.297819
0.969	-1.76092	0.292807
0.97	-1.64646	0.290971
0.971	-1.5792	0.304347
0.972	-1.44632	0.321572
0.973	-1.52948	0.320894
0.974	-1.5375	0.329672
0.975	-1.49867	0.326381
0.976	-1.50669	0.329972
0.977	-1.43055	0.334179
0.978	-1.41059	0.343286
0.979	-1.40933	0.343227
0.98	-1.50133	0.344869
0.981	-1.55588	0.366934
0.982	-1.65688	0.367592
0.983	-1.86	0.411025
0.984	-1.84904	0.429377
0.985	-1.8381	0.438794
0.986	-1.84573	0.405339
0.987	-1.81627	0.377809
0.988	-1.69428	0.36069
0.989	-1.628	0.352822
0.99	-1.67274	0.353328
0.991	-1.70817	0.365479
0.992	-1.59593	0.342495
0.993	-1.52997	0.338834
0.994	-1.34442	0.346935
0.995	-1.2696	0.352762
0.996	-1.14896	0.347992
0.997	-1.12037	0.344083
0.998	-1.0643	0.326528
0.999	-1.02667	0.307817
1	-1.04405	0.304267
1.001	-1.01565	0.296601
1.002	-0.996442	0.282834
1.003	-1.18733	0.3265
1.004	-1.2775	0.308492
1.005	-1.27633	0.30455
1.006	-1.24784	0.30508
1.007	-1.2558	0.306343
1.008	-1.32738	0.304522
1.009	-1.3625	0.311165
1.01	-1.4157	0.319968
1.011	-1.3872	0.320378
1.012	-1.4131	0.317639
1.013	-1.33035	0.326547
1.014	-1.32913	0.323565
1.015	-1.2195	0.32234
1.016	-1.17325	0.320679
1.017	-1.06397	0.326473
1.018	-1.01794	0.318485
1.019	-0.9	0.322553
1.02	-0.881184	0.330164
1.021	-0.772567	0.325023
1.022	-0.655175	0.324699
1.023	-0.690434	0.346133
1.024	-0.671875	0.354453
1.025	-0.59965	0.346765
1.026	-0.5365	0.335263
1.027	-0.464534	0.321965
1.028	-0.4641	0.312929
1.029	-0.463667	0.308347
1.03	-0.5345	0.303284
1.031	-0.623	0.300652
1.032	-0.720225	0.299153
1.033	-0.82615	0.295211
1.034	-0.914125	0.294521
1.035	-1.0108	0.294368
1.036	-1.16044	0.293636
1.037	-1.2213	0.295749
1.038	-1.36162	0.299539
1.039	-1.42217	0.300759
1.04	-1.35023	0.30768
1.041	-1.44593	0.308201
1.042	-1.36529	0.301781
1.043	-1.3024	0.307189
1.044	-1.23963	0.315929
1.045	-1.22088	0.32832
1.046	-1.28993	0.335018
1.047	-1.35007	0.333592
1.048	-1.43637	0.324205
1.049	-1.47	0.310189
1.05	-1.45986	0.303968
1.051	-1.4672	0.30631
1.052	-1.52688	0.324585
1.053	-1.45568	0.331131
1.054	-1.43688	0.341592
1.055	-1.2876	0.309725
1.056	-1.36459	0.280589
1.057	-1.23303	0.277476
1.058	-1.17113	0.29306
1.059	-1.17	0.282728
1.06	-1.12558	0.290612
1.061	-0.994751	0.303535
1.062	-0.812317	0.297393
1.063	-0.6734	0.288222
1.064	-0.508875	0.30037
1.065	-0.327434	0.303207
1.066	-0.137733	0.294249
1.067	-0.0172	0.282671
1.068	0.0859167	0.273256
1.069	0.163083	0.267715
1.07	0.197225	0.276086
1.071	0.171333	0.28284
1.072	0.171167	0.290758
1.073	0.19665	0.294721
1.074	0.170833	0.301656
1.075	0.2048	0.286892
1.076	0.213125	0.268991
1.077	0.1533	0.255269
1.078	0.187183	0.24593
1.079	0.238	0.232383
1.08	0.297209	0.22503
1.081	0.33085	0.223127
1.082	0.313575	0.228175
1.083	0.237067	0.239237
1.084	0.160708	0.258662
1.085	0.12675	0.249172
1.086	-0.1013	0.235094
1.087	-0.2024	0.228875
1.088	-0.4044	0.208765
1.089	-0.446084	0.215014
1.09	-0.55495	0.219957
1.091	-0.5628	0.224217
1.092	-0.6042	0.230549
1.093	-0.796417	0.226785
1.094	-0.938001	0.235899
1.095	-1.07093	0.243608
1.096	-1.16181	0.247965
1.097	-1.17735	0.260499
1.098	-1.08442	0.284909
1.099	-1.20833	0.325841
1.1	-1.09058	0.308527
1.101	-1.08948	0.308444
1.102	-1.16317	0.31746
1.103	-1.2284	0.339424
1.104	-1.16913	0.361874
1.105	-1.05198	0.343146
1.106	-0.868876	0.330499
1.107	-0.801867	0.334732
1.108	-0.635892	0.325965
1.109	-0.610501	0.313699
1.11	-0.329667	0.276488
1.111	-0.5187	0.270991
1.112	-0.616876	0.26174
1.113	-0.723067	0.25765
1.114	-0.796209	0.256227
1.115	-0.844601	0.256491
1.116	-0.950234	0.259907
1.117	-1.01473	0.246321
1.118	-1.03005	0.237334
1.119	-1.14333	0.234706
1.12	-1.19928	0.238944
1.121	-1.3366	0.247909
1.122	-1.48178	0.257207
1.123	-1.5372	0.264538
1.124	-1.51938	0.250866
1.125	-1.47723	0.244129
1.126	-1.38653	0.246989
1.127	-1.3284	0.244462
1.128	-1.31085	0.240297
1.129	-1.34992	0.249719
1.13	-1.39698	0.260416
1.131	-1.39553	0.27861
1.132	-1.49079	0.296388
1.133	-1.58585	0.322527
1.134	-1.47967	0.320683
1.135	-1.205	0.320214
1.136	-1.3482	0.294685
1.137	-1.35482	0.294149
1.138	-1.44951	0.290785
1.139	-1.36	0.289278
1.14	-1.23871	0.296122
1.141	-1.0538	0.307802
1.142	-1.06068	0.293081
1.143	-0.979901	0.284046
1.144	-0.947043	0.27589
1.145	-0.914251	0.271316
1.146	-0.825934	0.254457
1.147	-0.690201	0.23971
1.148	-0.586451	0.235483
1.149	-0.467084	0.236507
1.15	-0.403325	0.228394
1.151	-0.3634	0.217753
1.152	-0.457717	0.259847
1.153	-0.457234	0.295266
1.154	-0.378	0.283799
1.155	-0.322534	0.275195
1.156	-0.220034	0.268222
1.157	-0.14915	0.266922
1.158	-0.0941001	0.252354
1.159	-0.0470001	0.25916
1.16	-0.039125	0.266338
1.161	-0.02345	0.273707
1.162	0.0390417	0.266731
1.163	0.1248	0.266828
1.164	0.109083	0.268082
1.165	0.124533	0.272007
1.166	0.163275	0.274171
1.167	0.178634	0.28451
1.168	0.170684	0.289809
1.169	0.24025	0.296878
1.17	0.239992	0.297963
1.171	0.2088	0.298176
1.172	0.2163	0.296162
1.173	0.223784	0.294918
1.174	0.246667	0.294231
1.175	0.2079	0.298149
1.176	0.215367	0.302386
1.177	0.215134	0.304117
1.178	0.1842	0.299613
1.179	0.207	0.299447
1.18	0.222092	0.299802
1.181	0.3213	0.280637
1.182	0.359159	0.257166
1.183	0.3893	0.237031
1.184	0.35075	0.223079
1.185	0.373217	0.219242
1.186	0.349984	0.216156
1.187	0.3496	0.231596
1.188	0.341625	0.23434
1.189	0.288167	0.232138
1.19	0.2727	0.2498
1.191	0.0605334	0.239525
1.192	-0.022675	0.24685
1.193	-0.1963	0.277203
1.194	-0.256417	0.273756
1.195	-0.421867	0.275114
1.196	-0.489126	0.27857
1.197	-0.533684	0.280667
1.198	-0.713293	0.272479
1.199	-0.817501	0.289628
1.2	-0.913985	0.300555
1.201	-0.890518	0.305495
1.202	-0.882051	0.322386
1.203	-0.910935	0.329874
1.204	-0.895001	0.33852
1.205	-0.871651	0.346852
1.206	-0.855793	0.348778
1.207	-0.773068	0.339038
1.208	-0.705376	0.266688
1.209	-0.615584	0.242821
1.21	-0.644526	0.219474
1.211	-0.584601	0.202686
1.212	-0.554376	0.203315
1.213	-0.642351	0.208817
1.214	-0.641626	0.212789
1.215	-0.773501	0.246064
1.216	-0.853568	0.255961
1.217	-0.911401	0.271165
1.218	-0.844293	0.296641
1.219	-0.858001	0.296925
1.22	-0.900976	0.291223
1.221	-0.863368	0.267843
1.222	-0.767376	0.255743
1.223	-0.678901	0.246063
1.224	-0.612501	0.240835
1.225	-0.517117	0.239246
1.226	-0.400126	0.244921
1.227	-0.290667	0.245646
1.228	-0.275817	0.246627
1.229	-0.16675	0.249533
1.23	-0.0941418	0.257259
1.231	0.137434	0.26197
1.232	0.21675	0.258141
1.233	0.202067	0.261378
1.234	0.194625	0.266633
1.235	0.1944	0.274436
1.236	0.1726	0.283926
1.237	0.165217	0.291823
1.238	0.0789251	0.304305
1.239	0.00716668	0.321773
1.24	-0.0143167	0.325081
1.241	-0.0858001	0.312929
1.242	-0.249959	0.322022
1.243	-0.428001	0.329942
1.244	-0.577126	0.319035
1.245	-0.782835	0.311577
1.246	-1.00938	0.323784
1.247	-1.1005	0.323463
1.248	-1.20559	0.304627
1.249	-1.24667	0.29142
1.25	-1.2735	0.285788
1.251	-1.17307	0.288782
1.252	-1.12934	0.288576
1.253	-1.269	0.288128
1.254	-1.30975	0.286736
1.255	-1.37854	0.286406
1.256	-1.39798	0.337934
1.257	-1.40334	0.361795
1.258	-1.3456	0.319039
1.259	-1.344	0.331624
1.26	-1.2585	0.324945
1.261	-1.34779	0.368101
1.262	-1.31828	0.379184
1.263	-1.3167	0.38267
1.264	-1.22467	0.36014
1.265	-1.0703	0.365532
1.266	-0.971835	0.35356
1.267	-0.929068	0.337763
1.268	-0.893327	0.323194
1.269	-0.892252	0.324003
1.27	-0.79446	0.331815
1.271	-0.738301	0.331446
1.272	-0.634034	0.340688
1.273	-0.591968	0.340704
1.274	-0.522501	0.351086
1.275	-0.508134	0.337258
1.276	-0.445792	0.315678
1.277	-0.445251	0.303639
1.278	-0.362609	0.283485
1.279	-0.403167	0.27593
1.28	-0.293476	0.253904
1.281	-0.361284	0.262422
1.282	-0.483393	0.294125
1.283	-0.503201	0.308955
1.284	-0.570501	0.349392
1.285	-0.583368	0.358067
1.286	-0.596201	0.351768
1.287	-0.507501	0.33703
1.288	-0.527151	0.338476
1.289	-0.587251	0.343003
1.29	-0.647201	0.349509
1.291	-0.538668	0.342971
1.292	-0.531276	0.351307
1.293	-0.611218	0.36738
1.294	-0.69096	0.381133
1.295	-0.716901	0.379198
1.296	-0.695935	0.382919
1.297	-0.681701	0.361872
1.298	-0.747601	0.365708
1.299	-0.706668	0.313797
1.3	-0.665835	0.280099
1.301	-0.638401	0.263602
1.302	-0.59111	0.260867
1.303	-0.550568	0.267759
1.304	-0.503501	0.270173
1.305	-0.456551	0.272692
1.306	-0.370067	0.270649
1.307	-0.323401	0.270221
1.308	-0.270259	0.27131
1.309	-0.190917	0.272122
1.31	-0.124925	0.278056
1.311	-0.1182	0.279968
1.312	-0.0459084	0.286683
1.313	-0.0131	0.284121
1.314	0.0785002	0.309132
1.315	0.163334	0.304191
1.316	0.228375	0.296392
1.317	0.241117	0.276233
1.318	0.253826	0.257463
1.319	0.240501	0.237827
1.32	0.1558	0.227031
1.321	0.0842835	0.234387
1.322	0.019425	0.250586
1.323	-0.0452668	0.27553
1.324	-0.0968752	0.290306
1.325	-0.1161	0.315499
1.326	-0.1546	0.332835
1.327	-0.109367	0.309117
1.328	-0.1285	0.286556
1.329	-0.179667	0.279403
1.33	-0.211475	0.259268
1.331	-0.224001	0.248008
1.332	-0.249276	0.236447
1.333	-0.344701	0.248609
1.334	-0.459001	0.265
1.335	-0.413834	0.277369
1.336	-0.324276	0.310688
1.337	-0.438151	0.327506
1.338	-0.488309	0.330146
1.339	-0.500334	0.328399
1.34	-0.499676	0.324204
1.341	-0.467434	0.321615
1.342	-0.473126	0.324065
1.343	-0.428401	0.317314
1.344	-0.352334	0.28852
1.345	-0.163367	0.282668
1.346	-0.11295	0.264225
1.347	-0.0250667	0.267524
1.348	0.0500668	0.28468
1.349	0.13125	0.297095
1.35	0.18725	0.311534
1.351	0.162067	0.31828
1.352	0.273901	0.290733
1.353	0.373001	0.279275
1.354	0.484251	0.261309
1.355	0.589001	0.250908
1.356	0.569635	0.259594
1.357	0.556501	0.275315
1.358	0.605151	0.283473
1.359	0.616668	0.283064
1.36	0.59736	0.250136
1.361	0.602702	0.254407
1.362	0.589601	0.249946
1.363	0.545868	0.244464
1.364	0.447126	0.23443
1.365	0.336418	0.220677
1.366	0.244334	0.201621
1.367	0.0976002	0.211681
1.368	0.0243667	0.209774
1.369	-0.0486668	0.234516
1.37	-0.206551	0.238281
1.371	-0.321534	0.246755
1.372	-0.448318	0.226665
1.373	-0.520301	0.220997
1.374	-0.592085	0.208165
1.375	-0.573168	0.216215
1.376	-0.644677	0.207016
1.377	-0.655818	0.220709
1.378	-0.606843	0.238485
1.379	-0.636002	0.242193
1.38	-0.64111	0.247774
1.381	-0.646202	0.246614
1.382	-0.609452	0.255206
1.383	-0.513135	0.277042
1.384	-0.524335	0.288557
1.385	-0.446251	0.283411
1.386	-0.297084	0.32302
1.387	-0.255134	0.316989
1.388	-0.237001	0.307673
1.389	-0.230751	0.302074
1.39	-0.159525	0.293769
1.391	-0.0708002	0.298352
1.392	-0.0117834	0.29577
1.393	0.01765	0.299179
1.394	-0.01175	0.292883
1.395	-0.0704002	0.297617
1.396	-0.0234334	0.290554
1.397	0.0409501	0.315269
1.398	0.0934669	0.333526
1.399	0.0816669	0.327237
1.4	0.0466001	0.319341
1.401	0.0349001	0.310176
1.402	0.0290418	0.300739
1.403	0.0232001	0.298347
1.404	-0.0347501	0.296661
1.405	-0.1388	0.280349
1.406	-0.231001	0.284249
1.407	-0.294101	0.288806
1.408	-0.276401	0.274696
1.409	-0.16675	0.251803
1.41	-0.155025	0.25177
1.411	-0.177734	0.276087
1.412	-0.211826	0.276673
1.413	-0.205801	0.281755
1.414	-0.0856253	0.316742
1.415	-0.0855003	0.314595
1.416	-0.00569168	0.324449
1.417	0.0568335	0.338618
1.418	-0.01135	0.337809
1.419	-0.0283334	0.317302
1.42	-0.00565835	0.313688
1.421	0.0339001	0.326151
1.422	0.0507752	0.356599
1.423	0.0450668	0.327929
1.424	0.0618752	0.301224
1.425	0.106717	0.267284
1.426	0.112167	0.255544
1.427	0.1232	0.251175
1.428	0.156567	0.249471
1.429	0.15075	0.243581
1.43	0.12265	0.238934
1.431	0.205967	0.224069
1.432	0.255684	0.222221
1.433	0.288601	0.222789
1.434	0.387918	0.209603
1.435	0.403935	0.213552
1.436	0.375701	0.213747
1.437	0.408235	0.221773
1.438	0.40211	0.226839
1.439	0.407001	0.236837
1.44	0.411876	0.234296
1.441	0.460602	0.244883
1.442	0.454427	0.243836
1.443	0.464668	0.240655
1.444	0.469418	0.241029
1.445	0.501402	0.246578
1.446	0.489752	0.250889
1.447	0.478135	0.252816
1.448	0.444852	0.254062
1.449	0.390001	0.248923
1.45	0.281234	0.244396
1.451	0.172801	0.245284
1.452	0.0539169	0.245883
1.453	-0.156117	0.256622
1.454	-0.252626	0.248196
1.455	-0.375668	0.245651
1.456	-0.337576	0.239555
1.457	-0.315651	0.233022
1.458	-0.336526	0.232911
1.459	-0.384001	0.228892
1.46	-0.378076	0.237973
1.461	-0.425335	0.250505
1.462	-0.456518	0.26907
1.463	-0.418701	0.273561
1.464	-0.381001	0.281494
1.465	-0.322284	0.292865
1.466	-0.247926	0.302405
1.467	-0.215934	0.308867
1.468	-0.178784	0.317205
1.469	-0.1155	0.310962
1.47	-0.083867	0.287336
1.471	-0.0366335	0.268561
1.472	-0.00522502	0.251831
1.473	0.0260834	0.241407
1.474	0.0572919	0.236187
1.475	0.1144	0.239772
1.476	0.166134	0.225759
1.477	0.228068	0.225326
1.478	0.279451	0.227059
1.479	0.310001	0.232322
1.48	0.304343	0.238417
1.481	0.355351	0.248588
1.482	0.385626	0.257551
1.483	0.390135	0.258126
1.484	0.430502	0.258719
1.485	0.460502	0.260099
1.486	0.46486	0.25695
1.487	0.479402	0.250387
1.488	0.45316	0.240362
1.489	0.381251	0.23168
1.49	0.304501	0.229387
1.491	0.248268	0.241359
1.492	0.187159	0.250071
1.493	0.136351	0.251956
1.494	0.080667	0.255369
1.495	0.0352335	0.268402
1.496	-0.00502502	0.278682
1.497	-0.115384	0.291502
1.498	-0.150251	0.292522
1.499	-0.160001	0.295826
1.5	-0.13	0.292388
1.501	-0.125	0.300619
1.502	-0.13	0.300427
1.503	-0.16	0.300323
1.504	-0.17	0.28929
1.505	-0.18	0.280273
1.506	-0.165	0.268226
1.507	-0.135	0.273148
1.508	-0.125	0.277676
1.509	-0.1	0.286753
1.51	-0.07	0.270139
1.511	-0.05	0.257795
1.512	0.015	0.254554
1.513	0.055	0.253855
1.514	0.09	0.252151
1.515	0.1	0.251814
1.516	0.11	0.254707
1.517	0.1	0.257406
1.518	0.14	0.26125
1.519	0.15	0.275129
1.52	0.14	0.284729
1.521	0.155	0.291635
1.522	0.085	0.293765
1.523	0.095	0.286105
1.524	0.095	0.287046
1.525	0.05	0.300123
1.526	0.035	0.308268
1.527	0.01	0.299906
1.528	0.045	0.28944
1.529	-0.105	0.286011
1.53	-0.13	0.288032
1.531	-0.225	0.2867
1.532	-0.245	0.278088
1.533	-0.31	0.241851
1.534	-0.36	0.229267
1.535	-0.38	0.21984
1.536	-0.38	0.217148
1.537	-0.455	0.238478
1.538	-0.45	0.222981
1.539	-0.41	0.22178
1.54	-0.37	0.229233
1.541	-0.385	0.22586
1.542	-0.37	0.241135
1.543	-0.365	0.246614
1.544	-0.37	0.258591
1.545	-0.34	0.278232
1.546	-0.295	0.284187
1.547	-0.305	0.283578
1.548	-0.285	0.30168
1.549	-0.22	0.284193
1.55	-0.135	0.26756
1.551	0	0.260528
1.552	-0.03	0.260199
1.553	-0.075	0.271059
1.554	-0.09	0.251376
1.555	-0.09	0.247165
1.556	-0.095	0.236274
1.557	-0.05	0.239562
1.558	0.08	0.219167
1.559	0.16	0.209014
1.56	0.195	0.209149
1.561	0.21	0.213757
1.562	0.205	0.221705
1.563	0.215	0.217687
1.564	0.25	0.219155
1.565	0.22	0.227039
1.566	0.24	0.237596
1.567	0.205	0.23949
1.568	0.155	0.239689
1.569	0.14	0.234989
1.57	0.075	0.227084
1.571	0.055	0.233351
1.572	-0.015	0.225722
1.573	-0.035	0.235195
1.574	-0.095	0.231794
1.575	-0.15	0.234768
1.576	-0.09	0.234119
1.577	-0.075	0.252208
1.578	-0.2	0.249047
1.579	-0.185	0.254313
1.58	-0.165	0.263954
1.581	-0.11	0.274844
1.582	-0.08	0.261917
1.583	-0.015	0.262521
1.584	0.045	0.268511
1.585	0.095	0.270289
1.586	0.075	0.272964
1.587	0.045	0.276528
1.588	0.005	0.277147
1.589	0.015	0.273424
1.59	-0.005	0.278909
1.591	-0.075	0.296225
1.592	-0.04	0.287553
1.593	0.04	0.275581
1.594	0.105	0.287187
1.595	0.105	0.278798
1.596	0.095	0.284429
1.597	0.095	0.295702
1.598	0.12	0.275143
1.599	0.155	0.254867
1.6	0.175	0.257608
1.601	0.19	0.271544
1.602	0.215	0.288691
1.603	0.24	0.309619
1.604	0.25	0.325455
1.605	0.285	0.333944
1.606	0.28	0.301384
1.607	0.285	0.271146
1.608	0.29	0.251939
1.609	0.28	0.236286
1.61	0.27	0.231109
1.611	0.28	0.224527
1.612	0.285	0.216974
1.613	0.27	0.209522
1.614	0.285	0.209485
1.615	0.285	0.213366
1.616	0.28	0.215105
1.617	0.265	0.221346
1.618	0.245	0.227206
1.619	0.205	0.219561
1.62	0.185	0.205246
1.621	0.155	0.214006
1.622	0.15	0.217387
1.623	0.145	0.22232
1.624	0.1	0.215702
1.625	0.055	0.211306
1.626	0.045	0.2113
1.627	0.09	0.215096
1.628	0.12	0.218979
1.629	0.18	0.219704
1.63	0.23	0.223677
1.631	0.235	0.231109
1.632	0.235	0.234741
1.633	0.22	0.239085
1.634	0.18	0.249472
1.635	0.175	0.293856
1.636	0.11	0.310663
1.637	0.085	0.305044
1.638	0.06	0.299923
1.639	0.025	0.276725
1.64	0	0.2729
1.641	-0.01	0.277964
1.642	-0.01	0.272403
1.643	-0.025	0.27267
1.644	-0.06	0.277617
1.645	-0.07	0.28355
1.646	-0.095	0.283647
1.647	-0.11	0.295531
1.648	-0.135	0.294744
1.649	-0.17	0.295244
1.65	-0.165	0.313903
1.651	-0.17	0.313113
1.652	-0.195	0.297916
1.653	-0.215	0.28295
1.654	-0.26	0.268338
1.655	-0.295	0.254791
1.656	-0.28	0.256015
1.657	-0.305	0.243863
1.658	-0.355	0.230435
1.659	-0.36	0.233804
1.66	-0.39	0.240425
1.661	-0.5	0.246371
1.662	-0.485	0.244289
1.663	-0.49	0.250109
1.664	-0.495	0.246094
1.665	-0.505	0.247183
1.666	-0.46	0.232565
1.667	-0.445	0.241036
1.668	-0.32	0.238906
1.669	-0.22	0.245726
1.67	-0.145	0.255013
1.671	-0.165	0.280232
1.672	-0.215	0.303353
1.673	-0.14	0.292068
1.674	-0.135	0.271388
1.675	-0.11	0.262975
1.676	-0.085	0.253466
1.677	-0.055	0.246292
1.678	-0.03	0.23867
1.679	-0.015	0.237521
1.68	0.01	0.238295
1.681	0.01	0.240672
1.682	-0.04	0.237396
1.683	0.025	0.236628
1.684	0.05	0.242015
1.685	-0.005	0.241902
1.686	0.025	0.243683
1.687	0.06	0.228962
1.688	0.06	0.21286
1.689	0.085	0.20738
1.69	0.145	0.21142
1.691	0.19	0.229279
1.692	0.205	0.249964
1.693	0.205	0.272017
1.694	0.18	0.296258
1.695	0.095	0.310733
1.696	0.055	0.299234
1.697	0	0.317609
1.698	-0.04	0.329632
1.699	-0.075	0.34383
1.7	-0.09	0.332621
1.701	-0.1	0.324322
1.702	-0.105	0.316758
1.703	-0.155	0.304611
1.704	-0.13	0.286633
1.705	-0.115	0.261571
1.706	-0.08	0.246788
1.707	-0.055	0.227089
1.708	-0.065	0.218074
1.709	-0.08	0.211338
1.71	-0.105	0.204036
1.711	-0.075	0.207748
1.712	-0.045	0.215539
1.713	-0.005	0.248188
1.714	0.025	0.239941
1.715	0.095	0.233022
1.716	0.105	0.240409
1.717	0.16	0.254481
1.718	0.17	0.263491
1.719	0.19	0.264262
1.72	0.14	0.267554
1.721	0.09	0.282118
1.722	0.065	0.289148
1.723	0.04	0.312544
1.724	0.065	0.295377
1.725	0.075	0.283225
1.726	0.05	0.281478
1.727	0.035	0.27956
1.728	0.01	0.279193
1.729	-0.01	0.269326
1.73	-0.05	0.263662
1.731	-0.03	0.253499
1.732	0.005	0.246083
1.733	0.01	0.247748
1.734	0.015	0.24174
1.735	0.065	0.259816
1.736	0.125	0.269272
1.737	0.235	0.278678
1.738	0.32	0.299581
1.739	0.325	0.32141
1.74	0.285	0.304062
1.741	0.22	0.282437
1.742	0.025	0.191681
1.743	-0.05	0.189735
1.744	-0.08	0.204092
1.745	-0.13	0.245577
1.746	-0.15	0.29661
1.747	-0.17	0.299584
1.748	-0.2	0.293229
1.749	-0.155	0.310766
1.75	-0.11	0.277509
1.751	-0.12	0.258539
1.752	-0.065	0.276697
1.753	-0.02	0.304844
1.754	-0.065	0.291507
1.755	-0.135	0.297966
1.756	-0.035	0.295213
1.757	-0.05	0.283107
1.758	-0.03	0.27413
1.759	-0.025	0.270234
1.76	-0.02	0.251265
1.761	-0.07	0.234332
1.762	-0.105	0.23459
1.763	-0.03	0.228576
1.764	0.055	0.225088
1.765	0.13	0.228081
1.766	0.18	0.225607
1.767	0.215	0.227775
1.768	0.24	0.231165
1.769	0.26	0.229316
1.77	0.265	0.232014
1.771	0.33	0.229061
1.772	0.35	0.228039
1.773	0.445	0.242782
1.774	0.465	0.242483
1.775	0.475	0.235034
1.776	0.49	0.230108
1.777	0.48	0.228584
1.778	0.5	0.239301
1.779	0.465	0.232505
1.78	0.39	0.213169
1.781	0.325	0.21033
1.782	0.26	0.207291
1.783	0.235	0.206733
1.784	0.205	0.205436
1.785	0.145	0.209222
1.786	0.1	0.213521
1.787	0.04	0.217994
1.788	-0.055	0.218659
1.789	-0.125	0.226473
1.79	-0.14	0.236791
1.791	-0.1	0.2631
1.792	-0.185	0.276444
1.793	-0.17	0.267248
1.794	-0.17	0.2689
1.795	-0.105	0.255505
1.796	-0.08	0.24932
1.797	-0.14	0.258308
1.798	-0.145	0.268882
1.799	-0.115	0.282539
1.8	-0.025	0.23741
1.801	0.045	0.222026
1.802	0.09	0.225279
1.803	0.145	0.224469
1.804	0.105	0.222263
1.805	0.145	0.220604
1.806	0.17	0.220205
1.807	0.17	0.223257
1.808	0.185	0.233917
1.809	0.2	0.248699
1.81	0.255	0.252552
1.811	0.215	0.242809
1.812	0.245	0.247575
1.813	0.145	0.246988
1.814	0.14	0.255549
1.815	0.115	0.254877
1.816	0.065	0.251481
1.817	-0.015	0.235566
1.818	-0.07	0.245986
1.819	-0.005	0.227493
1.82	0.05	0.22545
1.821	0.095	0.231554
1.822	0.21	0.241085
1.823	0.235	0.233531
1.824	0.26	0.226111
1.825	0.285	0.21449
1.826	0.3	0.214355
1.827	0.36	0.21668
1.828	0.385	0.233806
1.829	0.305	0.210016
1.83	0.41	0.247325
1.831	0.38	0.234648
1.832	0.395	0.220391
1.833	0.255	0.21974
1.834	0.27	0.219023
1.835	0.285	0.216928
1.836	0.24	0.221594
1.837	0.2	0.228944
1.838	0.255	0.230241
1.839	0.315	0.238881
1.84	0.3	0.248955
1.841	0.295	0.252971
1.842	0.325	0.255557
1.843	0.41	0.227633
1.844	0.5	0.212294
1.845	0.485	0.200671
1.846	0.49	0.198426
1.847	0.445	0.186301
1.848	0.38	0.174968
1.849	0.36	0.176117
1.85	0.26	0.181617
1.851	0.26	0.182561
1.852	0.2	0.180806
1.853	0.16	0.189521
1.854	0.135	0.205678
1.855	0.145	0.190178
1.856	0.07	0.184408
1.857	0.025	0.190176
1.858	-0.01	0.199708
1.859	0.01	0.225043
1.86	-0.005	0.220399
1.861	-0.075	0.211844
1.862	-0.06	0.203645
1.863	-0.04	0.20632
1.864	0.035	0.219189
1.865	0.055	0.223315
1.866	0.075	0.237412
1.867	0.1	0.23423
1.868	0.145	0.246805
1.869	0.175	0.244866
1.87	0.195	0.22904
1.871	0.18	0.214975
1.872	0.23	0.215589
1.873	0.27	0.217998
1.874	0.42	0.227752
1.875	0.32	0.227049
1.876	0.335	0.229968
1.877	0.27	0.222975
1.878	0.315	0.228055
1.879	0.325	0.220309
1.88	0.285	0.206985
1.881	0.29	0.200149
1.882	0.27	0.201354
1.883	0.29	0.214978
1.884	0.235	0.20235
1.885	0.29	0.203156
1.886	0.28	0.206622
1.887	0.325	0.220869
1.888	0.285	0.212544
1.889	0.295	0.212721
1.89	0.29	0.2153
1.891	0.255	0.212581
1.892	0.235	0.213597
1.893	0.22	0.211699
1.894	0.27	0.188731
1.895	0.23	0.186467
1.896	0.25	0.189961
1.897	0.185	0.193455
1.898	0.12	0.205005
1.899	0.255	0.254345
1.9	0.21	0.281545
1.901	0.205	0.277891
1.902	0.165	0.275547
1.903	0.2	0.258531
1.904	0.22	0.256715
1.905	0.2	0.261831
1.906	0.22	0.280802
1.907	0.27	0.274325
1.908	0.3	0.261536
1.909	0.31	0.280917
1.91	0.405	0.290502
1.911	0.395	0.283259
1.912	0.385	0.286312
1.913	0.375	0.288982
1.914	0.32	0.291886
1.915	0.335	0.288536
1.916	0.35	0.28253
1.917	0.395	0.278865
1.918	0.435	0.276852
1.919	0.44	0.271325
1.92	0.445	0.268059
1.921	0.465	0.258014
1.922	0.475	0.245395
1.923	0.535	0.236185
1.924	0.555	0.228811
1.925	0.525	0.22185
1.926	0.515	0.225155
1.927	0.515	0.223879
1.928	0.52	0.220498
1.929	0.49	0.226688
1.93	0.51	0.222212
1.931	0.555	0.222604
1.932	0.575	0.222435
1.933	0.52	0.231163
1.934	0.565	0.223404
1.935	0.52	0.224789
1.936	0.445	0.220982
1.937	0.435	0.238949
1.938	0.46	0.222362
1.939	0.46	0.231997
1.94	0.46	0.233272
1.941	0.325	0.240456
1.942	0.315	0.237867
1.943	0.28	0.238211
1.944	0.225	0.236801
1.945	0.18	0.239384
1.946	0.135	0.247126
1.947	0.09	0.255315
1.948	0.09	0.254238
1.949	0.07	0.235336
1.95	0.005	0.220698
1.951	0.01	0.198845
1.952	0.03	0.184301
1.953	0.08	0.192046
1.954	0.105	0.196889
1.955	0.125	0.206923
1.956	0.115	0.216163
1.957	0.05	0.231232
1.958	0.085	0.235663
1.959	0.12	0.251483
1.96	0.16	0.278324
1.961	0.235	0.300642
1.962	0.305	0.329336
1.963	0.34	0.288655
1.964	0.33	0.270103
1.965	0.315	0.234292
1.966	0.28	0.224908
1.967	0.295	0.239237
1.968	0.28	0.251217
1.969	0.265	0.261994
1.97	0.28	0.261429
1.971	0.31	0.246915
1.972	0.36	0.227634
1.973	0.385	0.227931
1.974	0.43	0.233387
1.975	0.465	0.232889
1.976	0.475	0.225245
1.977	0.485	0.217318
1.978	0.47	0.213648
1.979	0.47	0.207695
1.98	0.48	0.206029
1.981	0.495	0.203019
1.982	0.51	0.199876
1.983	0.52	0.194101
1.984	0.475	0.19706
1.985	0.465	0.19726
1.986	0.445	0.194398
1.987	0.46	0.192137
1.988	0.48	0.194412
1.989	0.475	0.199205
1.99	0.445	0.204062
1.991	0.505	0.211627
1.992	0.475	0.215853
1.993	0.42	0.220566
1.994	0.435	0.231736
1.995	0.35	0.224482
1.996	0.34	0.229692
1.997	0.385	0.231452
[truncated: 4,003 more rows]
