# Supplementary material for: Mean ocean temperature change and decomposition of the benthic δ 18 O record over the past 4.5 million years
Source: Copernicus journal article supplement (doi:10.5194/cp-21-973-2025), 2025-06-03
Supplement: Supplementary file 6 [file Table S2.xlsx]

## Sheet: Prob stack with trend removed
Age (Ma)	Prob stack with 0.083 trend removed (per mil)	Prob stack unc (per mil)
0	3.18	0.12
0.001	3.18992	0.19
0.002	3.23983	0.16
0.003	3.16975	0.14
0.004	3.23967	0.13
0.005	3.29958	0.18
0.006	3.2995	0.15
0.007	3.35942	0.13
0.008	3.44934	0.21
0.009	3.52925	0.17
0.01	3.64917	0.18
0.011	3.87909	0.2
0.012	3.919	0.24
0.013	4.14892	0.29
0.014	4.20884	0.17
0.015	4.45876	0.3
0.016	4.64867	0.2
0.017	4.69859	0.3
0.018	4.79851	0.25
0.019	4.97842	0.13
0.02	4.93834	0.13
0.021	4.93826	0.1
0.022	4.90817	0.11
0.023	4.92809	0.09
0.024	4.83801	0.13
0.025	4.84793	0.1
0.026	4.82784	0.08
0.027	4.77776	0.13
0.028	4.81768	0.07
0.029	4.66759	0.22
0.03	4.74751	0.07
0.031	4.69743	0.12
0.032	4.65734	0.11
0.033	4.71726	0.11
0.034	4.65718	0.1
0.035	4.63709	0.08
0.036	4.60701	0.09
0.037	4.59693	0.11
0.038	4.44685	0.24
0.039	4.54676	0.09
0.04	4.51668	0.08
0.041	4.4566	0.18
0.042	4.48651	0.08
0.043	4.47643	0.13
0.044	4.50635	0.09
0.045	4.51626	0.12
0.046	4.42618	0.19
0.047	4.4261	0.17
0.048	4.47602	0.12
0.049	4.52593	0.08
0.05	4.39585	0.08
0.051	4.47577	0.06
0.052	4.41568	0.07
0.053	4.3956	0.08
0.054	4.40552	0.15
0.055	4.20543	0.09
0.056	4.34535	0.11
0.057	4.32527	0.13
0.058	4.27519	0.15
0.059	4.3051	0.15
0.06	4.38502	0.11
0.061	4.41494	0.09
0.062	4.30485	0.19
0.063	4.33477	0.13
0.064	4.35469	0.21
0.065	4.5146	0.12
0.066	4.41452	0.17
0.067	4.53444	0.15
0.068	4.44436	0.16
0.069	4.41427	0.28
0.07	4.39419	0.25
0.071	4.47411	0.16
0.072	4.43402	0.09
0.073	4.43394	0.11
0.074	4.27386	0.11
0.075	4.16378	0.15
0.076	4.18369	0.1
0.077	4.18361	0.1
0.078	4.18353	0.15
0.079	4.13344	0.16
0.08	4.04336	0.14
0.081	3.90328	0.11
0.082	3.96319	0.19
0.083	4.00311	0.24
0.084	3.98303	0.28
0.085	4.06295	0.35
0.086	4.12286	0.3
0.087	4.10278	0.26
0.088	4.1327	0.24
0.089	4.21261	0.19
0.09	4.15253	0.14
0.091	4.07245	0.11
0.092	4.02236	0.13
0.093	4.05228	0.14
0.094	3.8022	0.15
0.095	3.97212	0.07
0.096	3.86203	0.11
0.097	3.85195	0.08
0.098	3.73187	0.12
0.099	3.74178	0.23
0.1	3.7617	0.09
0.101	3.88162	0.13
0.102	3.96153	0.12
0.103	3.80145	0.07
0.104	3.88137	0.12
0.105	3.82129	0.19
0.106	3.8112	0.22
0.107	3.90112	0.21
0.108	3.79104	0.33
0.109	3.95095	0.21
0.11	3.99087	0.28
0.111	4.02079	0.17
0.112	3.8907	0.18
0.113	3.95062	0.08
0.114	3.86054	0.09
0.115	3.60045	0.23
0.116	3.53037	0.11
0.117	3.56029	0.16
0.118	3.58021	0.25
0.119	3.24012	0.1
0.12	3.19004	0.11
0.121	3.17996	0.16
0.122	3.13987	0.1
0.123	3.03979	0.13
0.124	3.24971	0.31
0.125	3.02963	0.15
0.126	3.08954	0.12
0.127	3.26946	0.17
0.128	3.49938	0.39
0.129	3.57929	0.41
0.13	3.80921	0.39
0.131	3.88913	0.45
0.132	4.28904	0.32
0.133	4.23896	0.32
0.134	4.48888	0.27
0.135	4.74879	0.16
0.136	4.66871	0.34
0.137	4.83863	0.12
0.138	4.87855	0.06
0.139	4.86846	0.14
0.14	4.80838	0.26
0.141	4.8483	0.12
0.142	4.76821	0.19
0.143	4.85813	0.13
0.144	4.80805	0.09
0.145	4.69796	0.15
0.146	4.73788	0.14
0.147	4.6978	0.15
0.148	4.65772	0.17
0.149	4.59763	0.19
0.15	4.63755	0.08
0.151	4.68747	0.08
0.152	4.62738	0.11
0.153	4.5273	0.24
0.154	4.62722	0.12
0.155	4.39714	0.29
0.156	4.67705	0.08
0.157	4.71697	0.08
0.158	4.60689	0.16
0.159	4.6168	0.21
0.16	4.71672	0.14
0.161	4.71664	0.08
0.162	4.68655	0.1
0.163	4.63647	0.09
0.164	4.58639	0.07
0.165	4.51631	0.07
0.166	4.47622	0.09
0.167	4.50614	0.1
0.168	4.50606	0.14
0.169	4.40597	0.25
0.17	4.42589	0.08
0.171	4.44581	0.08
0.172	4.41572	0.08
0.173	4.38564	0.09
0.174	4.45556	0.17
0.175	4.24547	0.22
0.176	4.35539	0.16
0.177	4.41531	0.24
0.178	4.35523	0.11
0.179	4.36514	0.13
0.18	4.39506	0.07
0.181	4.43498	0.09
0.182	4.38489	0.12
0.183	4.27481	0.18
0.184	4.47473	0.25
0.185	4.51465	0.12
0.186	4.47456	0.12
0.187	4.46448	0.1
0.188	4.4444	0.07
0.189	4.35431	0.1
0.19	4.25423	0.19
0.191	4.14415	0.2
0.192	3.95406	0.28
0.193	4.12398	0.13
0.194	3.9639	0.11
0.195	3.88381	0.24
0.196	3.89373	0.16
0.197	3.78365	0.09
0.198	3.88357	0.1
0.199	3.64348	0.11
0.2	3.5834	0.24
0.201	3.49332	0.11
0.202	3.50323	0.11
0.203	3.58315	0.18
0.204	3.69307	0.27
0.205	3.71299	0.18
0.206	3.6929	0.29
0.207	3.74282	0.14
0.208	3.75274	0.11
0.209	3.66265	0.13
0.21	3.57257	0.17
0.211	3.56249	0.16
0.212	3.7324	0.3
0.213	3.58232	0.12
0.214	3.52224	0.07
0.215	3.51215	0.06
0.216	3.64207	0.2
0.217	3.54199	0.29
0.218	3.68191	0.18
0.219	3.84182	0.32
0.22	3.87174	0.24
0.221	4.14166	0.11
0.222	4.49157	0.18
0.223	4.44149	0.18
0.224	4.39141	0.13
0.225	4.34133	0.08
0.226	4.18124	0.13
0.227	4.15116	0.23
0.228	4.34108	0.13
0.229	3.95099	0.37
0.23	4.27091	0.13
0.231	4.18083	0.21
0.232	4.08074	0.12
0.233	3.83066	0.22
0.234	3.88058	0.1
0.235	3.6405	0.11
0.236	3.60041	0.1
0.237	3.46033	0.07
0.238	3.37025	0.07
0.239	3.33016	0.1
0.24	3.57008	0.25
0.241	3.57	0.26
0.242	3.49991	0.29
0.243	3.68983	0.35
0.244	3.98975	0.32
0.245	4.26966	0.1
0.246	4.35958	0.18
0.247	4.2895	0.18
0.248	4.34942	0.19
0.249	4.38933	0.14
0.25	4.44925	0.14
0.251	4.56917	0.11
0.252	4.60908	0.07
0.253	4.449	0.17
0.254	4.56892	0.08
0.255	4.31883	0.2
0.256	4.49875	0.1
0.257	4.50867	0.11
0.258	4.49859	0.09
0.259	4.4685	0.1
0.26	4.45842	0.1
0.261	4.44834	0.05
0.262	4.42825	0.08
0.263	4.42817	0.19
0.264	4.38809	0.18
0.265	4.48801	0.12
0.266	4.46792	0.12
0.267	4.46784	0.1
0.268	4.23776	0.31
0.269	4.47767	0.12
0.27	4.56759	0.05
0.271	4.53751	0.06
0.272	4.36742	0.22
0.273	4.17734	0.31
0.274	4.42726	0.1
0.275	4.39717	0.08
0.276	4.21709	0.22
0.277	4.36701	0.08
0.278	4.34693	0.18
0.279	4.24684	0.09
0.28	4.09676	0.14
0.281	4.06668	0.07
0.282	3.98659	0.09
0.283	3.91651	0.08
0.284	3.85643	0.1
0.285	3.79635	0.08
0.286	3.78626	0.09
0.287	3.80618	0.15
0.288	3.8361	0.18
0.289	4.00601	0.14
0.29	4.10593	0.15
0.291	4.10585	0.12
0.292	4.18576	0.28
0.293	4.29568	0.13
0.294	4.2556	0.16
0.295	4.30551	0.08
0.296	4.18543	0.27
0.297	4.22535	0.11
0.298	4.09527	0.14
0.299	4.16518	0.12
0.3	4.1151	0.1
0.301	4.07502	0.11
0.302	3.95493	0.1
0.303	3.88485	0.09
0.304	3.86477	0.23
0.305	3.92469	0.13
0.306	4.0046	0.22
0.307	3.92452	0.23
0.308	3.91444	0.14
0.309	3.87435	0.11
0.31	3.79427	0.11
0.311	3.75419	0.08
0.312	3.6441	0.08
0.313	3.59402	0.1
0.314	3.65394	0.23
0.315	3.55385	0.14
0.316	3.69377	0.18
0.317	3.70369	0.33
0.318	3.63361	0.16
0.319	3.53352	0.07
0.32	3.69344	0.24
0.321	3.50336	0.13
0.322	3.45327	0.12
0.323	3.36319	0.12
0.324	3.21311	0.21
0.325	3.24303	0.1
0.326	3.19294	0.11
0.327	3.17286	0.15
0.328	3.14278	0.15
0.329	3.10269	0.09
0.33	3.28261	0.2
0.331	3.20253	0.16
0.332	3.77244	0.53
0.333	3.20236	0.29
0.334	3.36228	0.25
0.335	3.7422	0.27
0.336	3.92211	0.34
0.337	3.97203	0.29
0.338	4.09195	0.3
0.339	4.17186	0.33
0.34	4.50178	0.18
0.341	4.8717	0.21
0.342	4.60161	0.27
0.343	4.73153	0.19
0.344	4.77145	0.19
0.345	4.65137	0.23
0.346	4.71128	0.16
0.347	4.6412	0.16
0.348	4.50112	0.28
0.349	4.72103	0.05
0.35	4.64095	0.09
0.351	4.61087	0.06
0.352	4.50078	0.1
0.353	4.5607	0.1
0.354	4.53062	0.26
0.355	4.52053	0.08
0.356	4.49045	0.13
0.357	4.42037	0.1
0.358	4.43029	0.16
0.359	4.2802	0.28
0.36	4.42012	0.11
0.361	4.45004	0.1
0.362	4.46995	0.09
0.363	4.38987	0.15
0.364	4.44979	0.1
0.365	4.3997	0.1
0.366	4.36962	0.12
0.367	4.46954	0.08
0.368	4.25946	0.26
0.369	4.33937	0.06
0.37	4.24929	0.15
0.371	4.26921	0.04
0.372	4.26912	0.06
0.373	4.17904	0.08
0.374	4.15896	0.06
0.375	4.10887	0.05
0.376	4.16879	0.18
0.377	4.14871	0.19
0.378	4.01863	0.2
0.379	4.10854	0.07
0.38	4.11846	0.09
0.381	4.17838	0.06
0.382	4.03829	0.1
0.383	4.08821	0.06
0.384	4.05813	0.08
0.385	3.94805	0.09
0.386	3.91796	0.25
0.387	3.84788	0.15
0.388	4.0378	0.07
0.389	3.89771	0.08
0.39	3.78763	0.08
0.391	3.79755	0.1
0.392	3.71746	0.17
0.393	3.72738	0.15
0.394	3.7373	0.13
0.395	3.64722	0.19
0.396	3.76713	0.27
0.397	3.38705	0.12
0.398	3.52697	0.16
0.399	3.31688	0.14
0.4	3.2868	0.09
0.401	3.20672	0.1
0.402	3.10663	0.12
0.403	3.08655	0.12
0.404	3.08647	0.1
0.405	3.05639	0.11
0.406	3.0663	0.1
0.407	3.06622	0.14
0.408	3.29614	0.18
0.409	3.08605	0.09
0.41	3.09597	0.08
0.411	3.27589	0.09
0.412	3.2158	0.1
0.413	3.24572	0.06
0.414	3.39564	0.09
0.415	3.40556	0.16
0.416	3.52547	0.1
0.417	3.60539	0.05
0.418	3.62531	0.19
0.419	3.73522	0.05
0.42	3.76514	0.15
0.421	3.97506	0.37
0.422	3.92497	0.19
0.423	3.84489	0.2
0.424	3.79481	0.32
0.425	4.20473	0.29
0.426	4.56464	0.2
0.427	3.89456	0.22
0.428	4.49448	0.26
0.429	4.81439	0.22
0.43	4.86431	0.11
0.431	5.04423	0.13
0.432	5.07414	0.16
0.433	4.93406	0.15
0.434	5.10398	0.18
0.435	5.05389	0.12
0.436	4.95381	0.12
0.437	4.86373	0.08
0.438	4.91365	0.09
0.439	5.00356	0.12
0.44	4.82348	0.26
0.441	4.8934	0.08
0.442	4.88331	0.09
0.443	4.86323	0.08
0.444	4.72315	0.13
0.445	4.66307	0.12
0.446	4.74298	0.08
0.447	4.5229	0.31
0.448	4.69282	0.09
0.449	4.66273	0.09
0.45	4.66265	0.14
0.451	4.51257	0.14
0.452	4.57248	0.16
0.453	4.5124	0.12
0.454	4.61232	0.23
0.455	4.46223	0.1
0.456	4.41215	0.12
0.457	4.59207	0.23
0.458	4.53199	0.12
0.459	4.4519	0.2
0.46	4.53182	0.13
0.461	4.53174	0.12
0.462	4.42165	0.13
0.463	4.51157	0.12
0.464	4.29149	0.33
0.465	4.44141	0.07
0.466	4.43132	0.04
0.467	4.44124	0.08
0.468	4.39116	0.19
0.469	4.39107	0.16
0.47	4.26099	0.18
0.471	4.22091	0.21
0.472	4.25082	0.19
0.473	4.18074	0.29
0.474	4.25066	0.21
0.475	4.31058	0.05
0.476	4.33049	0.07
0.477	4.22041	0.07
0.478	4.31033	0.07
0.479	4.20024	0.21
0.48	4.12016	0.23
0.481	4.14008	0.09
0.482	4.04999	0.05
0.483	3.96991	0.06
0.484	3.84983	0.05
0.485	3.98975	0.19
0.486	3.93966	0.11
0.487	3.84958	0.1
0.488	3.7495	0.12
0.489	3.67941	0.07
0.49	3.65933	0.14
0.491	3.61925	0.18
0.492	3.58916	0.13
0.493	3.54908	0.12
0.494	3.749	0.46
0.495	3.63892	0.07
0.496	3.52883	0.15
0.497	3.59875	0.08
0.498	3.89867	0.32
0.499	3.68858	0.09
0.5	3.6985	0.06
0.501	3.77842	0.09
0.502	3.74833	0.05
0.503	3.71825	0.07
0.504	3.75817	0.09
0.505	3.76809	0.1
0.506	3.788	0.2
0.507	3.86792	0.11
0.508	3.80784	0.17
0.509	3.93775	0.06
0.51	3.96767	0.09
0.511	4.08759	0.08
0.512	4.1875	0.28
0.513	4.15742	0.05
0.514	4.11734	0.12
0.515	4.17725	0.06
0.516	4.13717	0.15
0.517	4.06709	0.11
0.518	4.06701	0.07
0.519	3.95692	0.09
0.52	3.97684	0.05
0.521	3.91676	0.1
0.522	3.90667	0.2
0.523	3.87659	0.05
0.524	3.65651	0.26
0.525	3.76643	0.23
0.526	3.82634	0.1
0.527	3.96626	0.07
0.528	3.89618	0.08
0.529	3.91609	0.07
0.53	3.92601	0.06
0.531	3.90593	0.36
0.532	4.04584	0.09
0.533	4.02576	0.16
0.534	4.12568	0.12
0.535	4.30559	0.18
0.536	4.48551	0.13
0.537	4.18543	0.34
0.538	4.55535	0.12
0.539	4.43526	0.2
0.54	4.38518	0.26
0.541	4.5851	0.21
0.542	4.29501	0.28
0.543	4.53493	0.15
0.544	4.36485	0.27
0.545	4.45477	0.19
0.546	4.48468	0.23
0.547	4.4446	0.1
0.548	4.43452	0.11
0.549	4.41443	0.13
0.55	4.45435	0.11
0.551	4.31427	0.17
0.552	4.47418	0.09
0.553	4.3141	0.17
0.554	4.28402	0.08
0.555	4.24394	0.04
0.556	4.23385	0.06
0.557	4.26377	0.15
0.558	4.25369	0.19
0.559	4.1636	0.06
0.56	4.13352	0.18
0.561	4.09344	0.07
0.562	4.00335	0.12
0.563	4.13327	0.23
0.564	3.98319	0.11
0.565	3.83311	0.1
0.566	3.73302	0.11
0.567	3.86294	0.09
0.568	3.88286	0.09
0.569	4.12277	0.19
0.57	3.83269	0.12
0.571	3.79261	0.14
0.572	3.57252	0.14
0.573	3.60244	0.16
0.574	3.54236	0.15
0.575	3.38228	0.07
0.576	3.47219	0.1
0.577	3.37211	0.06
0.578	3.43203	0.09
0.579	3.36194	0.13
0.58	3.72186	0.44
0.581	3.76178	0.17
0.582	3.93169	0.31
0.583	4.23161	0.27
0.584	4.10153	0.3
0.585	4.37145	0.12
0.586	4.15136	0.19
0.587	3.96128	0.24
0.588	4.0612	0.1
0.589	4.08111	0.17
0.59	4.17103	0.21
0.591	3.86095	0.2
0.592	4.07086	0.19
0.593	4.00078	0.15
0.594	3.9207	0.16
0.595	3.86062	0.12
0.596	3.85053	0.15
0.597	3.83045	0.2
0.598	3.77037	0.26
0.599	4.04028	0.19
0.6	3.9802	0.14
0.601	3.91012	0.145
0.602	3.84003	0.15
0.603	3.78495	0.265
0.604	3.72987	0.38
0.605	3.74479	0.245
0.606	3.7597	0.11
0.607	3.72962	0.14
0.608	3.69954	0.17
0.609	3.58945	0.14
0.61	3.47937	0.11
0.611	3.42429	0.125
0.612	3.3692	0.14
0.613	3.45412	0.15
0.614	3.53904	0.16
0.615	3.53896	0.155
0.616	3.53887	0.15
0.617	3.72379	0.23
0.618	3.90871	0.31
0.619	3.95862	0.225
0.62	4.00854	0.14
0.621	4.05346	0.175
0.622	4.09837	0.21
0.623	4.23829	0.34
0.624	4.37821	0.47
0.625	4.61313	0.36
0.626	4.84804	0.25
0.627	4.90796	0.26
0.628	4.96788	0.27
0.629	5.02779	0.21
0.63	5.08771	0.15
0.631	4.98263	0.21
0.632	4.87754	0.27
0.633	4.84746	0.27
0.634	4.81738	0.27
0.635	4.8823	0.17
0.636	4.94721	0.07
0.637	4.88713	0.12
0.638	4.82705	0.17
0.639	4.83696	0.155
0.64	4.84688	0.14
0.641	4.7868	0.185
0.642	4.72671	0.23
0.643	4.72663	0.15
0.644	4.72655	0.07
0.645	4.66146	0.11
0.646	4.59638	0.15
0.647	4.6413	0.18
0.648	4.68622	0.21
0.649	4.67113	0.23
0.65	4.65605	0.25
0.651	4.66597	0.25
0.652	4.67588	0.25
0.653	4.6508	0.21
0.654	4.62572	0.17
0.655	4.54063	0.165
0.656	4.45555	0.16
0.657	4.51547	0.125
0.658	4.57539	0.09
0.659	4.5253	0.155
0.66	4.47522	0.22
0.661	4.50514	0.18
0.662	4.53505	0.14
0.663	4.45997	0.205
0.664	4.38489	0.27
0.665	4.41981	0.215
0.666	4.45472	0.16
0.667	4.47464	0.22
0.668	4.49456	0.28
0.669	4.45947	0.23
0.67	4.42439	0.18
0.671	4.45431	0.18
0.672	4.48422	0.18
0.673	4.41414	0.175
0.674	4.34406	0.17
0.675	4.37897	0.145
0.676	4.41389	0.12
0.677	4.37381	0.13
0.678	4.33373	0.14
0.679	4.25864	0.15
0.68	4.18356	0.16
0.681	4.14348	0.155
0.682	4.10339	0.15
0.683	4.01831	0.17
0.684	3.93323	0.19
0.685	4.01315	0.205
0.686	4.09306	0.22
0.687	4.00298	0.165
0.688	3.9129	0.11
0.689	3.85781	0.12
0.69	3.80273	0.13
0.691	3.70265	0.125
0.692	3.60256	0.12
0.693	3.67248	0.195
0.694	3.7424	0.27
0.695	3.64732	0.165
0.696	3.55223	0.06
0.697	3.54215	0.1
0.698	3.53207	0.14
0.699	3.52198	0.155
0.7	3.5119	0.17
0.701	3.61182	0.24
0.702	3.71173	0.31
0.703	3.68165	0.23
0.704	3.65157	0.15
0.705	3.70649	0.125
0.706	3.7614	0.1
0.707	3.84132	0.085
0.708	3.92124	0.07
0.709	3.95615	0.115
0.71	3.99107	0.16
0.711	4.05599	0.195
0.712	4.1209	0.23
0.713	4.12582	0.28
0.714	4.13074	0.33
0.715	4.23066	0.275
0.716	4.33057	0.22
0.717	4.45549	0.255
0.718	4.58041	0.29
0.719	4.54532	0.245
0.72	4.51024	0.2
0.721	4.54516	0.22
0.722	4.58007	0.24
0.723	4.54999	0.24
0.724	4.51991	0.24
0.725	4.41983	0.15
0.726	4.31974	0.06
0.727	4.23966	0.09
0.728	4.15958	0.12
0.729	4.06949	0.155
0.73	3.97941	0.19
0.731	3.96933	0.225
0.732	3.95924	0.26
0.733	3.99416	0.195
0.734	4.02908	0.13
0.735	4.03899	0.17
0.736	4.04891	0.21
0.737	4.08383	0.165
0.738	4.11875	0.12
0.739	4.09366	0.225
0.74	4.06858	0.33
0.741	4.0835	0.245
0.742	4.09841	0.16
0.743	4.29833	0.275
0.744	4.49825	0.39
0.745	4.50317	0.31
0.746	4.50808	0.23
0.747	4.493	0.2
0.748	4.47792	0.17
0.749	4.46283	0.155
0.75	4.44775	0.14
0.751	4.41767	0.16
0.752	4.38758	0.18
0.753	4.3525	0.25
0.754	4.31742	0.32
0.755	4.32233	0.22
0.756	4.32725	0.12
0.757	4.29217	0.125
0.758	4.25709	0.13
0.759	4.207	0.11
0.76	4.15692	0.09
0.761	4.01684	0.125
0.762	3.87675	0.16
0.763	4.00667	0.175
0.764	4.13659	0.19
0.765	4.03651	0.14
0.766	3.93642	0.09
0.767	3.93634	0.135
0.768	3.93626	0.18
0.769	3.89617	0.145
0.77	3.85609	0.11
0.771	3.75601	0.095
0.772	3.65592	0.08
0.773	3.66584	0.16
0.774	3.67576	0.24
0.775	3.63568	0.15
0.776	3.59559	0.06
0.777	3.63551	0.19
0.778	3.67543	0.32
0.779	3.56534	0.225
0.78	3.45526	0.13
0.781	3.45018	0.135
0.782	3.44509	0.14
0.783	3.41501	0.14
0.784	3.38493	0.14
0.785	3.40485	0.135
0.786	3.42476	0.13
0.787	3.49468	0.17
0.788	3.5646	0.21
0.789	3.74951	0.265
0.79	3.93443	0.32
0.791	3.99935	0.24
0.792	4.06426	0.16
0.793	4.24418	0.27
0.794	4.4241	0.38
0.795	4.51902	0.275
0.796	4.61393	0.17
0.797	4.64385	0.165
0.798	4.67377	0.16
0.799	4.60868	0.145
0.8	4.5436	0.13
0.801	4.49852	0.125
0.802	4.45343	0.12
0.803	4.42335	0.11
0.804	4.39327	0.1
0.805	4.34319	0.145
0.806	4.2931	0.19
0.807	4.28302	0.145
0.808	4.27294	0.1
0.809	4.17785	0.145
0.81	4.08277	0.19
0.811	4.11269	0.21
0.812	4.1426	0.23
0.813	3.91752	0.32
0.814	3.69244	0.41
0.815	3.78236	0.32
0.816	3.87227	0.23
0.817	3.82219	0.185
0.818	3.77211	0.14
0.819	3.76202	0.185
0.82	3.75194	0.23
0.821	3.80186	0.275
0.822	3.85177	0.32
0.823	3.79669	0.305
0.824	3.74161	0.29
0.825	3.88153	0.275
0.826	4.02144	0.26
0.827	3.93636	0.19
0.828	3.85128	0.12
0.829	3.88119	0.15
0.83	3.91111	0.18
0.831	3.82603	0.15
0.832	3.74094	0.12
0.833	3.73586	0.175
0.834	3.73078	0.23
0.835	3.75069	0.195
0.836	3.77061	0.16
0.837	3.78553	0.18
0.838	3.80045	0.2
0.839	3.77536	0.15
0.84	3.75028	0.1
0.841	3.7302	0.195
0.842	3.71011	0.29
0.843	3.71503	0.18
0.844	3.71995	0.07
0.845	3.65487	0.07
0.846	3.58978	0.07
0.847	3.5497	0.105
0.848	3.50962	0.14
0.849	3.42953	0.12
0.85	3.34945	0.1
0.851	3.47937	0.13
0.852	3.60928	0.16
0.853	3.6642	0.255
0.854	3.71912	0.35
0.855	3.64904	0.245
0.856	3.57895	0.14
0.857	3.47387	0.1
0.858	3.36879	0.06
0.859	3.3537	0.105
0.86	3.33862	0.15
0.861	3.39854	0.225
0.862	3.45845	0.3
0.863	3.38337	0.25
0.864	3.30829	0.2
0.865	3.51321	0.205
0.866	3.71812	0.21
0.867	3.99804	0.21
0.868	4.27796	0.21
0.869	4.27287	0.25
0.87	4.26779	0.29
0.871	4.44271	0.21
0.872	4.61762	0.13
0.873	4.59254	0.16
0.874	4.56746	0.19
0.875	4.55738	0.19
0.876	4.54729	0.19
0.877	4.42221	0.305
0.878	4.29713	0.42
0.879	4.41704	0.26
0.88	4.53696	0.1
0.881	4.44688	0.195
0.882	4.35679	0.29
0.883	4.37171	0.25
0.884	4.38663	0.21
0.885	4.40655	0.19
0.886	4.42646	0.17
0.887	4.39638	0.16
0.888	4.3663	0.15
0.889	4.33121	0.15
0.89	4.29613	0.15
0.891	4.22105	0.23
0.892	4.14596	0.31
0.893	4.23588	0.195
0.894	4.3258	0.08
0.895	4.31571	0.075
0.896	4.30563	0.07
0.897	4.20055	0.115
0.898	4.09547	0.16
0.899	4.09038	0.16
0.9	4.0853	0.16
0.901	4.07022	0.135
0.902	4.05513	0.11
0.903	4.03005	0.11
0.904	4.00497	0.11
0.905	3.99989	0.105
0.906	3.9948	0.1
0.907	3.93972	0.13
0.908	3.88464	0.16
0.909	3.89955	0.16
0.91	3.91447	0.16
0.911	3.91439	0.135
0.912	3.9143	0.11
0.913	3.93422	0.15
0.914	3.95414	0.19
0.915	3.91906	0.275
0.916	3.88397	0.36
0.917	4.11389	0.275
0.918	4.34381	0.19
0.919	4.40372	0.17
0.92	4.46364	0.15
0.921	4.40356	0.14
0.922	4.34347	0.13
0.923	4.32839	0.1
0.924	4.31331	0.07
0.925	4.24323	0.085
0.926	4.17314	0.1
0.927	4.16306	0.125
0.928	4.15298	0.15
0.929	4.00789	0.165
0.93	3.86281	0.18
0.931	3.90273	0.165
0.932	3.94264	0.15
0.933	3.95256	0.145
0.934	3.96248	0.14
0.935	3.8974	0.12
0.936	3.83231	0.1
0.937	3.70723	0.15
0.938	3.58215	0.2
0.939	3.64706	0.125
0.94	3.71198	0.05
0.941	3.6369	0.105
0.942	3.56181	0.16
0.943	3.51673	0.135
0.944	3.47165	0.11
0.945	3.51157	0.205
0.946	3.55148	0.3
0.947	3.4364	0.21
0.948	3.32132	0.12
0.949	3.28123	0.105
0.95	3.24115	0.09
0.951	3.19607	0.1
0.952	3.15098	0.11
0.953	3.2259	0.19
0.954	3.30082	0.27
0.955	3.25074	0.22
0.956	3.20065	0.17
0.957	3.34557	0.26
0.958	3.49049	0.35
0.959	3.7854	0.36
0.96	4.08032	0.37
0.961	4.14524	0.3
0.962	4.21015	0.23
0.963	4.30507	0.225
0.964	4.39999	0.22
0.965	4.27491	0.225
0.966	4.14982	0.23
0.967	4.17974	0.175
0.968	4.20966	0.12
0.969	4.11957	0.09
0.97	4.02949	0.06
0.971	3.90441	0.095
0.972	3.77932	0.13
0.973	3.82924	0.17
0.974	3.87916	0.21
0.975	3.80408	0.16
0.976	3.72899	0.11
0.977	3.66891	0.125
0.978	3.60883	0.14
0.979	3.59374	0.18
0.98	3.57866	0.22
0.981	3.66858	0.165
0.982	3.75849	0.11
0.983	3.87841	0.195
0.984	3.99833	0.28
0.985	4.06325	0.25
0.986	4.12816	0.22
0.987	4.07808	0.18
0.988	4.028	0.14
0.989	4.00791	0.12
0.99	3.98783	0.1
0.991	3.92275	0.115
0.992	3.85766	0.13
0.993	3.84258	0.175
0.994	3.8275	0.22
0.995	3.78742	0.17
0.996	3.74733	0.12
0.997	3.73225	0.13
0.998	3.71717	0.14
0.999	3.72208	0.15
1	3.727	0.16
1.001	3.79692	0.125
1.002	3.86683	0.09
1.003	4.04675	0.125
1.004	4.22667	0.16
1.005	4.17659	0.14
1.006	4.1265	0.12
1.007	4.09142	0.135
1.008	4.05634	0.15
1.009	4.01625	0.18
1.01	3.97617	0.21
1.011	3.97109	0.16
1.012	3.966	0.11
1.013	3.88592	0.14
1.014	3.80584	0.17
1.015	3.69576	0.245
1.016	3.58567	0.32
1.017	3.62059	0.225
1.018	3.65551	0.13
1.019	3.68042	0.14
1.02	3.70534	0.15
1.021	3.66026	0.15
1.022	3.61517	0.15
1.023	3.66009	0.225
1.024	3.70501	0.3
1.025	3.71493	0.35
1.026	3.72484	0.4
1.027	3.68476	0.26
1.028	3.64468	0.12
1.029	3.64459	0.125
1.03	3.64451	0.13
1.031	3.74943	0.135
1.032	3.85434	0.14
1.033	3.94426	0.145
1.034	4.03418	0.15
1.035	4.1241	0.12
1.036	4.21401	0.09
1.037	4.27393	0.115
1.038	4.33385	0.14
1.039	4.20876	0.225
1.04	4.08368	0.31
1.041	4.1836	0.235
1.042	4.28351	0.16
1.043	4.27343	0.185
1.044	4.26335	0.21
1.045	4.23327	0.2
1.046	4.20318	0.19
1.047	4.1781	0.165
1.048	4.15302	0.14
1.049	4.16293	0.145
1.05	4.17285	0.15
1.051	4.17277	0.17
1.052	4.17268	0.19
1.053	4.1276	0.145
1.054	4.08252	0.1
1.055	4.08744	0.125
1.056	4.09235	0.15
1.057	4.03227	0.19
1.058	3.97219	0.23
1.059	3.8871	0.205
1.06	3.80202	0.18
1.061	3.76194	0.21
1.062	3.72185	0.24
1.063	3.63677	0.315
1.064	3.55169	0.39
1.065	3.48661	0.26
1.066	3.42152	0.13
1.067	3.32144	0.145
1.068	3.22136	0.16
1.069	3.22127	0.115
1.07	3.22119	0.07
1.071	3.18111	0.12
1.072	3.14102	0.17
1.073	3.20594	0.195
1.074	3.27086	0.22
1.075	3.24578	0.19
1.076	3.22069	0.16
1.077	3.36561	0.255
1.078	3.51053	0.35
1.079	3.40544	0.28
1.08	3.30036	0.21
1.081	3.48028	0.16
1.082	3.66019	0.11
1.083	3.63011	0.15
1.084	3.60003	0.19
1.085	3.62995	0.145
1.086	3.65986	0.1
1.087	3.70978	0.125
1.088	3.7597	0.15
1.089	3.77461	0.135
1.09	3.78953	0.12
1.091	3.84445	0.145
1.092	3.89936	0.17
1.093	3.87428	0.195
1.094	3.8492	0.22
1.095	3.92911	0.165
1.096	4.00903	0.11
1.097	4.07395	0.165
1.098	4.13887	0.22
1.099	4.10878	0.19
1.1	4.0787	0.16
1.101	4.06862	0.17
1.102	4.05853	0.18
1.103	3.94345	0.235
1.104	3.82837	0.29
1.105	3.78829	0.255
1.106	3.7482	0.22
1.107	3.62312	0.185
1.108	3.49804	0.15
1.109	3.64295	0.2
1.11	3.78787	0.25
1.111	3.76279	0.175
1.112	3.7377	0.1
1.113	3.83762	0.16
1.114	3.93754	0.22
1.115	3.95745	0.175
1.116	3.97737	0.13
1.117	4.04229	0.155
1.118	4.10721	0.18
1.119	4.11212	0.215
1.12	4.11704	0.25
1.121	4.22696	0.21
1.122	4.33687	0.17
1.123	4.33179	0.17
1.124	4.32671	0.17
1.125	4.28163	0.15
1.126	4.23654	0.13
1.127	4.26646	0.115
1.128	4.29638	0.1
1.129	4.22629	0.095
1.13	4.15621	0.09
1.131	4.01613	0.165
1.132	3.87604	0.24
1.133	3.98096	0.18
1.134	4.08588	0.12
1.135	4.0158	0.14
1.136	3.94571	0.16
1.137	3.89063	0.185
1.138	3.83555	0.21
1.139	3.85546	0.175
1.14	3.87538	0.14
1.141	3.8203	0.185
1.142	3.76521	0.23
1.143	3.81013	0.18
1.144	3.85505	0.13
1.145	3.81497	0.17
1.146	3.77488	0.21
1.147	3.7548	0.215
1.148	3.73472	0.22
1.149	3.71963	0.145
1.15	3.70455	0.07
1.151	3.63447	0.085
1.152	3.56438	0.1
1.153	3.5543	0.1
1.154	3.54422	0.1
1.155	3.55414	0.17
1.156	3.56405	0.24
1.157	3.51397	0.19
1.158	3.46389	0.14
1.159	3.5188	0.155
1.16	3.57372	0.17
1.161	3.51364	0.175
1.162	3.45355	0.18
1.163	3.47847	0.13
1.164	3.50339	0.08
1.165	3.43831	0.075
1.166	3.37322	0.07
1.167	3.35314	0.115
1.168	3.33306	0.16
1.169	3.37797	0.14
1.17	3.42289	0.12
1.171	3.46281	0.115
1.172	3.50272	0.11
1.173	3.57264	0.09
1.174	3.64256	0.07
1.175	3.63248	0.185
1.176	3.62239	0.3
1.177	3.55231	0.225
1.178	3.48223	0.15
1.179	3.43714	0.22
1.18	3.39206	0.29
1.181	3.43698	0.195
1.182	3.48189	0.1
1.183	3.56181	0.12
1.184	3.64173	0.14
1.185	3.60665	0.165
1.186	3.57156	0.19
1.187	3.56648	0.145
1.188	3.5614	0.1
1.189	3.65131	0.17
1.19	3.74123	0.24
1.191	3.91615	0.17
1.192	4.09106	0.1
1.193	4.09598	0.09
1.194	4.1009	0.08
1.195	4.16582	0.115
1.196	4.23073	0.15
1.197	4.26065	0.145
1.198	4.29057	0.14
1.199	4.36048	0.13
1.2	4.4304	0.12
1.201	4.27532	0.2
1.202	4.12023	0.28
1.203	4.23515	0.185
1.204	4.35007	0.09
1.205	4.22499	0.2
1.206	4.0999	0.31
1.207	4.18482	0.2
1.208	4.26974	0.09
1.209	4.20965	0.095
1.21	4.14957	0.1
1.211	4.04449	0.175
1.212	3.9394	0.25
1.213	3.99932	0.19
1.214	4.05924	0.13
1.215	3.97416	0.165
1.216	3.88907	0.2
1.217	3.80899	0.29
1.218	3.72891	0.38
1.219	3.83882	0.245
1.22	3.94874	0.11
1.221	3.87366	0.155
1.222	3.79857	0.2
1.223	3.68849	0.18
1.224	3.57841	0.16
1.225	3.51333	0.155
1.226	3.44824	0.15
1.227	3.44316	0.145
1.228	3.43808	0.14
1.229	3.35299	0.11
1.23	3.26791	0.08
1.231	3.23283	0.105
1.232	3.19774	0.13
1.233	3.21266	0.12
1.234	3.22758	0.11
1.235	3.2475	0.145
1.236	3.26741	0.18
1.237	3.26733	0.165
1.238	3.26725	0.15
1.239	3.25716	0.195
1.24	3.24708	0.24
1.241	3.347	0.27
1.242	3.44691	0.3
1.243	3.52183	0.265
1.244	3.59675	0.23
1.245	3.80667	0.18
1.246	4.01658	0.13
1.247	4.1215	0.12
1.248	4.22642	0.11
1.249	4.21633	0.15
1.25	4.20625	0.19
1.251	4.17117	0.225
1.252	4.13608	0.26
1.253	4.206	0.175
1.254	4.27592	0.09
1.255	4.19083	0.085
1.256	4.10575	0.08
1.257	4.03567	0.125
1.258	3.96559	0.17
1.259	3.8805	0.235
1.26	3.79542	0.3
1.261	3.85534	0.185
1.262	3.91525	0.07
1.263	3.80517	0.125
1.264	3.69509	0.18
1.265	3.72501	0.115
1.266	3.75492	0.05
1.267	3.71484	0.08
1.268	3.67476	0.11
1.269	3.65967	0.13
1.27	3.64459	0.15
1.271	3.57951	0.14
1.272	3.51442	0.13
1.273	3.53434	0.105
1.274	3.55426	0.08
1.275	3.52418	0.1
1.276	3.49409	0.12
1.277	3.55401	0.145
1.278	3.61393	0.17
1.279	3.57884	0.205
1.28	3.54376	0.24
1.281	3.56868	0.285
1.282	3.59359	0.33
1.283	3.67351	0.2
1.284	3.75343	0.07
1.285	3.84335	0.14
1.286	3.93326	0.21
1.287	4.06318	0.16
1.288	4.1931	0.11
1.289	4.21801	0.115
1.29	4.24293	0.12
1.291	4.16785	0.1
1.292	4.09276	0.08
1.293	3.93768	0.135
1.294	3.7826	0.19
1.295	3.91752	0.155
1.296	4.05243	0.12
1.297	3.97235	0.115
1.298	3.89227	0.11
1.299	3.90718	0.125
1.3	3.9221	0.14
1.301	3.86702	0.165
1.302	3.81193	0.19
1.303	3.75685	0.18
1.304	3.70177	0.17
1.305	3.62669	0.185
1.306	3.5516	0.2
1.307	3.59152	0.155
1.308	3.63144	0.11
1.309	3.60635	0.105
1.31	3.58127	0.1
1.311	3.55619	0.105
1.312	3.5311	0.11
1.313	3.48102	0.19
1.314	3.43094	0.27
1.315	3.44085	0.205
1.316	3.45077	0.14
1.317	3.46069	0.215
1.318	3.47061	0.29
1.319	3.53052	0.265
1.32	3.59044	0.24
1.321	3.66036	0.185
1.322	3.73027	0.13
1.323	3.76019	0.14
1.324	3.79011	0.15
1.325	3.82003	0.16
1.326	3.84994	0.17
1.327	3.82486	0.21
1.328	3.79978	0.25
1.329	3.89469	0.16
1.33	3.98961	0.07
1.331	3.98453	0.09
1.332	3.97944	0.11
1.333	3.99436	0.18
1.334	4.00928	0.25
1.335	4.01419	0.16
1.336	4.01911	0.07
1.337	3.97903	0.12
1.338	3.93895	0.17
1.339	3.96386	0.22
1.34	3.98878	0.27
1.341	3.9037	0.19
1.342	3.81861	0.11
1.343	3.68853	0.175
1.344	3.55845	0.24
1.345	3.59337	0.245
1.346	3.62828	0.25
1.347	3.5082	0.285
1.348	3.38812	0.32
1.349	3.38803	0.255
1.35	3.38795	0.19
1.351	3.29787	0.19
1.352	3.20778	0.19
1.353	3.1877	0.19
1.354	3.16762	0.19
1.355	3.18754	0.14
1.356	3.20745	0.09
1.357	3.23737	0.125
1.358	3.26729	0.16
1.359	3.3572	0.135
1.36	3.44712	0.11
1.361	3.52204	0.165
1.362	3.59695	0.22
1.363	3.68687	0.14
1.364	3.77679	0.06
1.365	3.80671	0.08
1.366	3.83662	0.1
1.367	3.92154	0.085
1.368	4.00646	0.07
1.369	3.97137	0.145
1.37	3.93629	0.22
1.371	3.99121	0.13
1.372	4.04612	0.04
1.373	3.99604	0.095
1.374	3.94596	0.15
1.375	3.91088	0.2
1.376	3.87579	0.25
1.377	4.00571	0.17
1.378	4.13563	0.09
1.379	4.04054	0.1
1.38	3.94546	0.11
1.381	3.85538	0.125
1.382	3.76529	0.14
1.383	3.75021	0.125
1.384	3.73513	0.11
1.385	3.64505	0.095
1.386	3.55496	0.08
1.387	3.50488	0.16
1.388	3.4548	0.24
1.389	3.47971	0.19
1.39	3.50463	0.14
1.391	3.44955	0.16
1.392	3.39446	0.18
1.393	3.49938	0.305
1.394	3.6043	0.43
1.395	3.54422	0.32
1.396	3.48413	0.21
1.397	3.45405	0.155
1.398	3.42397	0.1
1.399	3.44888	0.23
1.4	3.4738	0.36
1.401	3.56372	0.335
1.402	3.65363	0.31
1.403	3.65855	0.26
1.404	3.66347	0.21
1.405	3.70339	0.255
1.406	3.7433	0.3
1.407	3.72322	0.28
1.408	3.70314	0.26
1.409	3.86805	0.165
1.41	4.03297	0.07
1.411	4.08789	0.1
1.412	4.1428	0.13
1.413	4.09772	0.13
1.414	4.05264	0.13
1.415	3.99756	0.24
1.416	3.94247	0.35
1.417	3.85239	0.285
1.418	3.76231	0.22
1.419	3.81722	0.14
1.42	3.87214	0.06
1.421	3.85706	0.08
1.422	3.84197	0.1
1.423	3.77189	0.09
1.424	3.70181	0.08
1.425	3.63673	0.095
1.426	3.57164	0.11
1.427	3.51156	0.165
1.428	3.45148	0.22
1.429	3.42639	0.155
1.43	3.40131	0.09
1.431	3.34123	0.1
1.432	3.28114	0.11
1.433	3.26606	0.11
1.434	3.25098	0.11
1.435	3.2359	0.11
1.436	3.22081	0.11
1.437	3.13073	0.175
1.438	3.04065	0.24
1.439	3.11056	0.16
1.44	3.18048	0.08
1.441	3.1454	0.16
1.442	3.11031	0.24
1.443	3.17523	0.16
1.444	3.24015	0.08
1.445	3.19507	0.125
1.446	3.14998	0.17
1.447	3.1649	0.215
1.448	3.17982	0.26
1.449	3.17973	0.205
1.45	3.17965	0.15
1.451	3.25957	0.255
1.452	3.33948	0.36
1.453	3.6294	0.415
1.454	3.91932	0.47
1.455	4.02424	0.33
1.456	4.12915	0.19
1.457	4.15907	0.165
1.458	4.18899	0.14
1.459	4.1289	0.2
1.46	4.06882	0.26
1.461	4.06374	0.23
1.462	4.05865	0.2
1.463	4.00357	0.16
1.464	3.94849	0.12
1.465	3.81841	0.135
1.466	3.68832	0.15
1.467	3.73824	0.175
1.468	3.78816	0.2
1.469	3.66807	0.32
1.47	3.54799	0.44
1.471	3.59791	0.335
1.472	3.64782	0.23
1.473	3.53774	0.195
1.474	3.42766	0.16
1.475	3.39758	0.2
1.476	3.36749	0.24
1.477	3.36241	0.225
1.478	3.35733	0.21
1.479	3.30224	0.17
1.48	3.24716	0.13
1.481	3.24708	0.09
1.482	3.24699	0.05
1.483	3.26691	0.13
1.484	3.28683	0.21
1.485	3.34175	0.215
1.486	3.39666	0.22
1.487	3.29658	0.185
1.488	3.1965	0.15
1.489	3.25641	0.245
1.49	3.31633	0.34
1.491	3.57125	0.27
1.492	3.82616	0.2
1.493	3.89608	0.2
1.494	3.966	0.2
1.495	4.11092	0.155
1.496	4.25583	0.11
1.497	4.18575	0.185
1.498	4.11567	0.26
1.499	4.15058	0.225
1.5	4.1855	0.19
1.501	4.14208	0.2
1.502	4.09867	0.21
1.503	4.05525	0.22
1.504	3.94017	0.3
1.505	3.82509	0.38
1.506	3.885	0.276667
1.507	3.94492	0.173333
1.508	4.00484	0.07
1.509	3.93475	0.085
1.51	3.86467	0.1
1.511	3.81792	0.12
1.512	3.77117	0.14
1.513	3.72442	0.16
1.514	3.69934	0.165
1.515	3.67426	0.17
1.516	3.62417	0.163333
1.517	3.57409	0.156667
1.518	3.52401	0.15
1.519	3.47892	0.15
1.52	3.43384	0.15
1.521	3.48376	0.13
1.522	3.53367	0.11
1.523	3.58359	0.09
1.524	3.63851	0.14
1.525	3.69343	0.19
1.526	3.72334	0.146667
1.527	3.75326	0.103333
1.528	3.78318	0.06
1.529	3.86309	0.18
1.53	3.94301	0.3
1.531	4.00626	0.236667
1.532	4.06951	0.173333
1.533	4.13276	0.11
1.534	4.21268	0.2
1.535	4.2926	0.29
1.536	4.24918	0.283333
1.537	4.20576	0.276667
1.538	4.16235	0.27
1.539	4.20226	0.225
1.54	4.24218	0.18
1.541	4.18876	0.143333
1.542	4.13535	0.106667
1.543	4.08193	0.07
1.544	3.99185	0.115
1.545	3.90177	0.16
1.546	3.86168	0.143333
1.547	3.8216	0.126667
1.548	3.78152	0.11
1.549	3.68143	0.2
1.55	3.58135	0.29
1.551	3.61793	0.246667
1.552	3.65452	0.203333
1.553	3.6911	0.16
1.554	3.67102	0.195
1.555	3.65094	0.23
1.556	3.64752	0.216667
1.557	3.6441	0.203333
1.558	3.64069	0.19
1.559	3.6106	0.155
1.56	3.58052	0.12
1.561	3.55044	0.12
1.562	3.52035	0.12
1.563	3.49027	0.12
1.564	3.47519	0.125
1.565	3.46011	0.13
1.566	3.48669	0.17
1.567	3.51327	0.21
1.568	3.53986	0.25
1.569	3.61477	0.205
1.57	3.68969	0.16
1.571	3.77961	0.15
1.572	3.86952	0.14
1.573	3.95944	0.13
1.574	4.05936	0.125
1.575	4.15928	0.12
1.576	4.14586	0.123333
1.577	4.13244	0.126667
1.578	4.11903	0.13
1.579	4.01894	0.13
1.58	3.91886	0.13
1.581	3.89211	0.203333
1.582	3.86536	0.276667
1.583	3.83861	0.35
1.584	3.77353	0.245
1.585	3.70845	0.14
1.586	3.68836	0.133333
1.587	3.66828	0.126667
1.588	3.6482	0.12
1.589	3.62811	0.15
1.59	3.60803	0.18
1.591	3.65795	0.203333
1.592	3.70786	0.226667
1.593	3.75778	0.25
1.594	3.6777	0.195
1.595	3.59762	0.14
1.596	3.5742	0.11
1.597	3.55078	0.08
1.598	3.52737	0.05
1.599	3.47728	0.085
1.6	3.4272	0.12
1.601	3.40045	0.166667
1.602	3.3737	0.213333
1.603	3.34695	0.26
1.604	3.36187	0.23
1.605	3.37679	0.2
1.606	3.4167	0.203333
1.607	3.45662	0.206667
1.608	3.49654	0.21
1.609	3.57145	0.22
1.61	3.64637	0.23
1.611	3.68295	0.173333
1.612	3.71954	0.116667
1.613	3.75612	0.06
1.614	3.72604	0.095
1.615	3.69596	0.13
1.616	3.70921	0.166667
1.617	3.72246	0.203333
1.618	3.73571	0.24
1.619	3.64062	0.17
1.62	3.54554	0.1
1.621	3.52212	0.1
1.622	3.49871	0.1
1.623	3.47529	0.1
1.624	3.51521	0.11
1.625	3.55513	0.12
1.626	3.63171	0.186667
1.627	3.70829	0.253333
1.628	3.78488	0.32
1.629	3.62979	0.28
1.63	3.47471	0.24
1.631	3.44463	0.22
1.632	3.41454	0.2
1.633	3.38446	0.18
1.634	3.44938	0.28
1.635	3.5143	0.38
1.636	3.46421	0.286667
1.637	3.41413	0.193333
1.638	3.36405	0.1
1.639	3.51896	0.17
1.64	3.67388	0.24
1.641	3.6738	0.28
1.642	3.67371	0.32
1.643	3.67363	0.36
1.644	3.77355	0.295
1.645	3.87347	0.23
1.646	3.90005	0.213333
1.647	3.92663	0.196667
1.648	3.95322	0.18
1.649	4.01813	0.19
1.65	4.08305	0.2
1.651	4.08297	0.19
1.652	4.08288	0.18
1.653	4.0828	0.17
1.654	4.11772	0.14
1.655	4.15264	0.11
1.656	4.11255	0.12
1.657	4.07247	0.13
1.658	4.03239	0.14
1.659	4.0273	0.145
1.66	4.02222	0.15
1.661	4.00214	0.153333
1.662	3.98205	0.156667
1.663	3.96197	0.16
1.664	3.96689	0.145
1.665	3.97181	0.13
1.666	3.92172	0.153333
1.667	3.87164	0.176667
1.668	3.82156	0.2
1.669	3.79147	0.175
1.67	3.76139	0.15
1.671	3.71797	0.133333
1.672	3.67456	0.116667
1.673	3.63114	0.1
1.674	3.57106	0.105
1.675	3.51098	0.11
1.676	3.53756	0.12
1.677	3.56414	0.13
1.678	3.59073	0.14
1.679	3.54564	0.135
1.68	3.50056	0.13
1.681	3.48381	0.12
1.682	3.46706	0.11
1.683	3.45031	0.1
1.684	3.46023	0.09
1.685	3.47015	0.08
1.686	3.48006	0.14
1.687	3.48998	0.2
1.688	3.4999	0.26
1.689	3.53481	0.215
1.69	3.56973	0.17
1.691	3.59965	0.183333
1.692	3.62956	0.196667
1.693	3.65948	0.21
1.694	3.7144	0.2
1.695	3.76932	0.19
1.696	3.74257	0.16
1.697	3.71582	0.13
1.698	3.68907	0.1
1.699	3.75898	0.21
1.7	3.8289	0.32
1.701	3.90882	0.273333
1.702	3.98873	0.226667
1.703	4.06865	0.18
1.704	4.05357	0.16
1.705	4.03849	0.14
1.706	4.00507	0.146667
1.707	3.97165	0.153333
1.708	3.93824	0.16
1.709	3.87815	0.13
1.71	3.81807	0.1
1.711	3.74132	0.143333
1.712	3.66457	0.186667
1.713	3.58782	0.23
1.714	3.54774	0.22
1.715	3.50766	0.21
1.716	3.47757	0.27
1.717	3.44749	0.33
1.718	3.41741	0.39
1.719	3.41232	0.315
1.72	3.40724	0.24
1.721	3.47382	0.216667
1.722	3.54041	0.193333
1.723	3.60699	0.17
1.724	3.61191	0.185
1.725	3.61683	0.2
1.726	3.62341	0.206667
1.727	3.62999	0.213333
1.728	3.63658	0.22
1.729	3.61149	0.17
1.73	3.58641	0.12
1.731	3.66966	0.17
1.732	3.75291	0.22
1.733	3.83616	0.27
1.734	3.67608	0.17
1.735	3.516	0.07
1.736	3.51591	0.116667
1.737	3.51583	0.163333
1.738	3.51575	0.21
1.739	3.56066	0.27
1.74	3.60558	0.33
1.741	3.65883	0.326667
1.742	3.71208	0.323333
1.743	3.76533	0.32
1.744	3.88525	0.275
1.745	4.00517	0.23
1.746	3.98508	0.23
1.747	3.965	0.23
1.748	3.94492	0.23
1.749	3.87483	0.21
1.75	3.80475	0.19
1.751	3.758	0.16
1.752	3.71125	0.13
1.753	3.6645	0.1
1.754	3.58442	0.155
1.755	3.50434	0.21
1.756	3.55092	0.213333
1.757	3.5975	0.216667
1.758	3.64409	0.22
1.759	3.574	0.15
1.76	3.50392	0.08
1.761	3.4405	0.156667
1.762	3.37709	0.233333
1.763	3.31367	0.31
1.764	3.27359	0.28
1.765	3.23351	0.25
1.766	3.25676	0.246667
1.767	3.28001	0.243333
1.768	3.30326	0.24
1.769	3.29317	0.175
1.77	3.28309	0.11
1.771	3.28967	0.106667
1.772	3.29626	0.103333
1.773	3.30284	0.1
1.774	3.34776	0.12
1.775	3.39268	0.14
1.776	3.43259	0.15
1.777	3.47251	0.16
1.778	3.51243	0.17
1.779	3.51234	0.19
1.78	3.51226	0.21
1.781	3.55884	0.243333
1.782	3.60543	0.276667
1.783	3.65201	0.31
1.784	3.65193	0.235
1.785	3.65185	0.16
1.786	3.64176	0.18
1.787	3.63168	0.2
1.788	3.6216	0.22
1.789	3.73651	0.175
1.79	3.85143	0.13
1.791	3.90801	0.136667
1.792	3.9646	0.143333
1.793	4.02118	0.15
1.794	3.9661	0.145
1.795	3.91101	0.14
1.796	3.8976	0.156667
1.797	3.88418	0.173333
1.798	3.87077	0.19
1.799	3.81568	0.185
1.8	3.7606	0.18
1.801	3.72385	0.163333
1.802	3.6871	0.146667
1.803	3.65035	0.13
1.804	3.57527	0.14
1.805	3.50019	0.15
1.806	3.5001	0.14
1.807	3.50002	0.13
1.808	3.49994	0.12
1.809	3.39485	0.1
1.81	3.28977	0.08
1.811	3.36302	0.0966667
1.812	3.43627	0.113333
1.813	3.50952	0.13
1.814	3.58944	0.21
1.815	3.66936	0.29
1.816	3.65594	0.29
1.817	3.64252	0.29
1.818	3.62911	0.29
1.819	3.56402	0.26
1.82	3.49894	0.23
1.821	3.44219	0.2
1.822	3.38544	0.17
1.823	3.32869	0.14
1.824	3.32361	0.155
1.825	3.31853	0.17
1.826	3.32844	0.16
1.827	3.33836	0.15
1.828	3.34828	0.14
1.829	3.36819	0.195
1.83	3.38811	0.25
1.831	3.40136	0.29
1.832	3.41461	0.33
1.833	3.42786	0.37
1.834	3.54278	0.33
1.835	3.6577	0.29
1.836	3.65428	0.283333
1.837	3.65086	0.276667
1.838	3.64745	0.27
1.839	3.60236	0.285
1.84	3.55728	0.3
1.841	3.56386	0.303333
1.842	3.57045	0.306667
1.843	3.57703	0.31
1.844	3.54695	0.27
1.845	3.51687	0.23
1.846	3.49678	0.22
1.847	3.4767	0.21
1.848	3.45662	0.2
1.849	3.42653	0.19
1.85	3.39645	0.18
1.851	3.39637	0.173333
1.852	3.39628	0.166667
1.853	3.3962	0.16
1.854	3.40612	0.165
1.855	3.41604	0.17
1.856	3.43595	0.176667
1.857	3.45587	0.183333
1.858	3.47579	0.19
1.859	3.4907	0.17
1.86	3.50562	0.15
1.861	3.61887	0.19
1.862	3.73212	0.23
1.863	3.84537	0.27
1.864	3.77529	0.23
1.865	3.70521	0.19
1.866	3.67512	0.2
1.867	3.64504	0.21
1.868	3.61496	0.22
1.869	3.68987	0.235
1.87	3.76479	0.25
1.871	3.71137	0.313333
1.872	3.65796	0.376667
1.873	3.60454	0.44
1.874	3.68946	0.355
1.875	3.77438	0.27
1.876	3.71429	0.253333
1.877	3.65421	0.236667
1.878	3.59413	0.22
1.879	3.61404	0.185
1.88	3.63396	0.15
1.881	3.58388	0.14
1.882	3.53379	0.13
1.883	3.48371	0.12
1.884	3.41363	0.095
1.885	3.34355	0.07
1.886	3.30013	0.143333
1.887	3.25671	0.216667
1.888	3.2133	0.29
1.889	3.27821	0.235
1.89	3.34313	0.18
1.891	3.33305	0.173333
1.892	3.32296	0.166667
1.893	3.31288	0.16
1.894	3.4128	0.135
1.895	3.51272	0.11
1.896	3.51597	0.133333
1.897	3.51922	0.156667
1.898	3.52247	0.18
1.899	3.64738	0.19
1.9	3.7723	0.2
1.901	3.80222	0.213333
1.902	3.83213	0.226667
1.903	3.86205	0.24
1.904	3.85697	0.23
1.905	3.85189	0.22
1.906	3.8718	0.176667
1.907	3.89172	0.133333
1.908	3.91164	0.09
1.909	3.82155	0.115
1.91	3.73147	0.14
1.911	3.71139	0.146667
1.912	3.6913	0.153333
1.913	3.67122	0.16
1.914	3.61114	0.14
1.915	3.55106	0.12
1.916	3.55431	0.106667
1.917	3.55756	0.0933333
1.918	3.56081	0.08
1.919	3.55072	0.075
1.92	3.54064	0.07
1.921	3.51389	0.0666667
1.922	3.48714	0.0633333
1.923	3.46039	0.06
1.924	3.48031	0.085
1.925	3.50023	0.11
1.926	3.44681	0.106667
1.927	3.39339	0.103333
1.928	3.33998	0.1
1.929	3.32989	0.095
1.93	3.31981	0.09
1.931	3.31639	0.11
1.932	3.31298	0.13
1.933	3.30956	0.15
1.934	3.26448	0.165
1.935	3.2194	0.18
1.936	3.25598	0.17
1.937	3.29256	0.16
1.938	3.32915	0.15
1.939	3.37906	0.175
1.94	3.42898	0.2
1.941	3.5389	0.196667
1.942	3.64881	0.193333
1.943	3.75873	0.19
1.944	3.82365	0.235
1.945	3.88857	0.28
1.946	3.92515	0.23
1.947	3.96173	0.18
1.948	3.99832	0.13
1.949	3.91323	0.175
1.95	3.82815	0.22
1.951	3.80807	0.193333
1.952	3.78798	0.166667
1.953	3.7679	0.14
1.954	3.71782	0.145
1.955	3.66774	0.15
1.956	3.64765	0.16
1.957	3.62757	0.17
1.958	3.60749	0.18
1.959	3.6124	0.2
1.96	3.61732	0.22
1.961	3.6139	0.2
1.962	3.61049	0.18
1.963	3.60707	0.16
1.964	3.60199	0.15
1.965	3.59691	0.14
1.966	3.56349	0.17
1.967	3.53007	0.2
1.968	3.49666	0.23
1.969	3.47657	0.245
1.97	3.45649	0.26
1.971	3.38641	0.2
1.972	3.31632	0.14
1.973	3.24624	0.08
1.974	3.28616	0.15
1.975	3.32608	0.22
1.976	3.30266	0.23
1.977	3.27924	0.24
1.978	3.25583	0.25
1.979	3.17074	0.23
1.98	3.08566	0.21
1.981	3.12558	0.196667
1.982	3.16549	0.183333
1.983	3.20541	0.17
1.984	3.23533	0.145
1.985	3.26525	0.12
1.986	3.2685	0.116667
1.987	3.27175	0.113333
1.988	3.275	0.11
1.989	3.24991	0.165
1.99	3.22483	0.22
1.991	3.27808	0.19
1.992	3.33133	0.16
1.993	3.38458	0.13
1.994	3.3995	0.105
1.995	3.41442	0.08
1.996	3.491	0.11
1.997	3.56758	0.14
1.998	3.64417	0.17
[truncated: 3,002 more rows]

## Sheet: d18Osw
Age (Ma)	d18Osw (per mil)	d18Osw (per mil) 1 sigma
0	0	0.281347
0.001	-0.0561633	0.316238
0.002	0.0227857	0.297867
0.003	-0.0285092	0.287413
0.004	0.0169517	0.283373
0.005	0.0796648	0.310644
0.006	0.0647773	0.294629
0.007	0.150742	0.285351
0.008	0.222364	0.330303
0.009	0.271859	0.307744
0.01	0.303161	0.315367
0.011	0.47723	0.327195
0.012	0.396522	0.352598
0.013	0.515361	0.388788
0.014	0.509847	0.309768
0.015	0.658754	0.397649
0.016	0.770055	0.333251
0.017	0.779108	0.404382
0.018	0.853006	0.367423
0.019	0.977682	0.297363
0.02	0.942314	0.295053
0.021	0.96349	0.284704
0.022	0.923546	0.290011
0.023	0.914697	0.282179
0.024	0.832726	0.295053
0.025	0.840882	0.28019
0.026	0.79673	0.275908
0.027	0.740987	0.296574
0.028	0.825055	0.273176
0.029	0.704107	0.338378
0.03	0.750908	0.267032
0.031	0.702345	0.284825
0.032	0.713744	0.279117
0.033	0.760385	0.28019
0.034	0.695348	0.274818
0.035	0.694496	0.267687
0.036	0.629833	0.271339
0.037	0.595366	0.279117
0.038	0.459176	0.352145
0.039	0.533911	0.274146
0.04	0.533352	0.268712
0.041	0.476918	0.313847
0.042	0.520113	0.268188
0.043	0.549476	0.286629
0.044	0.56852	0.27037
0.045	0.59017	0.28271
0.046	0.461348	0.319687
0.047	0.456867	0.307287
0.048	0.527534	0.28271
0.049	0.626489	0.267208
0.05	0.505742	0.268188
0.051	0.615746	0.262916
0.052	0.543796	0.265377
0.053	0.503225	0.268712
0.054	0.535632	0.297658
0.055	0.339283	0.272397
0.056	0.482431	0.278613
0.057	0.449172	0.288097
0.058	0.359722	0.297658
0.059	0.378644	0.297164
0.06	0.42717	0.279643
0.061	0.467434	0.273542
0.062	0.336396	0.319228
0.063	0.335994	0.292243
0.064	0.389249	0.334449
0.065	0.557315	0.28932
0.066	0.447033	0.31273
0.067	0.603033	0.300427
0.068	0.542422	0.30385
0.069	0.534122	0.380132
0.07	0.549916	0.359479
0.071	0.666687	0.304959
0.072	0.64901	0.27542
0.073	0.718971	0.280758
0.074	0.590432	0.28019
0.075	0.530634	0.298172
0.076	0.567209	0.276993
0.077	0.558764	0.275329
0.078	0.567237	0.298172
0.079	0.567631	0.302335
0.08	0.540845	0.292243
0.081	0.419404	0.278613
0.082	0.483671	0.319228
0.083	0.522928	0.351292
0.084	0.479373	0.380953
0.085	0.530755	0.435381
0.086	0.588264	0.395885
0.087	0.534265	0.366955
0.088	0.57333	0.352598
0.089	0.666951	0.321179
0.09	0.638021	0.294958
0.091	0.568558	0.281347
0.092	0.542711	0.290345
0.093	0.587305	0.293811
0.094	0.348852	0.299833
0.095	0.53773	0.268887
0.096	0.466527	0.281957
0.097	0.475958	0.27369
0.098	0.370445	0.284825
0.099	0.373238	0.346843
0.1	0.435233	0.27542
0.101	0.537644	0.290957
0.102	0.620352	0.286629
0.103	0.472211	0.268887
0.104	0.56768	0.284264
0.105	0.477125	0.320166
0.106	0.425213	0.339789
0.107	0.4602	0.332904
0.108	0.331396	0.419076
0.109	0.513134	0.332425
0.11	0.531136	0.380534
0.111	0.571762	0.310322
0.112	0.495704	0.314335
0.113	0.558121	0.271662
0.114	0.480538	0.276089
0.115	0.220455	0.348999
0.116	0.175372	0.285318
0.117	0.255289	0.304959
0.118	0.325206	0.359939
0.119	0.0101235	0.276993
0.12	0.0100405	0.278613
0.121	0.0499575	0.302335
0.122	0.0348745	0.274818
0.123	-0.0402085	0.287587
0.124	0.194708	0.402376
0.125	-0.0253745	0.297658
0.126	0.0345425	0.287272
0.127	0.214459	0.3121
0.128	0.394376	0.470983
0.129	0.424293	0.492646
0.13	0.52921	0.476714
0.131	0.422413	0.524887
0.132	0.767334	0.41821
0.133	0.64305	0.419434
0.134	0.840254	0.381314
0.135	1.05174	0.310896
0.136	0.959317	0.429076
0.137	1.09629	0.287272
0.138	1.10892	0.267126
0.139	1.06877	0.293811
0.14	1.0166	0.367423
0.141	1.05638	0.286007
0.142	0.95772	0.32597
0.143	1.04701	0.298172
0.144	0.963135	0.285701
0.145	0.881251	0.304395
0.146	0.945946	0.296184
0.147	0.883674	0.302995
0.148	0.834979	0.310322
0.149	0.781551	0.321179
0.15	0.796844	0.27369
0.151	0.865764	0.272993
0.152	0.824946	0.281347
0.153	0.693928	0.356826
0.154	0.719419	0.29313
0.155	0.459739	0.395103
0.156	0.743736	0.280011
0.157	0.736558	0.27915
0.158	0.642737	0.311649
0.159	0.681692	0.33738
0.16	0.856411	0.297489
0.161	0.908815	0.272993
0.162	0.827284	0.278848
0.163	0.783683	0.272958
0.164	0.758267	0.267032
0.165	0.688664	0.268887
0.166	0.634677	0.278971
0.167	0.631953	0.28019
0.168	0.603579	0.297489
0.169	0.600879	0.360416
0.17	0.637361	0.269258
0.171	0.675336	0.268712
0.172	0.610831	0.272316
0.173	0.595794	0.27542
0.174	0.651251	0.3121
0.175	0.430817	0.345624
0.176	0.586482	0.313209
0.177	0.636847	0.362112
0.178	0.560794	0.288368
0.179	0.6184	0.292243
0.18	0.653906	0.269548
0.181	0.657336	0.276089
0.182	0.574749	0.287934
0.183	0.489069	0.316475
0.184	0.721293	0.36091
0.185	0.782059	0.286629
0.186	0.747908	0.286629
0.187	0.754184	0.27759
0.188	0.767677	0.268247
0.189	0.688307	0.276417
0.19	0.593647	0.320663
0.191	0.524025	0.3262
0.192	0.394598	0.381838
0.193	0.531207	0.292243
0.194	0.377467	0.283912
0.195	0.303835	0.355114
0.196	0.334367	0.306767
0.197	0.252583	0.276089
0.198	0.406252	0.278848
0.199	0.185978	0.281957
0.2	0.132957	0.353067
0.201	0.0614759	0.280758
0.202	0.0972101	0.280758
0.203	0.196755	0.314335
0.204	0.294448	0.373664
0.205	0.302136	0.314335
0.206	0.282657	0.388362
0.207	0.344805	0.293268
0.208	0.379952	0.280758
0.209	0.296333	0.290957
0.21	0.20267	0.3121
0.211	0.205478	0.306767
0.212	0.384095	0.399132
0.213	0.248354	0.291548
0.214	0.164914	0.273964
0.215	0.143731	0.270012
0.216	0.275085	0.330615
0.217	0.132578	0.392205
0.218	0.220278	0.317657
0.219	0.292465	0.413408
0.22	0.274104	0.355114
0.221	0.520788	0.283912
0.222	0.828941	0.317657
0.223	0.76588	0.317657
0.224	0.723717	0.292243
0.225	0.672495	0.272993
0.226	0.506355	0.29159
0.227	0.490578	0.348434
0.228	0.677992	0.293609
0.229	0.295027	0.453652
0.23	0.623506	0.292243
0.231	0.560253	0.335
0.232	0.498989	0.28932
0.233	0.253639	0.343083
0.234	0.315327	0.282356
0.235	0.0953929	0.285318
0.236	0.092114	0.282356
0.237	0.00557458	0.273964
0.238	-0.0523627	0.27732
0.239	-0.0547332	0.287228
0.24	0.1985	0.365453
0.241	0.182805	0.371753
0.242	0.0468612	0.393899
0.243	0.182731	0.439431
0.244	0.45063	0.415933
0.245	0.740974	0.289925
0.246	0.743581	0.320936
0.247	0.605346	0.318914
0.248	0.616655	0.324037
0.249	0.619317	0.296827
0.25	0.66368	0.296184
0.251	0.744734	0.284605
0.252	0.810966	0.270936
0.253	0.621554	0.313379
0.254	0.724627	0.275908
0.255	0.491557	0.330615
0.256	0.673465	0.283901
0.257	0.687863	0.285318
0.258	0.673648	0.277489
0.259	0.643764	0.28019
0.26	0.61695	0.278848
0.261	0.599225	0.265059
0.262	0.536679	0.275908
0.263	0.580867	0.324663
0.264	0.50483	0.320936
0.265	0.612715	0.290043
0.266	0.583329	0.291548
0.267	0.556023	0.283119
0.268	0.299619	0.408847
0.269	0.502052	0.291548
0.27	0.622947	0.272075
0.271	0.623132	0.277714
0.272	0.466955	0.347707
0.273	0.223484	0.411856
0.274	0.502583	0.289007
0.275	0.505905	0.280891
0.276	0.328402	0.346996
0.277	0.519532	0.280011
0.278	0.522253	0.322374
0.279	0.436314	0.282179
0.28	0.314501	0.301869
0.281	0.289342	0.275602
0.282	0.257043	0.281347
0.283	0.24261	0.277489
0.284	0.22968	0.286367
0.285	0.194115	0.27915
0.286	0.194286	0.283901
0.287	0.206417	0.30587
0.288	0.199398	0.31957
0.289	0.376736	0.300333
0.29	0.452198	0.303686
0.291	0.436474	0.288617
0.292	0.481328	0.384326
0.293	0.525768	0.294321
0.294	0.486699	0.307409
0.295	0.547352	0.276688
0.296	0.468119	0.380666
0.297	0.498515	0.285318
0.298	0.389318	0.298172
0.299	0.460157	0.290786
0.3	0.399388	0.283901
0.301	0.38248	0.288368
0.302	0.281268	0.284704
0.303	0.237882	0.279743
0.304	0.239679	0.350179
0.305	0.302529	0.293609
0.306	0.398099	0.34432
0.307	0.315988	0.350179
0.308	0.353098	0.298873
0.309	0.345593	0.286804
0.31	0.278816	0.287576
0.311	0.259969	0.276688
0.312	0.164391	0.27369
0.313	0.151483	0.283901
0.314	0.199116	0.347886
0.315	0.0660139	0.295561
0.316	0.205078	0.315911
0.317	0.210157	0.420305
0.318	0.129337	0.305543
0.319	0.0734615	0.270936
0.32	0.278457	0.356826
0.321	0.122347	0.292916
0.322	0.0996344	0.287272
0.323	0.0213538	0.286629
0.324	-0.102311	0.335
0.325	-0.0506374	0.280891
0.326	-0.0671431	0.287576
0.327	-0.0902125	0.303686
0.328	-0.0885224	0.305123
0.329	-0.102025	0.280535
0.33	0.0753234	0.331248
0.331	0.00411235	0.309445
0.332	0.552804	0.592874
0.333	-0.0926649	0.393319
0.334	0.0226739	0.366751
0.335	0.310289	0.380666
0.336	0.431399	0.432579
0.337	0.37242	0.396366
0.338	0.469522	0.405709
0.339	0.475002	0.427734
0.34	0.759777	0.331521
0.341	1.03744	0.345335
0.342	0.733574	0.386272
0.343	0.88482	0.336155
0.344	0.904109	0.333551
0.345	0.744374	0.357071
0.346	0.786067	0.316544
0.347	0.713791	0.313209
0.348	0.58034	0.386005
0.349	0.825946	0.268747
0.35	0.72483	0.277489
0.351	0.67087	0.271581
0.352	0.582111	0.283119
0.353	0.656654	0.284704
0.354	0.598719	0.373639
0.355	0.549922	0.280011
0.356	0.550944	0.300707
0.357	0.473441	0.287228
0.358	0.523749	0.311649
0.359	0.370517	0.38543
0.36	0.546179	0.287576
0.361	0.518081	0.282356
0.362	0.475761	0.282179
0.363	0.396782	0.30587
0.364	0.486564	0.286367
0.365	0.422371	0.284704
0.366	0.407592	0.292329
0.367	0.508973	0.277489
0.368	0.297232	0.372995
0.369	0.417619	0.274089
0.37	0.337696	0.30587
0.371	0.374355	0.268701
0.372	0.370305	0.270012
0.373	0.233558	0.27831
0.374	0.239635	0.273233
0.375	0.210955	0.271213
0.376	0.294411	0.320936
0.377	0.321137	0.327347
0.378	0.218722	0.331898
0.379	0.353663	0.273176
0.38	0.388578	0.27822
0.381	0.467291	0.269258
0.382	0.32759	0.28019
0.383	0.404507	0.269258
0.384	0.383657	0.275148
0.385	0.245718	0.28303
0.386	0.196036	0.368112
0.387	0.26275	0.300427
0.388	0.417145	0.272408
0.389	0.290585	0.274408
0.39	0.206094	0.275148
0.391	0.255197	0.284704
0.392	0.234506	0.317657
0.393	0.23177	0.30587
0.394	0.234001	0.295053
0.395	0.163071	0.325308
0.396	0.256466	0.378228
0.397	-0.0249727	0.292329
0.398	0.0974065	0.310896
0.399	-0.0680016	0.301092
0.4	-0.0299378	0.282179
0.401	-0.0591764	0.285526
0.402	-0.0966037	0.295645
0.403	-0.0248216	0.302159
0.404	0.0323191	0.298998
0.405	-0.0608437	0.292617
0.406	-0.0738191	0.284704
0.407	-0.064413	0.299593
0.408	0.15948	0.31957
0.409	-0.0219897	0.28303
0.41	-0.0540172	0.276688
0.411	0.0673317	0.278971
0.412	0.00651421	0.283901
0.413	0.0728497	0.274966
0.414	0.166527	0.280535
0.415	0.202723	0.313209
0.416	0.299466	0.287228
0.417	0.221436	0.273861
0.418	0.206021	0.331898
0.419	0.265544	0.277669
0.42	0.192085	0.314335
0.421	0.326222	0.463708
0.422	0.216487	0.336155
0.423	0.0908665	0.341906
0.424	-0.0141976	0.425625
0.425	0.367836	0.403555
0.426	0.694621	0.346491
0.427	-0.000716466	0.358408
0.428	0.563195	0.384261
0.429	0.910364	0.35659
0.43	0.963595	0.298329
0.431	1.08451	0.306268
0.432	1.09442	0.321102
0.433	0.935079	0.315278
0.434	1.0909	0.330606
0.435	1.02822	0.301175
0.436	0.963633	0.301175
0.437	0.826972	0.28271
0.438	0.853065	0.287576
0.439	0.941825	0.297416
0.44	0.784861	0.375666
0.441	0.854676	0.28271
0.442	0.856505	0.286629
0.443	0.816946	0.28271
0.444	0.662074	0.300707
0.445	0.60814	0.297416
0.446	0.67381	0.283648
0.447	0.447571	0.4125
0.448	0.622685	0.287576
0.449	0.612761	0.287576
0.45	0.624978	0.308747
0.451	0.492459	0.307825
0.452	0.533762	0.317421
0.453	0.434998	0.29926
0.454	0.526172	0.358643
0.455	0.370298	0.288108
0.456	0.304798	0.296522
0.457	0.47686	0.354833
0.458	0.437551	0.29313
0.459	0.348591	0.333954
0.46	0.392634	0.298998
0.461	0.36103	0.298329
0.462	0.249225	0.300707
0.463	0.354579	0.295645
0.464	0.162897	0.426505
0.465	0.321382	0.279117
0.466	0.300679	0.273141
0.467	0.32623	0.281791
0.468	0.293359	0.332716
0.469	0.309439	0.318316
0.47	0.21217	0.327958
0.471	0.138524	0.348721
0.472	0.241916	0.33527
0.473	0.200286	0.398372
0.474	0.309266	0.343739
0.475	0.402508	0.274784
0.476	0.432338	0.280045
0.477	0.337545	0.280992
0.478	0.449332	0.281957
0.479	0.384591	0.345335
0.48	0.318231	0.356309
0.481	0.326435	0.286629
0.482	0.279263	0.276688
0.483	0.270086	0.280635
0.484	0.136782	0.276688
0.485	0.267792	0.331898
0.486	0.212854	0.294449
0.487	0.126916	0.290861
0.488	0.0465756	0.298329
0.489	0.0266734	0.281957
0.49	0.0682759	0.306033
0.491	0.0459242	0.326276
0.492	0.0166738	0.300707
0.493	-0.0164407	0.295645
0.494	0.199126	0.533971
0.495	0.0755749	0.279117
0.496	-0.0160964	0.309879
0.497	0.0755962	0.280011
0.498	0.380267	0.415933
0.499	0.183282	0.279743
0.5	0.177635	0.271581
0.501	0.237611	0.278945
0.502	0.196773	0.268693
0.503	0.157115	0.272333
0.504	0.18238	0.278122
0.505	0.175969	0.282229
0.506	0.176794	0.33242
0.507	0.235499	0.288161
0.508	0.149209	0.317419
0.509	0.233946	0.277358
0.51	0.288436	0.288105
0.511	0.411117	0.285095
0.512	0.505305	0.392186
0.513	0.461618	0.280089
0.514	0.411641	0.300537
0.515	0.463133	0.282969
0.516	0.412485	0.311857
0.517	0.364908	0.2956
0.518	0.351071	0.283113
0.519	0.251425	0.289632
0.52	0.263491	0.279749
0.521	0.19932	0.292801
0.522	0.199931	0.339337
0.523	0.179771	0.27861
0.524	-0.0463415	0.378486
0.525	0.0501154	0.360907
0.526	0.111166	0.297544
0.527	0.235028	0.287733
0.528	0.14218	0.291319
0.529	0.181236	0.286587
0.53	0.151648	0.28323
0.531	0.114631	0.452236
0.532	0.255381	0.285357
0.533	0.191167	0.314493
0.534	0.266794	0.29697
0.535	0.420789	0.325834
0.536	0.585536	0.301072
0.537	0.276757	0.435703
0.538	0.636825	0.298562
0.539	0.495073	0.340292
0.54	0.448987	0.379381
0.541	0.623091	0.346988
0.542	0.32646	0.394005
0.543	0.62565	0.314235
0.544	0.436038	0.386154
0.545	0.558929	0.332658
0.546	0.622441	0.356256
0.547	0.590088	0.288089
0.548	0.591495	0.290847
0.549	0.568302	0.29895
0.55	0.619236	0.289969
0.551	0.480075	0.317588
0.552	0.651252	0.281324
0.553	0.517122	0.314759
0.554	0.528407	0.277447
0.555	0.470623	0.267845
0.556	0.465029	0.271523
0.557	0.483371	0.304317
0.558	0.516374	0.32525
0.559	0.425649	0.269962
0.56	0.437089	0.320094
0.561	0.39039	0.273024
0.562	0.320889	0.289874
0.563	0.468435	0.34946
0.564	0.349708	0.285145
0.565	0.243317	0.281413
0.566	0.167881	0.285095
0.567	0.330631	0.277965
0.568	0.356792	0.277265
0.569	0.573603	0.323264
0.57	0.281831	0.287727
0.571	0.236816	0.297838
0.572	0.0257127	0.299113
0.573	0.106091	0.308954
0.574	0.0686153	0.30387
0.575	-0.0646277	0.271939
0.576	0.0273648	0.280479
0.577	-0.0750107	0.268139
0.578	-0.0382769	0.277023
0.579	-0.119764	0.292453
0.58	0.201664	0.513169
0.581	0.198512	0.316659
0.582	0.366409	0.409211
0.583	0.673034	0.380356
0.584	0.584243	0.400595
0.585	0.850765	0.292739
0.586	0.631401	0.328345
0.587	0.425288	0.360185
0.588	0.514878	0.286552
0.589	0.549086	0.31779
0.59	0.670281	0.341497
0.591	0.349088	0.334737
0.592	0.510362	0.331636
0.593	0.459389	0.307419
0.594	0.413661	0.310336
0.595	0.392033	0.289668
0.596	0.419588	0.302687
0.597	0.39912	0.328709
0.598	0.320977	0.369228
0.599	0.598551	0.323752
0.6	0.538254	0.299667
0.601	0.516053	0.301362
0.602	0.447385	0.30315
0.603	0.414478	0.373643
0.604	0.365851	0.463176
0.605	0.394188	0.361297
0.606	0.420031	0.287389
0.607	0.389484	0.299467
0.608	0.331216	0.313976
0.609	0.197892	0.298772
0.61	0.0834257	0.286583
0.611	0.0112301	0.29264
0.612	-0.057705	0.299326
0.613	0.0211719	0.304104
0.614	0.0859473	0.310399
0.615	0.0595074	0.30848
0.616	0.0130711	0.311786
0.617	0.170142	0.353932
0.618	0.365001	0.409377
0.619	0.391384	0.350024
0.62	0.422449	0.303152
0.621	0.44279	0.322168
0.622	0.445414	0.341753
0.623	0.545063	0.433903
0.624	0.631657	0.541801
0.625	0.815025	0.450694
0.626	1.02195	0.370048
0.627	1.0663	0.375599
0.628	1.10234	0.384397
0.629	1.1381	0.342818
0.63	1.1859	0.308237
0.631	1.07231	0.340202
0.632	0.973943	0.380153
0.633	0.952327	0.379588
0.634	0.917686	0.380098
0.635	0.986829	0.3176
0.636	1.05634	0.278759
0.637	0.982638	0.295267
0.638	0.959015	0.31884
0.639	0.972	0.311769
0.64	0.996477	0.306033
0.641	0.943256	0.330447
0.642	0.88518	0.35891
0.643	0.91423	0.31527
0.644	0.919968	0.288689
0.645	0.915408	0.29488
0.646	0.808739	0.309034
0.647	0.849497	0.324619
0.648	0.897591	0.340881
0.649	0.873895	0.353522
0.65	0.835789	0.366817
0.651	0.856526	0.365143
0.652	0.805943	0.366198
0.653	0.812346	0.33953
0.654	0.804259	0.315707
0.655	0.7274	0.313012
0.656	0.673209	0.310997
0.657	0.731225	0.293189
0.658	0.764349	0.280029
0.659	0.706242	0.306522
0.66	0.653229	0.344499
0.661	0.67451	0.32099
0.662	0.696316	0.300994
0.663	0.611814	0.336158
0.664	0.545252	0.378783
0.665	0.5875	0.341192
0.666	0.635542	0.310061
0.667	0.636647	0.345951
0.668	0.657691	0.388957
0.669	0.597304	0.35404
0.67	0.562869	0.323759
0.671	0.587188	0.323723
0.672	0.614252	0.323686
0.673	0.516808	0.32154
0.674	0.471149	0.317521
0.675	0.539441	0.304181
0.676	0.56538	0.293052
0.677	0.563047	0.29725
0.678	0.54296	0.301722
0.679	0.483876	0.307093
0.68	0.4115	0.312063
0.681	0.3847	0.310135
0.682	0.367272	0.306982
0.683	0.338558	0.316587
0.684	0.252243	0.327728
0.685	0.303375	0.336615
0.686	0.379231	0.347047
0.687	0.362853	0.312606
0.688	0.346729	0.287364
0.689	0.417918	0.291932
0.69	0.368193	0.295531
0.691	0.233944	0.294585
0.692	0.135467	0.292462
0.693	0.262005	0.329249
0.694	0.200466	0.385476
0.695	0.111522	0.321481
0.696	0.0154803	0.280659
0.697	0.0158069	0.289518
0.698	0.0467774	0.30423
0.699	0.0631498	0.310086
0.7	0.0758231	0.317811
0.701	0.170771	0.360659
0.702	0.277358	0.410068
0.703	0.205729	0.355741
0.704	0.203838	0.306796
0.705	0.291554	0.294081
0.706	0.352195	0.28187
0.707	0.40855	0.276282
0.708	0.431875	0.273219
0.709	0.431003	0.289827
0.71	0.420698	0.312194
0.711	0.442143	0.333847
0.712	0.4198	0.35904
0.713	0.397158	0.389582
0.714	0.373274	0.425054
0.715	0.350263	0.383404
0.716	0.459918	0.345006
0.717	0.573223	0.36781
0.718	0.692659	0.392861
0.719	0.651788	0.360894
0.72	0.625316	0.330954
0.721	0.673161	0.343384
0.722	0.715917	0.356504
0.723	0.712804	0.356478
0.724	0.692594	0.356912
0.725	0.604511	0.304305
0.726	0.489169	0.272071
0.727	0.402626	0.280802
0.728	0.328269	0.292373
0.729	0.256413	0.308942
0.73	0.189844	0.328996
0.731	0.213077	0.349807
0.732	0.214507	0.373251
0.733	0.238437	0.330146
0.734	0.293818	0.296993
0.735	0.314202	0.316515
0.736	0.355823	0.339646
0.737	0.410244	0.313785
0.738	0.454321	0.291404
0.739	0.426191	0.348024
0.74	0.385475	0.42313
0.741	0.376883	0.360754
0.742	0.368628	0.309352
0.743	0.555716	0.381284
0.744	0.731095	0.471337
0.745	0.718142	0.407601
0.746	0.684184	0.349684
0.747	0.648585	0.329775
0.748	0.647152	0.311088
0.749	0.667281	0.302243
0.75	0.678042	0.29395
0.751	0.6575	0.30318
0.752	0.62598	0.313817
0.753	0.578423	0.359545
0.754	0.552215	0.411292
0.755	0.542941	0.341248
0.756	0.584142	0.28572
0.757	0.504729	0.288744
0.758	0.478651	0.292352
0.759	0.392714	0.285568
0.76	0.395598	0.276321
0.761	0.30091	0.28819
0.762	0.207335	0.305854
0.763	0.326899	0.313937
0.764	0.487628	0.321302
0.765	0.354075	0.295808
0.766	0.260215	0.275175
0.767	0.258503	0.293888
0.768	0.260095	0.317502
0.769	0.205479	0.299026
0.77	0.15302	0.283682
0.771	0.0606281	0.278687
0.772	-0.0187472	0.276074
0.773	0.00746685	0.309372
0.774	0.0446956	0.357337
0.775	0.0358048	0.303235
0.776	0.042203	0.269693
0.777	0.110839	0.323053
0.778	0.210795	0.414123
0.779	0.0508156	0.345983
0.78	-0.0172092	0.291745
0.781	0.0201762	0.293078
0.782	0.0436391	0.293727
0.783	0.023818	0.293319
0.784	-0.0238837	0.2922
0.785	-0.056657	0.290549
0.786	-0.0923753	0.290685
0.787	-0.0655926	0.310618
0.788	-0.0411786	0.33417
0.789	0.0610835	0.372615
0.79	0.169249	0.41456
0.791	0.167352	0.35815
0.792	0.211728	0.307781
0.793	0.284939	0.377621
0.794	0.325391	0.465106
0.795	0.381055	0.382367
0.796	0.446334	0.316388
0.797	0.4899	0.312664
0.798	0.589606	0.307143
0.799	0.476471	0.301
0.8	0.430567	0.292577
0.801	0.316062	0.293909
0.802	0.310872	0.288692
0.803	0.280329	0.284649
0.804	0.263365	0.280903
0.805	0.18899	0.298947
0.806	0.152783	0.322747
0.807	0.170319	0.299338
0.808	0.192231	0.280287
0.809	0.117659	0.299279
0.81	0.119198	0.321498
0.811	0.235234	0.333687
0.812	0.293943	0.346948
0.813	0.0699481	0.412436
0.814	-0.13368	0.485838
0.815	-0.0356356	0.412399
0.816	0.0613579	0.346865
0.817	0.0147554	0.319556
0.818	-0.0247486	0.297526
0.819	0.00507492	0.321564
0.82	0.0382377	0.349369
0.821	0.103127	0.380119
0.822	0.179561	0.413496
0.823	0.13558	0.401336
0.824	0.0757408	0.390363
0.825	0.202885	0.38002
0.826	0.333009	0.369651
0.827	0.251504	0.32508
0.828	0.145041	0.290243
0.829	0.174912	0.303373
0.83	0.195635	0.31924
0.831	0.15176	0.304243
0.832	0.0706333	0.289607
0.833	0.108544	0.315913
0.834	0.125512	0.348603
0.835	0.13903	0.325764
0.836	0.174789	0.306072
0.837	0.185544	0.316959
0.838	0.214736	0.328704
0.839	0.195504	0.300082
0.84	0.187845	0.277627
0.841	0.197596	0.323502
0.842	0.223764	0.387691
0.843	0.23508	0.313682
0.844	0.281033	0.266612
0.845	0.217791	0.266224
0.846	0.151394	0.266204
0.847	0.101795	0.277451
0.848	0.0542124	0.292478
0.849	-0.0473716	0.28448
0.85	-0.141071	0.277379
0.851	-0.0779059	0.291086
0.852	0.0741961	0.304881
0.853	0.175675	0.363212
0.854	0.270955	0.43494
0.855	0.23558	0.356224
0.856	0.173193	0.294776
0.857	0.0996821	0.279227
0.858	-0.000928822	0.267937
0.859	-0.0346768	0.280173
0.86	-0.0566589	0.299927
0.861	-0.0566	0.344619
0.862	-0.0777195	0.397345
0.863	-0.220008	0.361063
0.864	-0.364446	0.328762
0.865	-0.252539	0.33253
0.866	-0.0940596	0.334887
0.867	0.121536	0.335216
0.868	0.399869	0.334835
0.869	0.348823	0.360302
0.87	0.331246	0.389678
0.871	0.471233	0.333747
0.872	0.614555	0.290124
0.873	0.587282	0.304373
0.874	0.549539	0.321807
0.875	0.566438	0.320791
0.876	0.561249	0.319846
0.877	0.445466	0.398333
0.878	0.341658	0.492333
0.879	0.405963	0.36682
0.88	0.511623	0.278538
0.881	0.35223	0.325292
0.882	0.287962	0.389709
0.883	0.291382	0.360303
0.884	0.296305	0.33377
0.885	0.296657	0.321211
0.886	0.322449	0.309777
0.887	0.336275	0.304723
0.888	0.283524	0.299219
0.889	0.306196	0.298198
0.89	0.295373	0.297552
0.891	0.277319	0.344856
0.892	0.213038	0.402634
0.893	0.314102	0.322258
0.894	0.418285	0.268407
0.895	0.416852	0.26694
0.896	0.403268	0.265559
0.897	0.303274	0.280482
0.898	0.208557	0.301995
0.899	0.234502	0.301978
0.9	0.235478	0.301689
0.901	0.253673	0.289474
0.902	0.251872	0.278675
0.903	0.267931	0.278956
0.904	0.261862	0.278937
0.905	0.254681	0.276984
0.906	0.254714	0.275108
0.907	0.196143	0.287356
0.908	0.153981	0.301826
0.909	0.175733	0.301809
0.91	0.201934	0.302339
0.911	0.221665	0.289024
0.912	0.191727	0.27821
0.913	0.173795	0.296833
0.914	0.193242	0.319162
0.915	0.124557	0.376003
0.916	0.0389528	0.442361
0.917	0.202352	0.376899
0.918	0.412203	0.32106
0.919	0.436801	0.30962
0.92	0.479956	0.29814
0.921	0.386922	0.292613
0.922	0.308437	0.287941
0.923	0.300575	0.275677
0.924	0.299097	0.266244
0.925	0.258047	0.270869
0.926	0.206355	0.276562
0.927	0.18312	0.286215
0.928	0.184621	0.29826
0.929	0.0647848	0.306056
0.93	-0.0405575	0.31355
0.931	0.0139441	0.304635
0.932	0.0891168	0.296244
0.933	0.167364	0.293727
0.934	0.228572	0.29078
0.935	0.177144	0.281199
0.936	0.126364	0.273012
0.937	0.0192059	0.295006
0.938	-0.0734838	0.3237
0.939	0.0221881	0.284285
0.94	0.0684635	0.260442
0.941	0.0105847	0.276041
0.942	-0.026726	0.301271
0.943	-0.028601	0.289007
0.944	-0.0562932	0.278732
0.945	0.0159343	0.328762
0.946	0.0766465	0.395675
0.947	-0.00321967	0.332899
0.948	-0.105517	0.284793
0.949	-0.118948	0.278777
0.95	-0.118627	0.274116
0.951	-0.156127	0.277866
0.952	-0.20295	0.282268
0.953	-0.123257	0.321658
0.954	-0.0585417	0.374751
0.955	-0.112263	0.34047
0.956	-0.170309	0.310486
0.957	-0.0630931	0.367025
0.958	0.0502877	0.434805
0.959	0.35745	0.443074
0.96	0.647391	0.451615
0.961	0.674373	0.395401
0.962	0.719653	0.345294
0.963	0.779768	0.341963
0.964	0.833188	0.33892
0.965	0.694985	0.342165
0.966	0.571962	0.345452
0.967	0.604616	0.311259
0.968	0.600085	0.282619
0.969	0.500132	0.271224
0.97	0.439014	0.262505
0.971	0.330685	0.273421
0.972	0.236811	0.288248
0.973	0.267213	0.308339
0.974	0.315743	0.332053
0.975	0.248731	0.302895
0.976	0.172819	0.279984
0.977	0.132007	0.286468
0.978	0.0766912	0.29358
0.979	0.0622025	0.314339
0.98	0.0231754	0.338575
0.981	0.0995091	0.306486
0.982	0.16452	0.2807
0.983	0.232923	0.326098
0.984	0.356863	0.383793
0.985	0.422817	0.361894
0.986	0.485772	0.340703
0.987	0.442915	0.315194
0.988	0.424287	0.293592
0.989	0.420526	0.284007
0.99	0.388688	0.276411
0.991	0.316539	0.283026
0.992	0.278916	0.288299
0.993	0.278948	0.310924
0.994	0.310837	0.338507
0.995	0.289088	0.308844
0.996	0.279548	0.284098
0.997	0.272096	0.28871
0.998	0.270733	0.292795
0.999	0.285518	0.297186
1	0.286058	0.302335
1.001	0.362799	0.285616
1.002	0.438075	0.271595
1.003	0.569233	0.287543
1.004	0.727575	0.30385
1.005	0.678605	0.293811
1.006	0.635495	0.284825
1.007	0.598298	0.290915
1.008	0.544952	0.297658
1.009	0.494731	0.313847
1.01	0.442385	0.332192
1.011	0.444038	0.30307
1.012	0.433045	0.279643
1.013	0.372985	0.293004
1.014	0.294069	0.308221
1.015	0.211159	0.355141
1.016	0.111916	0.410307
1.017	0.173873	0.341433
1.018	0.220523	0.287587
1.019	0.274637	0.292243
1.02	0.305887	0.297658
1.021	0.2877	0.297164
1.022	0.271837	0.297164
1.023	0.308506	0.342329
1.024	0.356855	0.395885
1.025	0.383964	0.434815
1.026	0.409642	0.475659
1.027	0.388369	0.36565
1.028	0.349227	0.283464
1.029	0.349401	0.285362
1.03	0.330078	0.28734
1.031	0.41382	0.289396
1.032	0.49515	0.291529
1.033	0.556948	0.293737
1.034	0.625298	0.296237
1.035	0.690501	0.282234
1.036	0.744785	0.270844
1.037	0.787811	0.280382
1.038	0.813016	0.291529
1.039	0.672506	0.340608
1.04	0.566618	0.402026
1.041	0.642893	0.347691
1.042	0.76177	0.301644
1.043	0.766783	0.315832
1.044	0.774381	0.331521
1.045	0.748423	0.32573
1.046	0.701439	0.319924
1.047	0.659905	0.305739
1.048	0.61433	0.292746
1.049	0.6159	0.294671
1.05	0.627803	0.296924
1.051	0.626616	0.30798
1.052	0.611378	0.320166
1.053	0.583288	0.295954
1.054	0.542741	0.277289
1.055	0.585013	0.286141
1.056	0.571975	0.297164
1.057	0.544594	0.319228
1.058	0.500422	0.345183
1.059	0.415621	0.328598
1.06	0.339755	0.313847
1.061	0.334193	0.331964
1.062	0.339569	0.351292
1.063	0.28793	0.406065
1.064	0.245302	0.466652
1.065	0.224411	0.365054
1.066	0.206568	0.287098
1.067	0.136159	0.293963
1.068	0.0618016	0.301424
1.069	0.0826185	0.279913
1.07	0.08953	0.26487
1.071	0.044061	0.282234
1.072	0.00470527	0.307065
1.073	0.0740568	0.321581
1.074	0.132806	0.337528
1.075	0.116564	0.318365
1.076	0.0939665	0.300793
1.077	0.223142	0.360252
1.078	0.37651	0.432596
1.079	0.285618	0.377907
1.08	0.194216	0.329251
1.081	0.382303	0.299844
1.082	0.557867	0.276612
1.083	0.509441	0.295193
1.084	0.45931	0.317962
1.085	0.481919	0.29309
1.086	0.454395	0.273202
1.087	0.478175	0.283108
1.088	0.479146	0.294451
1.089	0.482373	0.287283
1.09	0.469884	0.280936
1.091	0.522713	0.292684
1.092	0.568911	0.306033
1.093	0.495101	0.320595
1.094	0.435046	0.336749
1.095	0.480571	0.303894
1.096	0.538789	0.27813
1.097	0.598736	0.304326
1.098	0.687238	0.337944
1.099	0.626864	0.320663
1.1	0.625969	0.30282
1.101	0.616851	0.30798
1.102	0.588312	0.313847
1.103	0.455494	0.349213
1.104	0.355149	0.389007
1.105	0.344714	0.36343
1.106	0.350146	0.339301
1.107	0.243354	0.317984
1.108	0.158072	0.298706
1.109	0.310375	0.325963
1.11	0.525806	0.357806
1.111	0.453825	0.309861
1.112	0.404226	0.274092
1.113	0.47593	0.301209
1.114	0.558591	0.336749
1.115	0.565541	0.309437
1.116	0.560346	0.286629
1.117	0.609598	0.298371
1.118	0.6703	0.311892
1.119	0.646059	0.333138
1.12	0.637806	0.356899
1.121	0.712486	0.330303
1.122	0.787278	0.306638
1.123	0.767347	0.306638
1.124	0.767502	0.30623
1.125	0.732013	0.295595
1.126	0.709193	0.286182
1.127	0.753671	0.279687
1.128	0.788983	0.273861
1.129	0.708682	0.272308
1.13	0.626948	0.270844
1.131	0.487671	0.304549
1.132	0.323267	0.351499
1.133	0.404971	0.314335
1.134	0.53623	0.283992
1.135	0.535352	0.293004
1.136	0.42774	0.302335
1.137	0.372227	0.316277
1.138	0.292446	0.331521
1.139	0.335456	0.310534
1.14	0.386061	0.292492
1.141	0.37771	0.31698
1.142	0.31951	0.344538
1.143	0.384762	0.313152
1.144	0.437451	0.286861
1.145	0.406921	0.306849
1.146	0.388805	0.330494
1.147	0.40222	0.333319
1.148	0.409073	0.336387
1.149	0.423732	0.292884
1.15	0.423284	0.263486
1.151	0.362827	0.267655
1.152	0.269574	0.274092
1.153	0.259074	0.274818
1.154	0.269228	0.274818
1.155	0.293984	0.307065
1.156	0.32993	0.350509
1.157	0.295719	0.318573
1.158	0.260408	0.290861
1.159	0.327496	0.298583
1.16	0.384644	0.306638
1.161	0.328488	0.309647
1.162	0.284228	0.312292
1.163	0.328879	0.286629
1.164	0.349796	0.267687
1.165	0.289736	0.266235
1.166	0.234685	0.26487
1.167	0.21705	0.280382
1.168	0.195786	0.301644
1.169	0.257676	0.291762
1.17	0.303634	0.28271
1.171	0.334431	0.280624
1.172	0.376885	0.278613
1.173	0.448629	0.271089
1.174	0.52486	0.265121
1.175	0.504316	0.315832
1.176	0.495986	0.394543
1.177	0.425929	0.341012
1.178	0.348292	0.29669
1.179	0.308666	0.337326
1.18	0.267499	0.386638
1.181	0.336562	0.321374
1.182	0.391304	0.273636
1.183	0.479156	0.281139
1.184	0.549405	0.289852
1.185	0.519809	0.302719
1.186	0.478232	0.31704
1.187	0.473604	0.292489
1.188	0.46732	0.273416
1.189	0.543662	0.305842
1.19	0.628656	0.350143
1.191	0.751316	0.305842
1.192	0.905511	0.273202
1.193	0.866134	0.271089
1.194	0.856217	0.267935
1.195	0.881171	0.280145
1.196	0.927989	0.296461
1.197	0.946615	0.293737
1.198	0.931589	0.290861
1.199	0.976537	0.286861
1.2	1.02112	0.28271
1.201	0.872514	0.324846
1.202	0.719297	0.379745
1.203	0.827316	0.316507
1.204	0.947163	0.272675
1.205	0.827525	0.3262
1.206	0.705862	0.403121
1.207	0.811678	0.325963
1.208	0.913535	0.270604
1.209	0.874976	0.271848
1.21	0.808334	0.272993
1.211	0.71839	0.308109
1.212	0.620026	0.356099
1.213	0.65809	0.31704
1.214	0.71927	0.285351
1.215	0.601262	0.304107
1.216	0.496075	0.324637
1.217	0.401777	0.386814
1.218	0.338423	0.458641
1.219	0.444859	0.354727
1.22	0.544335	0.278862
1.221	0.478485	0.298583
1.222	0.426777	0.324037
1.223	0.337856	0.311892
1.224	0.246058	0.300793
1.225	0.203354	0.298164
1.226	0.167634	0.296018
1.227	0.189906	0.293516
1.228	0.189979	0.291078
1.229	0.131162	0.27813
1.23	0.0652106	0.267935
1.231	0.0870186	0.276677
1.232	0.071878	0.286861
1.233	0.0839964	0.28247
1.234	0.0960514	0.278369
1.235	0.115387	0.294194
1.236	0.130726	0.313152
1.237	0.128201	0.30501
1.238	0.106861	0.297164
1.239	0.0798101	0.322684
1.24	0.0629367	0.35171
1.241	0.144938	0.372242
1.242	0.205247	0.394723
1.243	0.234117	0.369021
1.244	0.272572	0.344331
1.245	0.43108	0.31293
1.246	0.584403	0.287839
1.247	0.666006	0.283464
1.248	0.745724	0.278613
1.249	0.725452	0.296237
1.25	0.707751	0.318365
1.251	0.69773	0.340608
1.252	0.67338	0.364863
1.253	0.708866	0.310081
1.254	0.767633	0.271595
1.255	0.66647	0.26998
1.256	0.57648	0.271028
1.257	0.504774	0.288758
1.258	0.449262	0.308973
1.259	0.363632	0.349213
1.26	0.300199	0.395682
1.261	0.337775	0.319345
1.262	0.404982	0.269887
1.263	0.295505	0.289074
1.264	0.209222	0.315367
1.265	0.277704	0.283339
1.266	0.331431	0.2628
1.267	0.303081	0.26954
1.268	0.272085	0.279117
1.269	0.256613	0.287587
1.27	0.26515	0.297408
1.271	0.215563	0.292746
1.272	0.17605	0.288628
1.273	0.20643	0.278548
1.274	0.244235	0.270416
1.275	0.217279	0.276417
1.276	0.202031	0.283464
1.277	0.263245	0.294918
1.278	0.343452	0.307287
1.279	0.298612	0.327948
1.28	0.289738	0.350143
1.281	0.298027	0.382559
1.282	0.293125	0.417979
1.283	0.368354	0.325502
1.284	0.430688	0.267628
1.285	0.516874	0.294374
1.286	0.604092	0.33315
1.287	0.756969	0.303325
1.288	0.880606	0.28019
1.289	0.892022	0.282754
1.29	0.901749	0.285112
1.291	0.853391	0.276702
1.292	0.779854	0.270416
1.293	0.604468	0.292321
1.294	0.430481	0.321988
1.295	0.558956	0.302658
1.296	0.697926	0.286629
1.297	0.621798	0.28364
1.298	0.525976	0.28227
1.299	0.551234	0.286411
1.3	0.576327	0.292
1.301	0.528191	0.304549
1.302	0.48481	0.318573
1.303	0.439295	0.313152
1.304	0.395461	0.307744
1.305	0.332101	0.316507
1.306	0.278892	0.325502
1.307	0.331035	0.299961
1.308	0.384186	0.279643
1.309	0.378026	0.277714
1.31	0.369989	0.275862
1.311	0.347118	0.277987
1.312	0.339584	0.28019
1.313	0.297107	0.320166
1.314	0.271301	0.374107
1.315	0.301727	0.330021
1.316	0.32827	0.293811
1.317	0.340674	0.335375
1.318	0.354678	0.386994
1.319	0.411291	0.368078
1.32	0.449487	0.349967
1.321	0.501545	0.315
1.322	0.555457	0.286403
1.323	0.569113	0.291529
1.324	0.58664	0.29669
1.325	0.611622	0.302335
1.326	0.632017	0.30798
1.327	0.617941	0.331307
1.328	0.58711	0.357616
1.329	0.669296	0.301644
1.33	0.756777	0.264625
1.331	0.74833	0.27037
1.332	0.736965	0.277669
1.333	0.728033	0.312292
1.334	0.714029	0.357616
1.335	0.731014	0.301424
1.336	0.757732	0.265906
1.337	0.688794	0.283464
1.338	0.637528	0.30798
1.339	0.659448	0.338378
1.34	0.684607	0.372628
1.341	0.606496	0.319455
1.342	0.519839	0.279643
1.343	0.402183	0.311006
1.344	0.289941	0.35109
1.345	0.372738	0.354727
1.346	0.420809	0.357616
1.347	0.321507	0.383261
1.348	0.220799	0.410307
1.349	0.240174	0.362321
1.35	0.25477	0.320412
1.351	0.158477	0.320663
1.352	0.0956934	0.319455
1.353	0.100763	0.319005
1.354	0.10856	0.318365
1.355	0.155415	0.291078
1.356	0.169929	0.270844
1.357	0.195983	0.284868
1.358	0.238976	0.302099
1.359	0.331932	0.290132
1.36	0.416954	0.27813
1.361	0.492592	0.304549
1.362	0.564576	0.337326
1.363	0.642667	0.291078
1.364	0.708484	0.26168
1.365	0.711203	0.266317
1.366	0.717912	0.2724
1.367	0.765353	0.267655
1.368	0.833	0.263071
1.369	0.779818	0.292884
1.37	0.704287	0.336387
1.371	0.731471	0.285966
1.372	0.754225	0.25737
1.373	0.686472	0.271627
1.374	0.617324	0.295
1.375	0.588146	0.323303
1.376	0.535158	0.35625
1.377	0.662026	0.30623
1.378	0.803308	0.271089
1.379	0.702016	0.274818
1.38	0.604807	0.278862
1.381	0.513684	0.284868
1.382	0.432593	0.291762
1.383	0.441315	0.285616
1.384	0.424202	0.279377
1.385	0.352854	0.273818
1.386	0.300126	0.269826
1.387	0.261692	0.303325
1.388	0.215113	0.351926
1.389	0.241867	0.319924
1.39	0.28462	0.292492
1.391	0.252455	0.30307
1.392	0.211317	0.314088
1.393	0.323913	0.399288
1.394	0.421641	0.501305
1.395	0.346707	0.41086
1.396	0.298712	0.331964
1.397	0.284044	0.301247
1.398	0.267175	0.278209
1.399	0.289324	0.346593
1.4	0.304883	0.443271
1.401	0.393124	0.422835
1.402	0.481115	0.402929
1.403	0.484733	0.36565
1.404	0.475203	0.33174
1.405	0.488743	0.360765
1.406	0.505832	0.394026
1.407	0.470204	0.37902
1.408	0.454128	0.364317
1.409	0.646693	0.303284
1.41	0.814089	0.264386
1.411	0.863696	0.274571
1.412	0.909933	0.286629
1.413	0.865961	0.286629
1.414	0.851016	0.287839
1.415	0.796704	0.351292
1.416	0.761756	0.43411
1.417	0.686621	0.384027
1.418	0.579932	0.338159
1.419	0.62986	0.292243
1.42	0.69133	0.263181
1.421	0.685248	0.268982
1.422	0.674017	0.276702
1.423	0.603394	0.272397
1.424	0.537368	0.268712
1.425	0.483167	0.272789
1.426	0.420147	0.278369
1.427	0.362983	0.304107
1.428	0.310001	0.337129
1.429	0.283426	0.298583
1.43	0.252386	0.27037
1.431	0.213113	0.273416
1.432	0.165636	0.27723
1.433	0.158704	0.27723
1.434	0.167532	0.276612
1.435	0.157531	0.276612
1.436	0.134978	0.276812
1.437	0.0521261	0.308284
1.438	-0.0394678	0.349464
1.439	0.0325388	0.300398
1.44	0.103656	0.266532
1.441	0.0801004	0.300793
1.442	0.0438421	0.349967
1.443	0.111669	0.300793
1.444	0.177381	0.266977
1.445	0.140684	0.283945
1.446	0.0921207	0.306431
1.447	0.104376	0.333504
1.448	0.110357	0.363973
1.449	0.0973948	0.326958
1.45	0.0700807	0.295392
1.451	0.123422	0.360252
1.452	0.172296	0.440859
1.453	0.4101	0.487187
1.454	0.6767	0.534696
1.455	0.750934	0.417013
1.456	0.864376	0.317768
1.457	0.90051	0.303284
1.458	0.925518	0.290441
1.459	0.852246	0.323303
1.46	0.794893	0.36349
1.461	0.77795	0.34284
1.462	0.765147	0.323847
1.463	0.718284	0.300998
1.464	0.673816	0.282005
1.465	0.558403	0.288931
1.466	0.446911	0.29669
1.467	0.503916	0.310081
1.468	0.562874	0.325279
1.469	0.459168	0.409956
1.47	0.34712	0.50891
1.471	0.408898	0.421285
1.472	0.465889	0.34355
1.473	0.363817	0.320975
1.474	0.261903	0.300998
1.475	0.246331	0.324232
1.476	0.229485	0.349967
1.477	0.239087	0.339678
1.478	0.246975	0.329934
1.479	0.199209	0.30623
1.48	0.143251	0.286182
1.481	0.155837	0.270604
1.482	0.163132	0.2603
1.483	0.184577	0.286403
1.484	0.214048	0.330494
1.485	0.277458	0.333694
1.486	0.333086	0.336749
1.487	0.236966	0.314804
1.488	0.129338	0.295392
1.489	0.171823	0.353078
1.49	0.212475	0.424546
1.491	0.453347	0.371349
1.492	0.692649	0.324037
1.493	0.750147	0.324037
1.494	0.806335	0.324037
1.495	0.93989	0.298583
1.496	1.07396	0.278369
1.497	0.976867	0.316052
1.498	0.898398	0.365054
1.499	0.930366	0.341012
1.5	0.97353	0.319005
1.501	0.930375	0.325279
1.502	0.885922	0.331307
1.503	0.834751	0.337734
1.504	0.717634	0.394367
1.505	0.600212	0.458176
1.506	0.664189	0.376741
1.507	0.731395	0.309143
1.508	0.793557	0.265377
1.509	0.729436	0.26998
1.51	0.667476	0.274329
1.511	0.624943	0.28178
1.512	0.594888	0.290649
1.513	0.558513	0.300998
1.514	0.541357	0.303686
1.515	0.51988	0.306431
1.516	0.471163	0.302992
1.517	0.419268	0.299668
1.518	0.378847	0.296237
1.519	0.336212	0.29669
1.52	0.288337	0.29669
1.521	0.343051	0.287587
1.522	0.374592	0.278862
1.523	0.426842	0.271595
1.524	0.482241	0.292
1.525	0.52637	0.319687
1.526	0.552268	0.295992
1.527	0.576367	0.277088
1.528	0.614704	0.263726
1.529	0.657311	0.313847
1.53	0.730576	0.395482
1.531	0.769995	0.349661
1.532	0.827648	0.309832
1.533	0.87544	0.278613
1.534	0.942422	0.324432
1.535	1.01767	0.386135
1.536	0.97383	0.381153
1.537	0.911954	0.376392
1.538	0.869803	0.371349
1.539	0.919591	0.340037
1.54	0.969676	0.312292
1.541	0.912015	0.29248
1.542	0.862891	0.276829
1.543	0.81034	0.265377
1.544	0.719201	0.281125
1.545	0.637123	0.30307
1.546	0.607397	0.294612
1.547	0.56521	0.286609
1.548	0.53081	0.28019
1.549	0.445873	0.32573
1.55	0.366989	0.387177
1.551	0.437773	0.356084
1.552	0.467112	0.327561
1.553	0.492451	0.303325
1.554	0.469085	0.322229
1.555	0.447898	0.344331
1.556	0.443496	0.335365
1.557	0.451431	0.326701
1.558	0.480783	0.317962
1.559	0.471097	0.297962
1.56	0.449653	0.281347
1.561	0.422622	0.281347
1.562	0.392071	0.281347
1.563	0.363883	0.281347
1.564	0.357968	0.283945
1.565	0.33538	0.286629
1.566	0.366653	0.307287
1.567	0.383902	0.331097
1.568	0.398785	0.357806
1.569	0.469442	0.327741
1.57	0.528277	0.301424
1.571	0.613596	0.29669
1.572	0.686328	0.291301
1.573	0.770363	0.286861
1.574	0.855112	0.284396
1.575	0.941455	0.28247
1.576	0.943176	0.283668
1.577	0.933423	0.285604
1.578	0.889422	0.287098
1.579	0.792867	0.28734
1.58	0.697766	0.287587
1.581	0.684593	0.327561
1.582	0.664933	0.376921
1.583	0.654679	0.433618
1.584	0.605004	0.354527
1.585	0.552507	0.292
1.586	0.527624	0.289109
1.587	0.499555	0.286609
1.588	0.469286	0.283992
1.589	0.452201	0.297658
1.59	0.426569	0.313847
1.591	0.459049	0.328254
1.592	0.518109	0.342534
1.593	0.588062	0.357806
1.594	0.524309	0.322919
1.595	0.444443	0.292746
1.596	0.417771	0.279643
1.597	0.394584	0.269826
1.598	0.377443	0.262205
1.599	0.336057	0.270243
1.6	0.290901	0.283207
1.601	0.268469	0.306395
1.602	0.247604	0.334541
1.603	0.227164	0.366504
1.604	0.243889	0.345868
1.605	0.268245	0.326939
1.606	0.306121	0.328254
1.607	0.347469	0.32964
1.608	0.389291	0.331097
1.609	0.461905	0.337326
1.61	0.533301	0.343739
1.611	0.572983	0.308293
1.612	0.611339	0.279942
1.613	0.643282	0.261226
1.614	0.616977	0.271411
1.615	0.587687	0.285756
1.616	0.5987	0.304001
1.617	0.608523	0.325731
1.618	0.616433	0.349967
1.619	0.511963	0.306033
1.62	0.412149	0.272592
1.621	0.381279	0.273202
1.622	0.356515	0.273202
1.623	0.330933	0.273636
1.624	0.359827	0.277447
1.625	0.389403	0.281347
1.626	0.463491	0.315786
1.627	0.550231	0.359241
1.628	0.634772	0.408995
1.629	0.494289	0.378519
1.63	0.351712	0.349967
1.631	0.323375	0.336749
1.632	0.292957	0.324037
1.633	0.259496	0.312292
1.634	0.314781	0.379195
1.635	0.378437	0.459136
1.636	0.312273	0.386092
1.637	0.255845	0.32265
1.638	0.199645	0.276702
1.639	0.345393	0.30798
1.64	0.493716	0.351292
1.641	0.491705	0.379745
1.642	0.491573	0.41013
1.643	0.487419	0.442048
1.644	0.5782	0.391122
1.645	0.675696	0.344749
1.646	0.695884	0.33386
1.647	0.719473	0.324167
1.648	0.739963	0.314335
1.649	0.795714	0.319687
1.65	0.862043	0.326939
1.651	0.860346	0.320919
1.652	0.854083	0.314586
1.653	0.848908	0.308717
1.654	0.873163	0.292746
1.655	0.89853	0.279117
1.656	0.862052	0.283464
1.657	0.816018	0.287098
1.658	0.763665	0.291301
1.659	0.757916	0.293737
1.66	0.744891	0.296237
1.661	0.697267	0.298389
1.662	0.680319	0.299889
1.663	0.659444	0.301869
1.664	0.663197	0.293737
1.665	0.665634	0.286629
1.666	0.626982	0.297508
1.667	0.580353	0.310383
1.668	0.561725	0.324232
1.669	0.556184	0.309861
1.67	0.545519	0.296924
1.671	0.496496	0.289878
1.672	0.440878	0.28402
1.673	0.416701	0.276702
1.674	0.357009	0.277447
1.675	0.303716	0.278862
1.676	0.335952	0.28247
1.677	0.370411	0.286403
1.678	0.403045	0.290861
1.679	0.361864	0.288487
1.68	0.322504	0.286182
1.681	0.306127	0.282005
1.682	0.276571	0.277897
1.683	0.27655	0.273861
1.684	0.293308	0.270604
1.685	0.288407	0.267445
1.686	0.305791	0.291078
1.687	0.32536	0.323847
1.688	0.334877	0.363808
1.689	0.376494	0.332963
1.69	0.42553	0.305842
1.691	0.466997	0.313636
1.692	0.501277	0.322187
1.693	0.53016	0.330891
1.694	0.579002	0.325279
1.695	0.612577	0.319924
1.696	0.576836	0.302335
1.697	0.536291	0.28836
1.698	0.49849	0.276417
1.699	0.56069	0.332904
1.7	0.626066	0.41086
1.701	0.704322	0.37545
1.702	0.782874	0.342534
1.703	0.849708	0.313379
1.704	0.840564	0.302099
1.705	0.82939	0.291529
1.706	0.805484	0.294563
1.707	0.77845	0.297508
1.708	0.741445	0.300793
1.709	0.678747	0.285756
1.71	0.611453	0.273202
1.711	0.542277	0.292063
1.712	0.473402	0.315786
1.713	0.40615	0.344129
1.714	0.373689	0.337129
1.715	0.351331	0.330494
1.716	0.323331	0.371694
1.717	0.307781	0.417979
1.718	0.280441	0.46696
1.719	0.279612	0.40624
1.72	0.262141	0.351292
1.721	0.316715	0.336
1.722	0.376954	0.321449
1.723	0.437329	0.308717
1.724	0.448082	0.316741
1.725	0.454991	0.325279
1.726	0.456218	0.32942
1.727	0.458792	0.333429
1.728	0.459674	0.337734
1.729	0.429375	0.307287
1.73	0.39397	0.28271
1.731	0.481897	0.306849
1.732	0.574477	0.336749
1.733	0.65852	0.371519
1.734	0.499733	0.306431
1.735	0.352864	0.265121
1.736	0.367194	0.28107
1.737	0.395193	0.303649
1.738	0.416192	0.331521
1.739	0.461635	0.372628
1.74	0.496808	0.417979
1.741	0.533564	0.415013
1.742	0.538076	0.411046
1.743	0.572433	0.408297
1.744	0.685175	0.374218
1.745	0.792629	0.343366
1.746	0.768188	0.344331
1.747	0.742614	0.344538
1.748	0.714898	0.344538
1.749	0.65552	0.331964
1.75	0.597371	0.318787
1.751	0.548486	0.301644
1.752	0.514422	0.286861
1.753	0.479602	0.275329
1.754	0.38782	0.299481
1.755	0.291166	0.33174
1.756	0.362635	0.333221
1.757	0.405118	0.335162
1.758	0.456357	0.337326
1.759	0.387367	0.29669
1.76	0.318966	0.267687
1.761	0.242687	0.29924
1.762	0.171144	0.345607
1.763	0.126292	0.401373
1.764	0.107742	0.378519
1.765	0.0861122	0.357071
1.766	0.122196	0.354746
1.767	0.15375	0.352615
1.768	0.183075	0.350324
1.769	0.178537	0.309437
1.77	0.16964	0.27813
1.771	0.192354	0.276829
1.772	0.204017	0.275802
1.773	0.234621	0.275862
1.774	0.283954	0.283725
1.775	0.330853	0.292243
1.776	0.374557	0.296924
1.777	0.413096	0.301869
1.778	0.457445	0.30798
1.779	0.448749	0.319228
1.78	0.429307	0.330494
1.781	0.460033	0.352615
1.782	0.490604	0.376224
1.783	0.530677	0.40153
1.784	0.522861	0.346735
1.785	0.507944	0.301209
1.786	0.48634	0.3125
1.787	0.461673	0.324637
1.788	0.42753	0.337129
1.789	0.52465	0.309861
1.79	0.635901	0.28734
1.791	0.703495	0.291692
1.792	0.738898	0.295142
1.793	0.798432	0.297912
1.794	0.743785	0.295426
1.795	0.705263	0.292
1.796	0.697669	0.300347
1.797	0.669433	0.309832
1.798	0.655016	0.319687
1.799	0.606978	0.317224
1.8	0.574409	0.312712
1.801	0.554562	0.302579
1.802	0.529142	0.294563
1.803	0.505977	0.286861
1.804	0.420928	0.291529
1.805	0.356886	0.296237
1.806	0.362158	0.291301
1.807	0.361989	0.286629
1.808	0.366091	0.28271
1.809	0.265027	0.275329
1.81	0.173938	0.268712
1.811	0.237109	0.273877
1.812	0.317369	0.280447
1.813	0.366249	0.28734
1.814	0.443956	0.331521
1.815	0.517597	0.387177
1.816	0.492465	0.386994
1.817	0.458271	0.386814
1.818	0.431722	0.386994
1.819	0.383078	0.364495
1.82	0.331952	0.343932
1.821	0.286055	0.324846
1.822	0.258036	0.307513
1.823	0.207	0.291762
1.824	0.207988	0.2988
1.825	0.209473	0.306033
1.826	0.223024	0.300593
1.827	0.247995	0.295595
1.828	0.2641	0.291762
1.829	0.264314	0.320595
1.83	0.310434	0.358199
1.831	0.31673	0.386814
1.832	0.332968	0.417165
1.833	0.311764	0.449474
1.834	0.430176	0.417165
1.835	0.548702	0.386299
1.836	0.534039	0.381319
1.837	0.521353	0.376741
1.838	0.531738	0.371694
1.839	0.501092	0.382902
1.84	0.452363	0.394367
1.841	0.458101	0.396908
1.842	0.471147	0.399461
1.843	0.499381	0.40153
1.844	0.492068	0.371183
1.845	0.457686	0.343011
1.846	0.43973	0.336387
1.847	0.408305	0.329583
1.848	0.371249	0.322965
1.849	0.336589	0.31704
1.85	0.281554	0.311328
1.851	0.281931	0.307341
1.852	0.266533	0.303454
1.853	0.25568	0.300023
1.854	0.259246	0.302903
1.855	0.272379	0.305125
1.856	0.273484	0.308725
1.857	0.281709	0.312588
1.858	0.293843	0.316704
1.859	0.313505	0.306033
1.86	0.32448	0.295193
1.861	0.419753	0.317214
1.862	0.537347	0.342511
1.863	0.6551	0.370559
1.864	0.603768	0.343011
1.865	0.538412	0.317962
1.866	0.513739	0.324637
1.867	0.490304	0.330891
1.868	0.471829	0.337734
1.869	0.553395	0.347895
1.87	0.63393	0.35743
1.871	0.575848	0.4038
1.872	0.535293	0.45457
1.873	0.492633	0.508406
1.874	0.614562	0.437064
1.875	0.674493	0.371519
1.876	0.617677	0.359769
1.877	0.541662	0.348235
1.878	0.493161	0.337528
1.879	0.515291	0.315406
1.88	0.525474	0.295595
1.881	0.475996	0.29024
1.882	0.421264	0.285966
1.883	0.375828	0.282234
1.884	0.292386	0.271848
1.885	0.235497	0.263925
1.886	0.19063	0.292269
1.887	0.157556	0.33477
1.888	0.104707	0.386135
1.889	0.171398	0.346735
1.89	0.235555	0.312292
1.891	0.216494	0.308293
1.892	0.201145	0.304392
1.893	0.187745	0.300593
1.894	0.30048	0.287663
1.895	0.389866	0.276612
1.896	0.398404	0.286885
1.897	0.385855	0.298636
1.898	0.37216	0.311892
1.899	0.530666	0.319005
1.9	0.644362	0.32573
1.901	0.673548	0.33386
1.902	0.693848	0.342534
1.903	0.731885	0.35109
1.904	0.732308	0.344331
1.905	0.721939	0.337734
1.906	0.746401	0.311947
1.907	0.77928	0.28936
1.908	0.807019	0.271339
1.909	0.719617	0.281916
1.91	0.653312	0.293268
1.911	0.630413	0.296509
1.912	0.607702	0.299862
1.913	0.585214	0.303585
1.914	0.510672	0.293811
1.915	0.455362	0.284542
1.916	0.462311	0.27862
1.917	0.475911	0.273793
1.918	0.489744	0.269258
1.919	0.480403	0.267538
1.92	0.471507	0.265906
1.921	0.45045	0.26478
1.922	0.426294	0.263187
1.923	0.413763	0.262158
1.924	0.438761	0.268747
1.925	0.451072	0.277447
1.926	0.395007	0.276365
1.927	0.342198	0.274871
1.928	0.289422	0.273636
1.929	0.272365	0.272075
1.93	0.266961	0.270142
1.931	0.275244	0.277669
1.932	0.276112	0.286403
1.933	0.259828	0.297164
1.934	0.22511	0.303894
1.935	0.169554	0.312292
1.936	0.187729	0.306431
1.937	0.221129	0.301209
1.938	0.263836	0.295595
1.939	0.313952	0.309233
1.94	0.364561	0.324037
1.941	0.440407	0.322187
1.942	0.547331	0.320163
1.943	0.649032	0.318161
1.944	0.700232	0.346735
1.945	0.754007	0.378682
1.946	0.779355	0.343366
1.947	0.804299	0.312292
1.948	0.841045	0.286403
1.949	0.750731	0.309033
1.95	0.64913	0.336387
1.951	0.629975	0.319048
1.952	0.615831	0.303454
1.953	0.607968	0.290043
1.954	0.563638	0.292684
1.955	0.519424	0.295595
1.956	0.496208	0.301209
1.957	0.460133	0.307287
1.958	0.449217	0.31293
1.959	0.461781	0.32506
1.96	0.477875	0.338378
1.961	0.493234	0.3262
1.962	0.506372	0.314841
1.963	0.511468	0.302575
1.964	0.504063	0.297408
1.965	0.49601	0.291301
1.966	0.454036	0.306849
1.967	0.423358	0.324846
1.968	0.386379	0.344538
1.969	0.363203	0.354932
1.97	0.346268	0.365248
1.971	0.284402	0.32506
1.972	0.226806	0.291301
1.973	0.162785	0.267687
1.974	0.213931	0.29669
1.975	0.262522	0.337326
1.976	0.242024	0.34355
1.977	0.22029	0.349967
1.978	0.193706	0.356899
1.979	0.107891	0.343011
1.98	0.0251515	0.329756
1.981	0.0689852	0.321252
1.982	0.112843	0.313267
1.983	0.155799	0.305474
1.984	0.174449	0.292489
1.985	0.201602	0.280936
1.986	0.19955	0.27933
1.987	0.207081	0.277954
1.988	0.214872	0.276612
1.989	0.188241	0.302903
1.99	0.156111	0.336213
1.991	0.224412	0.317579
1.992	0.269743	0.300793
1.993	0.309271	0.286403
1.994	0.328133	0.276431
1.995	0.321854	0.267687
1.996	0.396249	0.278613
1.997	0.483294	0.291762
1.998	0.568605	0.307287
[truncated: 3,002 more rows]

## Sheet: d18OT
Age (Ma)	d18OT (per mil)	d18OT (per mil) 1 sigma
0	3.18	0.0554632
0.001	3.24608	0.0475277
0.002	3.21705	0.0346561
0.003	3.19826	0.0274981
0.004	3.22272	0.0381063
0.005	3.21992	0.0566753
0.006	3.23472	0.0582061
0.007	3.20868	0.0612688
0.008	3.22697	0.0737741
0.009	3.25739	0.0847918
0.01	3.34601	0.10107
0.011	3.40186	0.0981899
0.012	3.52248	0.0928259
0.013	3.63356	0.0974066
0.014	3.69899	0.0946878
0.015	3.8	0.107745
0.016	3.87862	0.135783
0.017	3.91948	0.156637
0.018	3.9455	0.151437
0.019	4.00074	0.145744
0.02	3.99603	0.131099
0.021	3.97477	0.139451
0.022	3.98463	0.147998
0.023	4.01339	0.147955
0.024	4.00528	0.133151
0.025	4.00704	0.115154
0.026	4.03111	0.128225
0.027	4.03677	0.142657
0.028	3.99262	0.12985
0.029	3.96349	0.0813057
0.03	3.9966	0.0859666
0.031	3.99508	0.0924498
0.032	3.9436	0.0816703
0.033	3.95688	0.0888349
0.034	3.96183	0.0756481
0.035	3.9426	0.0691852
0.036	3.97718	0.0698694
0.037	4.00156	0.0793376
0.038	3.98767	0.085083
0.039	4.01285	0.0954062
0.04	3.98333	0.0781112
0.041	3.97968	0.0787465
0.042	3.9664	0.0736998
0.043	3.92696	0.0676295
0.044	3.93783	0.0647007
0.045	3.92609	0.0710027
0.046	3.96483	0.0771773
0.047	3.96923	0.064798
0.048	3.94848	0.0744728
0.049	3.89944	0.0622179
0.05	3.89011	0.0705499
0.051	3.86002	0.0694821
0.052	3.87189	0.0676464
0.053	3.89238	0.0733015
0.054	3.86989	0.0761031
0.055	3.86615	0.0767433
0.056	3.86292	0.07257
0.057	3.8761	0.0775036
0.058	3.91546	0.0780031
0.059	3.92646	0.0714278
0.06	3.95785	0.0773959
0.061	3.9475	0.0819172
0.062	3.96846	0.0714553
0.063	3.99878	0.11332
0.064	3.96544	0.101104
0.065	3.95729	0.120918
0.066	3.96749	0.118714
0.067	3.93141	0.102159
0.068	3.90193	0.0911889
0.069	3.88015	0.0824811
0.07	3.84427	0.0915904
0.071	3.80742	0.0982118
0.072	3.78501	0.102476
0.073	3.71497	0.0920905
0.074	3.68343	0.0853857
0.075	3.63314	0.0879229
0.076	3.61648	0.0903216
0.077	3.62485	0.077223
0.078	3.61629	0.0860713
0.079	3.56581	0.0786621
0.08	3.50251	0.0741929
0.081	3.48387	0.0689757
0.082	3.47952	0.0750543
0.083	3.48018	0.0736531
0.084	3.50366	0.0893432
0.085	3.53219	0.0890566
0.086	3.5346	0.0892652
0.087	3.56851	0.0892177
0.088	3.55937	0.089147
0.089	3.54566	0.0962359
0.09	3.51451	0.0969062
0.091	3.50389	0.0972032
0.092	3.47965	0.100213
0.093	3.46498	0.0963371
0.094	3.45335	0.104424
0.095	3.43438	0.103951
0.096	3.39551	0.100977
0.097	3.37599	0.115734
0.098	3.36142	0.0945787
0.099	3.36855	0.104974
0.1	3.32647	0.107776
0.101	3.34397	0.10744
0.102	3.34118	0.105754
0.103	3.32924	0.101986
0.104	3.31369	0.0906618
0.105	3.34416	0.0917172
0.106	3.38599	0.0979459
0.107	3.44092	0.0953119
0.108	3.45964	0.0903054
0.109	3.43782	0.0840061
0.11	3.45973	0.0865092
0.111	3.44903	0.100285
0.112	3.395	0.0925341
0.113	3.3925	0.103023
0.114	3.38	0.109922
0.115	3.38	0.120107
0.116	3.355	0.120415
0.117	3.305	0.0983015
0.118	3.255	0.0958198
0.119	3.23	0.0912385
0.12	3.18	0.0734
0.121	3.13	0.0755832
0.122	3.105	0.0731383
0.123	3.08	0.08018
0.124	3.055	0.0787516
0.125	3.055	0.0824734
0.126	3.055	0.108885
0.127	3.055	0.110915
0.128	3.105	0.122938
0.129	3.155	0.166573
0.13	3.28	0.173806
0.131	3.46671	0.153332
0.132	3.52171	0.153417
0.133	3.59591	0.159985
0.134	3.64862	0.15011
0.135	3.69705	0.136511
0.136	3.70939	0.113009
0.137	3.74234	0.106864
0.138	3.76963	0.103391
0.139	3.79969	0.0903917
0.14	3.79178	0.0976685
0.141	3.79192	0.0961626
0.142	3.81049	0.127836
0.143	3.81112	0.14839
0.144	3.84491	0.162214
0.145	3.81671	0.134129
0.146	3.79194	0.109314
0.147	3.81413	0.121911
0.148	3.82274	0.100275
0.149	3.81608	0.093551
0.15	3.84071	0.110668
0.151	3.8217	0.104482
0.152	3.80244	0.0931093
0.153	3.83337	0.125959
0.154	3.9078	0.141057
0.155	3.9374	0.144873
0.156	3.93332	0.141789
0.157	3.98041	0.140054
0.158	3.96415	0.137346
0.159	3.93511	0.123515
0.16	3.86031	0.1109
0.161	3.80782	0.105979
0.162	3.85927	0.104052
0.163	3.85279	0.0868535
0.164	3.82812	0.0824694
0.165	3.82764	0.0957497
0.166	3.84155	0.122317
0.167	3.87419	0.107099
0.168	3.90248	0.111256
0.169	3.80509	0.0956704
0.17	3.78853	0.0760139
0.171	3.77047	0.0700948
0.172	3.80489	0.101922
0.173	3.78985	0.100228
0.174	3.80431	0.108202
0.175	3.81466	0.136566
0.176	3.76891	0.15053
0.177	3.77846	0.160899
0.178	3.79443	0.140059
0.179	3.74674	0.111183
0.18	3.74115	0.103135
0.181	3.77764	0.103994
0.182	3.81015	0.108809
0.183	3.78574	0.0982883
0.184	3.75344	0.10354
0.185	3.73259	0.104912
0.186	3.72665	0.10279
0.187	3.7103	0.0922843
0.188	3.67672	0.0890994
0.189	3.66601	0.0777121
0.19	3.66058	0.0857107
0.191	3.62012	0.0834656
0.192	3.55947	0.0976119
0.193	3.59277	0.107373
0.194	3.58643	0.106079
0.195	3.57998	0.102698
0.196	3.55936	0.100184
0.197	3.53107	0.0961842
0.198	3.47731	0.094017
0.199	3.45751	0.0926876
0.2	3.45044	0.0895479
0.201	3.43184	0.085323
0.202	3.40602	0.0837634
0.203	3.3864	0.0838066
0.204	3.39862	0.0875534
0.205	3.41085	0.0825287
0.206	3.41025	0.0900405
0.207	3.39801	0.0862307
0.208	3.37278	0.0887541
0.209	3.36632	0.100074
0.21	3.3699	0.111464
0.211	3.35701	0.109913
0.212	3.34831	0.115308
0.213	3.33397	0.126246
0.214	3.35732	0.119947
0.215	3.36842	0.1101
0.216	3.36699	0.106466
0.217	3.40941	0.105626
0.218	3.46163	0.0991475
0.219	3.54936	0.0989703
0.22	3.59764	0.0990989
0.221	3.62087	0.0997667
0.222	3.66263	0.10218
0.223	3.67561	0.102401
0.224	3.66769	0.100617
0.225	3.66883	0.101167
0.226	3.67489	0.103404
0.227	3.66058	0.107944
0.228	3.66308	0.113157
0.229	3.65597	0.111907
0.23	3.6474	0.105689
0.231	3.62057	0.104884
0.232	3.58176	0.113421
0.233	3.57702	0.118486
0.234	3.56525	0.119593
0.235	3.5451	0.117755
0.236	3.5083	0.118142
0.237	3.45475	0.121269
0.238	3.42261	0.127039
0.239	3.3849	0.129502
0.24	3.37158	0.12642
0.241	3.38719	0.124799
0.242	3.45305	0.126714
0.243	3.5071	0.118966
0.244	3.53912	0.119849
0.245	3.52869	0.129481
0.246	3.616	0.112906
0.247	3.68415	0.105739
0.248	3.73276	0.101698
0.249	3.77002	0.096747
0.25	3.78557	0.0930387
0.251	3.82443	0.100504
0.252	3.79812	0.0921683
0.253	3.82745	0.10133
0.254	3.84429	0.104537
0.255	3.82728	0.0978965
0.256	3.82529	0.103852
0.257	3.82081	0.0951708
0.258	3.82494	0.0943061
0.259	3.82474	0.0923008
0.26	3.84147	0.0871811
0.261	3.84911	0.0898168
0.262	3.89158	0.105225
0.263	3.8473	0.103104
0.264	3.88326	0.111579
0.265	3.87529	0.105581
0.266	3.88459	0.110214
0.267	3.91182	0.116405
0.268	3.93814	0.12781
0.269	3.97562	0.127727
0.27	3.94464	0.131595
0.271	3.91438	0.141827
0.272	3.90047	0.138606
0.273	3.95386	0.145966
0.274	3.92467	0.144286
0.275	3.89127	0.138532
0.276	3.88869	0.138329
0.277	3.84748	0.136753
0.278	3.82467	0.131395
0.279	3.81053	0.13242
0.28	3.78226	0.13386
0.281	3.77734	0.126854
0.282	3.72955	0.119146
0.283	3.6739	0.116512
0.284	3.62675	0.12014
0.285	3.60223	0.115897
0.286	3.59198	0.114564
0.287	3.59976	0.107646
0.288	3.6367	0.095916
0.289	3.62928	0.10067
0.29	3.65373	0.0987131
0.291	3.66937	0.0934857
0.292	3.70444	0.0960237
0.293	3.76991	0.0971332
0.294	3.7689	0.0931037
0.295	3.75816	0.103622
0.296	3.71731	0.105821
0.297	3.72683	0.0940993
0.298	3.70595	0.0958105
0.299	3.70503	0.106414
0.3	3.71571	0.105746
0.301	3.69254	0.102771
0.302	3.67367	0.100945
0.303	3.64697	0.099109
0.304	3.62509	0.0973949
0.305	3.62216	0.0962242
0.306	3.6065	0.0990884
0.307	3.60853	0.0958327
0.308	3.56134	0.0941826
0.309	3.52876	0.0969426
0.31	3.51545	0.0967372
0.311	3.49422	0.093382
0.312	3.47971	0.088362
0.313	3.44254	0.0989199
0.314	3.45482	0.0854519
0.315	3.48784	0.0853422
0.316	3.48869	0.0868087
0.317	3.49353	0.0870938
0.318	3.50427	0.0907082
0.319	3.46006	0.0907348
0.32	3.41498	0.100976
0.321	3.38101	0.0986664
0.322	3.35364	0.0981792
0.323	3.34184	0.0941391
0.324	3.31542	0.0985134
0.325	3.29366	0.10356
0.326	3.26009	0.111125
0.327	3.26307	0.11277
0.328	3.2313	0.114759
0.329	3.20472	0.111683
0.33	3.20729	0.107123
0.331	3.19841	0.112613
0.332	3.21964	0.117729
0.333	3.29503	0.113271
0.334	3.3396	0.121451
0.335	3.43191	0.11844
0.336	3.49071	0.115183
0.337	3.59961	0.125613
0.338	3.62242	0.137142
0.339	3.69686	0.139669
0.34	3.742	0.162271
0.341	3.83426	0.152768
0.342	3.86804	0.157217
0.343	3.84671	0.15451
0.344	3.86734	0.146466
0.345	3.90699	0.144835
0.346	3.92521	0.141503
0.347	3.92741	0.127064
0.348	3.92078	0.112706
0.349	3.89509	0.103341
0.35	3.91612	0.0944016
0.351	3.94	0.110279
0.352	3.91867	0.114003
0.353	3.90405	0.124131
0.354	3.9319	0.131419
0.355	3.97061	0.130384
0.356	3.93951	0.139725
0.357	3.94693	0.129392
0.358	3.90654	0.124997
0.359	3.90969	0.118732
0.36	3.87394	0.118124
0.361	3.93196	0.113081
0.362	3.99419	0.13323
0.363	3.99309	0.127746
0.364	3.96322	0.129006
0.365	3.97733	0.123345
0.366	3.96203	0.121143
0.367	3.96057	0.12054
0.368	3.96222	0.127448
0.369	3.92175	0.123797
0.37	3.91159	0.117709
0.371	3.89485	0.112754
0.372	3.89882	0.104703
0.373	3.94548	0.121932
0.374	3.91932	0.121617
0.375	3.89792	0.121024
0.376	3.87438	0.117242
0.377	3.82757	0.11866
0.378	3.7999	0.113809
0.379	3.75488	0.110953
0.38	3.72988	0.106653
0.381	3.71109	0.102704
0.382	3.7107	0.0985452
0.383	3.6837	0.0974471
0.384	3.67447	0.108926
0.385	3.70233	0.130244
0.386	3.72193	0.146653
0.387	3.58513	0.0950973
0.388	3.62065	0.106353
0.389	3.60713	0.104389
0.39	3.58154	0.108892
0.391	3.54235	0.121575
0.392	3.48296	0.131652
0.393	3.49561	0.126171
0.394	3.5033	0.121873
0.395	3.48414	0.114834
0.396	3.51067	0.115274
0.397	3.41202	0.127404
0.398	3.42956	0.132451
0.399	3.38488	0.132474
0.4	3.31674	0.137923
0.401	3.26589	0.141394
0.402	3.20324	0.147654
0.403	3.11137	0.170113
0.404	3.05415	0.191818
0.405	3.11723	0.146582
0.406	3.14012	0.126438
0.407	3.13063	0.116669
0.408	3.13666	0.110548
0.409	3.10804	0.120669
0.41	3.14999	0.103397
0.411	3.20856	0.0949715
0.412	3.20929	0.100819
0.413	3.17287	0.123323
0.414	3.22911	0.104874
0.415	3.20283	0.127859
0.416	3.22601	0.128793
0.417	3.38395	0.115225
0.418	3.41929	0.126549
0.419	3.46968	0.136083
0.42	3.57306	0.149863
0.421	3.64883	0.1638
0.422	3.70849	0.158559
0.423	3.75402	0.158042
0.424	3.80901	0.166888
0.425	3.83689	0.171712
0.426	3.87002	0.172886
0.427	3.89528	0.170392
0.428	3.93128	0.169953
0.429	3.90403	0.161046
0.43	3.90071	0.149555
0.431	3.95972	0.154353
0.432	3.97972	0.161593
0.433	3.99898	0.155729
0.434	4.01308	0.152873
0.435	4.02567	0.150394
0.436	3.99018	0.1532
0.437	4.03676	0.136988
0.438	4.06058	0.140536
0.439	4.06174	0.142481
0.44	4.03862	0.138567
0.441	4.03872	0.137273
0.442	4.02681	0.140884
0.443	4.04629	0.138712
0.444	4.06107	0.138359
0.445	4.05492	0.13865
0.446	4.06917	0.13667
0.447	4.07533	0.135882
0.448	4.07013	0.137024
0.449	4.04997	0.136088
0.45	4.03767	0.138925
0.451	4.02011	0.134933
0.452	4.03872	0.133295
0.453	4.0774	0.132517
0.454	4.08615	0.133268
0.455	4.09194	0.118381
0.456	4.10735	0.124508
0.457	4.11521	0.126814
0.458	4.09443	0.111194
0.459	4.10331	0.116149
0.46	4.13919	0.120274
0.461	4.17071	0.127354
0.462	4.17243	0.119655
0.463	4.15699	0.124768
0.464	4.12859	0.124897
0.465	4.12002	0.126164
0.466	4.13064	0.126512
0.467	4.11501	0.127151
0.468	4.0978	0.131196
0.469	4.08163	0.131661
0.47	4.04882	0.131443
0.471	4.08238	0.142933
0.472	4.00891	0.132251
0.473	3.98045	0.126686
0.474	3.94139	0.125078
0.475	3.90807	0.128827
0.476	3.89815	0.130523
0.477	3.88286	0.135376
0.478	3.86099	0.138386
0.479	3.81565	0.146507
0.48	3.80193	0.135159
0.481	3.81364	0.134371
0.482	3.77073	0.132821
0.483	3.69982	0.137077
0.484	3.71305	0.129742
0.485	3.72195	0.126845
0.486	3.72681	0.129382
0.487	3.72266	0.131915
0.488	3.70292	0.132482
0.489	3.65274	0.131113
0.49	3.59105	0.130333
0.491	3.57332	0.131712
0.492	3.57249	0.128163
0.493	3.56552	0.1283
0.494	3.54987	0.134149
0.495	3.56334	0.134767
0.496	3.54493	0.140523
0.497	3.52315	0.125602
0.498	3.5184	0.110364
0.499	3.5053	0.109728
0.5	3.52086	0.10819
0.501	3.54045	0.107381
0.502	3.55082	0.108035
0.503	3.55999	0.105554
0.504	3.5742	0.104985
0.505	3.59006	0.106873
0.506	3.60862	0.111494
0.507	3.62925	0.116964
0.508	3.6548	0.124198
0.509	3.69909	0.132665
0.51	3.67424	0.145695
0.511	3.67101	0.148581
0.512	3.67617	0.153049
0.513	3.6891	0.152885
0.514	3.69834	0.155236
0.515	3.70611	0.158122
0.516	3.71597	0.153651
0.517	3.6933	0.156523
0.518	3.70629	0.156249
0.519	3.69551	0.161504
0.52	3.70268	0.161989
0.521	3.70615	0.162907
0.522	3.69515	0.156471
0.523	3.68493	0.154387
0.524	3.6903	0.156856
0.525	3.7029	0.162573
0.526	3.70126	0.170193
0.527	3.71635	0.163767
0.528	3.73792	0.162017
0.529	3.71877	0.155153
0.53	3.75653	0.151843
0.531	3.77235	0.13828
0.532	3.77093	0.12947
0.533	3.81299	0.128114
0.534	3.8358	0.125798
0.535	3.86014	0.122736
0.536	3.87406	0.122195
0.537	3.88171	0.125173
0.538	3.89046	0.13052
0.539	3.91054	0.136943
0.54	3.90595	0.145117
0.541	3.92994	0.142969
0.542	3.93543	0.144652
0.543	3.87792	0.141638
0.544	3.89586	0.137568
0.545	3.86362	0.132112
0.546	3.83086	0.128608
0.547	3.82281	0.125885
0.548	3.8112	0.123908
0.549	3.81349	0.123053
0.55	3.80236	0.12028
0.551	3.80083	0.120449
0.552	3.7895	0.115226
0.553	3.76428	0.113388
0.554	3.72453	0.114837
0.555	3.74068	0.111993
0.556	3.73585	0.112628
0.557	3.74618	0.111148
0.558	3.70499	0.111788
0.559	3.70503	0.111938
0.56	3.66544	0.114021
0.561	3.67114	0.113601
0.562	3.65131	0.113675
0.563	3.63429	0.112266
0.564	3.60446	0.112495
0.565	3.56315	0.112193
0.566	3.53972	0.112838
0.567	3.5087	0.114243
0.568	3.50253	0.107994
0.569	3.5237	0.0979477
0.57	3.5249	0.0955619
0.571	3.52911	0.0981986
0.572	3.5204	0.103378
0.573	3.47326	0.102896
0.574	3.45201	0.101827
0.575	3.42689	0.10048
0.576	3.4247	0.100572
0.577	3.42655	0.0994332
0.578	3.44766	0.100554
0.579	3.45787	0.102224
0.58	3.49298	0.107189
0.581	3.53222	0.117419
0.582	3.53369	0.118062
0.583	3.52716	0.121519
0.584	3.48895	0.113387
0.585	3.49172	0.117084
0.586	3.49072	0.120592
0.587	3.50502	0.124414
0.588	3.51408	0.127519
0.589	3.5007	0.13002
0.59	3.47188	0.134273
0.591	3.48166	0.134081
0.592	3.5255	0.151025
0.593	3.50778	0.133834
0.594	3.4763	0.121862
0.595	3.44117	0.112545
0.596	3.40685	0.108513
0.597	3.40695	0.103083
0.598	3.42299	0.10565
0.599	3.41582	0.105906
0.6	3.41575	0.111091
0.601	3.37244	0.106564
0.602	3.37096	0.105047
0.603	3.35085	0.105653
0.604	3.34488	0.108121
0.605	3.33268	0.109969
0.606	3.32275	0.110112
0.607	3.323	0.110065
0.608	3.34798	0.105828
0.609	3.3685	0.105334
0.61	3.37219	0.108258
0.611	3.38719	0.110107
0.612	3.39926	0.110425
0.613	3.40437	0.110608
0.614	3.42196	0.116083
0.615	3.44501	0.120081
0.616	3.48569	0.139228
0.617	3.50993	0.128192
0.618	3.50079	0.123971
0.619	3.52116	0.123825
0.62	3.53736	0.127008
0.621	3.55856	0.128695
0.622	3.59526	0.129466
0.623	3.6301	0.132242
0.624	3.6763	0.134757
0.625	3.72084	0.141915
0.626	3.74468	0.148728
0.627	3.75763	0.147286
0.628	3.77779	0.154844
0.629	3.79815	0.146686
0.63	3.80797	0.138454
0.631	3.81464	0.131483
0.632	3.80809	0.128838
0.633	3.80002	0.127142
0.634	3.80325	0.128398
0.635	3.79888	0.131513
0.636	3.7942	0.133715
0.637	3.80524	0.133416
0.638	3.77308	0.134585
0.639	3.76975	0.134806
0.64	3.75655	0.136873
0.641	3.74998	0.140837
0.642	3.7476	0.146695
0.643	3.72197	0.153298
0.644	3.71635	0.160756
0.645	3.66398	0.149109
0.646	3.69893	0.135927
0.647	3.70187	0.133557
0.648	3.69855	0.129844
0.649	3.70527	0.127721
0.65	3.72422	0.125935
0.651	3.7144	0.116393
0.652	3.76507	0.123093
0.653	3.73771	0.120839
0.654	3.72267	0.119881
0.655	3.71508	0.121033
0.656	3.68838	0.123258
0.657	3.68938	0.120077
0.658	3.71133	0.117718
0.659	3.71745	0.116169
0.66	3.71927	0.116759
0.661	3.72588	0.11894
0.662	3.73202	0.120008
0.663	3.73925	0.119253
0.664	3.73146	0.115379
0.665	3.72467	0.11351
0.666	3.71308	0.118874
0.667	3.72811	0.122353
0.668	3.72651	0.131749
0.669	3.74688	0.13193
0.67	3.74566	0.135422
0.671	3.74962	0.136194
0.672	3.7513	0.136246
0.673	3.77323	0.136241
0.674	3.75234	0.130988
0.675	3.72412	0.126585
0.676	3.73085	0.120881
0.677	3.69912	0.118312
0.678	3.68205	0.116565
0.679	3.6683	0.119226
0.68	3.66549	0.121323
0.681	3.65402	0.124228
0.682	3.63491	0.121086
0.683	3.5883	0.119259
0.684	3.5888	0.121104
0.685	3.61176	0.124806
0.686	3.61454	0.132406
0.687	3.55408	0.118885
0.688	3.49357	0.115963
0.689	3.39077	0.122584
0.69	3.38618	0.120915
0.691	3.41356	0.122457
0.692	3.41197	0.123642
0.693	3.36599	0.117626
0.694	3.47172	0.152685
0.695	3.46641	0.155159
0.696	3.46683	0.151565
0.697	3.45811	0.142254
0.698	3.42484	0.13687
0.699	3.40335	0.132093
0.7	3.38486	0.130275
0.701	3.38858	0.131029
0.702	3.38299	0.129488
0.703	3.41585	0.144551
0.704	3.39311	0.127387
0.705	3.36677	0.119171
0.706	3.36199	0.106763
0.707	3.38045	0.10431
0.708	3.42501	0.107914
0.709	3.45301	0.1162
0.71	3.48839	0.121632
0.711	3.5223	0.129737
0.712	3.59063	0.141156
0.713	3.6118	0.130309
0.714	3.63389	0.118781
0.715	3.72981	0.124328
0.716	3.72147	0.120453
0.717	3.72987	0.121088
0.718	3.73346	0.119731
0.719	3.73727	0.118587
0.72	3.72984	0.114997
0.721	3.71907	0.11301
0.722	3.71227	0.113143
0.723	3.69063	0.110665
0.724	3.68232	0.11374
0.725	3.67237	0.11776
0.726	3.68354	0.121381
0.727	3.68789	0.122802
0.728	3.68281	0.125247
0.729	3.6681	0.128491
0.73	3.64937	0.130888
0.731	3.62314	0.133415
0.732	3.61372	0.12987
0.733	3.62158	0.124506
0.734	3.60533	0.125321
0.735	3.59677	0.127303
0.736	3.572	0.126828
0.737	3.55661	0.126496
0.738	3.54913	0.121873
0.739	3.55097	0.118843
0.74	3.56236	0.115101
0.741	3.5797	0.113096
0.742	3.59674	0.111696
0.743	3.6059	0.112392
0.744	3.62389	0.114648
0.745	3.63679	0.11753
0.746	3.6655	0.108287
0.747	3.6803	0.100766
0.748	3.66937	0.0933139
0.749	3.64228	0.0871689
0.75	3.62228	0.0816878
0.751	3.61454	0.0769093
0.752	3.61504	0.0736949
0.753	3.62378	0.0783081
0.754	3.61656	0.0776866
0.755	3.62655	0.088234
0.756	3.59895	0.082429
0.757	3.63133	0.0882413
0.758	3.62404	0.100127
0.759	3.65001	0.111387
0.76	3.61018	0.0996613
0.761	3.57605	0.0912186
0.762	3.54119	0.0940971
0.763	3.54833	0.095067
0.764	3.52515	0.0879996
0.765	3.54929	0.0941587
0.766	3.54422	0.0916778
0.767	3.54491	0.0959034
0.768	3.54319	0.0984823
0.769	3.55332	0.0998482
0.77	3.56184	0.100375
0.771	3.55571	0.105691
0.772	3.54012	0.114507
0.773	3.52778	0.117448
0.774	3.50747	0.118383
0.775	3.48441	0.112398
0.776	3.45033	0.108484
0.777	3.4292	0.100331
0.778	3.3855	0.100234
0.779	3.42119	0.102006
0.78	3.39058	0.0959637
0.781	3.35975	0.0915386
0.782	3.339	0.0825172
0.783	3.33143	0.0814433
0.784	3.34383	0.0756013
0.785	3.38127	0.0805845
0.786	3.42072	0.0919247
0.787	3.45113	0.0897702
0.788	3.48315	0.0888709
0.789	3.54149	0.0948021
0.79	3.59548	0.101875
0.791	3.64226	0.110734
0.792	3.65616	0.0993399
0.793	3.73092	0.105507
0.794	3.82861	0.119138
0.795	3.85536	0.113727
0.796	3.87527	0.119209
0.797	3.86469	0.117806
0.798	3.81472	0.107847
0.799	3.8475	0.112069
0.8	3.83312	0.106609
0.801	3.88072	0.120815
0.802	3.85187	0.109511
0.803	3.85123	0.111847
0.804	3.84113	0.109706
0.805	3.85707	0.102989
0.806	3.84646	0.0999705
0.807	3.82636	0.102379
0.808	3.80329	0.102487
0.809	3.78821	0.10341
0.81	3.72066	0.0910862
0.811	3.66054	0.0933914
0.812	3.64004	0.0947528
0.813	3.63862	0.0973759
0.814	3.62324	0.101565
0.815	3.61702	0.0962594
0.816	3.61155	0.0933754
0.817	3.60854	0.0993111
0.818	3.60069	0.109825
0.819	3.5729	0.109394
0.82	3.54292	0.107463
0.821	3.53222	0.103507
0.822	3.51372	0.0997828
0.823	3.50571	0.0959515
0.824	3.50845	0.100598
0.825	3.51658	0.105057
0.826	3.52268	0.109267
0.827	3.51977	0.113306
0.828	3.53363	0.116812
0.829	3.53313	0.117451
0.83	3.53877	0.116502
0.831	3.51066	0.118052
0.832	3.50753	0.115605
0.833	3.47836	0.114483
0.834	3.46323	0.108673
0.835	3.46706	0.10413
0.836	3.45611	0.102686
0.837	3.45845	0.101692
0.838	3.44858	0.103114
0.839	3.44431	0.0964229
0.84	3.43241	0.0916451
0.841	3.41236	0.0863498
0.842	3.38158	0.0826442
0.843	3.37707	0.0799707
0.844	3.34985	0.0803821
0.845	3.34838	0.0789411
0.846	3.34899	0.0780278
0.847	3.35494	0.077819
0.848	3.35956	0.0777448
0.849	3.37328	0.0839849
0.85	3.38184	0.09057
0.851	3.42485	0.0983823
0.852	3.4101	0.0926797
0.853	3.37962	0.0891414
0.854	3.35323	0.0875806
0.855	3.33058	0.0895902
0.856	3.32539	0.0935387
0.857	3.30486	0.0971104
0.858	3.3018	0.0989492
0.859	3.31357	0.094326
0.86	3.31778	0.0925238
0.861	3.35581	0.0953901
0.862	3.40724	0.0951873
0.863	3.44969	0.0974918
0.864	3.49338	0.10105
0.865	3.55195	0.105643
0.866	3.5808	0.101947
0.867	3.62089	0.100976
0.868	3.62119	0.0994845
0.869	3.6495	0.0932962
0.87	3.65662	0.0943899
0.871	3.67784	0.0911485
0.872	3.69689	0.0905922
0.873	3.69744	0.0919009
0.874	3.70454	0.0960611
0.875	3.68684	0.089693
0.876	3.68297	0.0775669
0.877	3.67637	0.0739394
0.878	3.66234	0.0794834
0.879	3.6961	0.0942181
0.88	3.70411	0.099696
0.881	3.74617	0.103239
0.882	3.7293	0.101697
0.883	3.7355	0.0981285
0.884	3.74076	0.0959697
0.885	3.75188	0.093976
0.886	3.74734	0.0943734
0.887	3.7195	0.0968991
0.888	3.7325	0.0948692
0.889	3.69631	0.0875884
0.89	3.68066	0.0832577
0.891	3.64511	0.0824267
0.892	3.63778	0.0814982
0.893	3.63026	0.0808939
0.894	3.62087	0.0798067
0.895	3.61491	0.0790587
0.896	3.61631	0.0792177
0.897	3.61252	0.0776182
0.898	3.60556	0.0766813
0.899	3.5862	0.0758756
0.9	3.58223	0.0748782
0.901	3.56193	0.0746637
0.902	3.55364	0.0750424
0.903	3.52869	0.0765879
0.904	3.51702	0.0778645
0.905	3.51799	0.0755731
0.906	3.51464	0.0750894
0.907	3.51644	0.0749246
0.908	3.50845	0.0729062
0.909	3.5041	0.0716541
0.91	3.4971	0.0737839
0.911	3.48504	0.0674398
0.912	3.50253	0.0660871
0.913	3.52473	0.070005
0.914	3.52471	0.0729161
0.915	3.54434	0.0731065
0.916	3.57395	0.0761737
0.917	3.61298	0.0800955
0.918	3.62447	0.0863998
0.919	3.64495	0.085337
0.92	3.65444	0.0810729
0.921	3.67346	0.0772322
0.922	3.68387	0.0762375
0.923	3.67917	0.074798
0.924	3.67073	0.0745274
0.925	3.65323	0.0760823
0.926	3.64201	0.0781039
0.927	3.64932	0.077295
0.928	3.64211	0.0795156
0.929	3.62691	0.0808427
0.93	3.60325	0.0769574
0.931	3.59435	0.0739066
0.932	3.57338	0.0699918
0.933	3.53315	0.068818
0.934	3.50293	0.0639377
0.935	3.49468	0.0608694
0.936	3.48607	0.0598666
0.937	3.47537	0.0613725
0.938	3.45628	0.0648807
0.939	3.43818	0.0698714
0.94	3.44875	0.0706057
0.941	3.43854	0.0679512
0.942	3.41644	0.0693438
0.943	3.39123	0.0706555
0.944	3.38099	0.0745087
0.945	3.36216	0.080283
0.946	3.35	0.0876322
0.947	3.32955	0.0904183
0.948	3.32205	0.0901414
0.949	3.30659	0.0912911
0.95	3.28327	0.0939331
0.951	3.27882	0.0954628
0.952	3.27972	0.0970258
0.953	3.27689	0.0981594
0.954	3.28263	0.0998113
0.955	3.28462	0.0992187
0.956	3.28906	0.0989686
0.957	3.31047	0.0940789
0.958	3.32832	0.0898934
0.959	3.3212	0.0902022
0.96	3.3239	0.0905211
0.961	3.34532	0.0848736
0.962	3.35631	0.0837804
0.963	3.37587	0.0833302
0.964	3.3992	0.0848567
0.965	3.40641	0.0868907
0.966	3.40502	0.085521
0.967	3.40325	0.0821513
0.968	3.42247	0.0744547
0.969	3.4278	0.0732018
0.97	3.41123	0.0727427
0.971	3.40157	0.0760867
0.972	3.38381	0.080393
0.973	3.39456	0.0802236
0.974	3.39512	0.0824179
0.975	3.39038	0.0815953
0.976	3.39063	0.082493
0.977	3.37964	0.0835446
0.978	3.37677	0.0858215
0.979	3.37623	0.0858068
0.98	3.38939	0.0862174
0.981	3.39674	0.0917335
0.982	3.41037	0.0918979
0.983	3.43877	0.102756
0.984	3.43627	0.107344
0.985	3.43543	0.109699
0.986	3.43625	0.101335
0.987	3.43198	0.0944522
0.988	3.41432	0.0901725
0.989	3.40505	0.0882055
0.99	3.4113	0.088332
0.991	3.41495	0.0913696
0.992	3.39958	0.0856237
0.993	3.39103	0.0847084
0.994	3.365	0.0867337
0.995	3.35473	0.0881905
0.996	3.3378	0.086998
0.997	3.33345	0.0860206
0.998	3.32578	0.081632
0.999	3.32022	0.0769542
1	3.32246	0.0760669
1.001	3.31886	0.0741503
1.002	3.31606	0.0707084
1.003	3.34287	0.0816249
1.004	3.35485	0.077123
1.005	3.35439	0.0761376
1.006	3.35073	0.07627
1.007	3.35204	0.0765856
1.008	3.36225	0.0761305
1.009	3.36799	0.0777914
1.01	3.37492	0.079992
1.011	3.37139	0.0800944
1.012	3.37483	0.0794097
1.013	3.36394	0.0816368
1.014	3.36347	0.0808913
1.015	3.3486	0.080585
1.016	3.34275	0.0801699
1.017	3.3279	0.0816182
1.018	3.32153	0.0796213
1.019	3.30544	0.0806383
1.02	3.30203	0.0825409
1.021	3.28717	0.0812557
1.022	3.271	0.0811748
1.023	3.27568	0.0865332
1.024	3.27385	0.0886131
1.025	3.26434	0.0866911
1.026	3.2556	0.0838158
1.027	3.24514	0.0804912
1.028	3.24468	0.0782322
1.029	3.24459	0.0770866
1.03	3.25545	0.0758211
1.031	3.26742	0.075163
1.032	3.28076	0.0747882
1.033	3.29669	0.0738027
1.034	3.30895	0.0736302
1.035	3.323	0.0735921
1.036	3.34325	0.073409
1.037	3.35295	0.0739374
1.038	3.37274	0.0748847
1.039	3.38165	0.0751897
1.04	3.37097	0.07692
1.041	3.38456	0.0770502
1.042	3.37399	0.0754452
1.043	3.3656	0.0767973
1.044	3.35572	0.0789823
1.045	3.35353	0.08208
1.046	3.36333	0.0837544
1.047	3.37289	0.0833981
1.048	3.38477	0.0810512
1.049	3.38973	0.0775473
1.05	3.3888	0.075992
1.051	3.38963	0.0765774
1.052	3.39851	0.0811463
1.053	3.38897	0.0827826
1.054	3.38657	0.0853979
1.055	3.3653	0.0774311
1.056	3.37581	0.0701471
1.057	3.35716	0.0693691
1.058	3.34816	0.0732651
1.059	3.34816	0.070682
1.06	3.343	0.0726529
1.061	3.3232	0.0758837
1.062	3.29704	0.0743482
1.063	3.27778	0.0720556
1.064	3.25327	0.0750925
1.065	3.22769	0.0758017
1.066	3.2003	0.0735622
1.067	3.18307	0.0706678
1.068	3.1681	0.068314
1.069	3.15592	0.0669289
1.07	3.15181	0.0690215
1.071	3.15493	0.07071
1.072	3.15448	0.0726896
1.073	3.15186	0.0736802
1.074	3.15544	0.0754141
1.075	3.15024	0.071723
1.076	3.14875	0.0672478
1.077	3.15797	0.0638173
1.078	3.15298	0.0614825
1.079	3.1446	0.0580958
1.08	3.13651	0.0562575
1.081	3.13165	0.0557818
1.082	3.13417	0.0570438
1.083	3.14496	0.0598092
1.084	3.15678	0.0646654
1.085	3.16108	0.0622931
1.086	3.19508	0.0587736
1.087	3.2106	0.0572188
1.088	3.23967	0.0521913
1.089	3.24668	0.0537535
1.09	3.26304	0.0549893
1.091	3.26436	0.0560543
1.092	3.26964	0.0576373
1.093	3.29879	0.0566962
1.094	3.31979	0.0589748
1.095	3.34048	0.060902
1.096	3.35362	0.0619912
1.097	3.35677	0.0651249
1.098	3.34281	0.0712273
1.099	3.36115	0.0814603
1.1	3.3438	0.0771318
1.101	3.34339	0.0771109
1.102	3.35466	0.0793651
1.103	3.36552	0.0848559
1.104	3.35681	0.0904685
1.105	3.3391	0.0857866
1.106	3.31176	0.0826247
1.107	3.30083	0.083683
1.108	3.27685	0.0814914
1.109	3.27247	0.0784247
1.11	3.22979	0.069122
1.111	3.25832	0.0677477
1.112	3.2733	0.0654349
1.113	3.29056	0.0644126
1.114	3.30119	0.0640568
1.115	3.30922	0.0641227
1.116	3.32467	0.0649768
1.117	3.33439	0.0615804
1.118	3.33713	0.0593334
1.119	3.35514	0.0586765
1.12	3.36339	0.059736
1.121	3.3852	0.0619772
1.122	3.40698	0.0643017
1.123	3.41634	0.0661346
1.124	3.41336	0.0627166
1.125	3.40769	0.0610324
1.126	3.39419	0.0617472
1.127	3.38542	0.0611155
1.128	3.3823	0.0600742
1.129	3.38883	0.0624298
1.13	3.39626	0.0651039
1.131	3.39598	0.0696524
1.132	3.4113	0.074097
1.133	3.42596	0.0806316
1.134	3.40983	0.0801708
1.135	3.367	0.0800534
1.136	3.39057	0.0736712
1.137	3.39106	0.0735373
1.138	3.4067	0.0726963
1.139	3.3925	0.0723195
1.14	3.37353	0.0740304
1.141	3.34446	0.0769506
1.142	3.34659	0.0732703
1.143	3.334	0.0710115
1.144	3.32928	0.0689725
1.145	3.32342	0.0678291
1.146	3.30974	0.0636142
1.147	3.28877	0.0599276
1.148	3.27189	0.0588709
1.149	3.2532	0.0591268
1.15	3.24402	0.0570984
1.151	3.238	0.0544382
1.152	3.25274	0.0649617
1.153	3.25308	0.0738166
1.154	3.24031	0.0709499
1.155	3.23094	0.0687989
1.156	3.21444	0.0670554
1.157	3.20436	0.0667306
1.158	3.19497	0.0630885
1.159	3.18722	0.06479
1.16	3.1858	0.0665846
1.161	3.18329	0.0684268
1.162	3.17316	0.0666828
1.163	3.16051	0.0667069
1.164	3.16305	0.0670204
1.165	3.15981	0.0680019
1.166	3.15334	0.0685427
1.167	3.15173	0.0711274
1.168	3.15246	0.0724522
1.169	3.14148	0.0742195
1.17	3.14077	0.0744908
1.171	3.14662	0.0745439
1.172	3.14494	0.0740405
1.173	3.14372	0.0737294
1.174	3.13959	0.0735576
1.175	3.14634	0.0745373
1.176	3.14516	0.0755966
1.177	3.14511	0.0760292
1.178	3.14999	0.0749032
1.179	3.1464	0.0748619
1.18	3.1438	0.0749504
1.181	3.12798	0.0701592
1.182	3.1215	0.0642915
1.183	3.11624	0.0592577
1.184	3.12251	0.0557698
1.185	3.11884	0.0548105
1.186	3.12304	0.0540391
1.187	3.12268	0.057899
1.188	3.12341	0.0585849
1.189	3.1323	0.0580345
1.19	3.13549	0.06245
1.191	3.16998	0.0598812
1.192	3.18367	0.0617124
1.193	3.21301	0.0693009
1.194	3.22288	0.0684391
1.195	3.24945	0.0687784
1.196	3.26156	0.0696426
1.197	3.26916	0.0701668
1.198	3.29919	0.0681199
1.199	3.31596	0.0724071
1.2	3.33303	0.0751387
1.201	3.32887	0.0763738
1.202	3.32778	0.0805965
1.203	3.33257	0.0824685
1.204	3.32943	0.0846301
1.205	3.32595	0.086713
1.206	3.32381	0.0871946
1.207	3.30991	0.0847595
1.208	3.29865	0.066672
1.209	3.28428	0.0607053
1.21	3.28882	0.0548684
1.211	3.27871	0.0506715
1.212	3.27428	0.0508288
1.213	3.28919	0.0522043
1.214	3.28845	0.0531972
1.215	3.31092	0.061516
1.216	3.32473	0.0639903
1.217	3.33457	0.0677913
1.218	3.32335	0.0741603
1.219	3.32588	0.0742314
1.22	3.33318	0.0728057
1.221	3.32704	0.0669608
1.222	3.31122	0.0639357
1.223	3.29687	0.0615158
1.224	3.28447	0.0602088
1.225	3.26922	0.0598115
1.226	3.24915	0.0612303
1.227	3.2304	0.0614114
1.228	3.22691	0.0616567
1.229	3.20885	0.0623833
1.23	3.19567	0.0643149
1.231	3.15637	0.0654926
1.232	3.14254	0.0645351
1.233	3.14443	0.0653444
1.234	3.14638	0.0666583
1.235	3.14674	0.068609
1.236	3.14989	0.0709814
1.237	3.15155	0.0729557
1.238	3.16633	0.0760762
1.239	3.17815	0.0804432
1.24	3.18289	0.0812703
1.241	3.19543	0.0782323
1.242	3.22317	0.0805055
1.243	3.2555	0.0824855
1.244	3.28118	0.0797588
1.245	3.31741	0.0778942
1.246	3.35738	0.080946
1.247	3.37401	0.0808657
1.248	3.392	0.0761568
1.249	3.39944	0.0728549
1.25	3.40509	0.0714469
1.251	3.38762	0.0721954
1.252	3.38026	0.072144
1.253	3.40492	0.0720321
1.254	3.4131	0.071684
1.255	3.42481	0.0716014
1.256	3.42859	0.0844834
1.257	3.43004	0.0904488
1.258	3.41995	0.0797597
1.259	3.42062	0.082906
1.26	3.40543	0.0812363
1.261	3.42169	0.0920252
1.262	3.41675	0.0947961
1.263	3.4166	0.0956674
1.264	3.39978	0.0900349
1.265	3.3723	0.0913829
1.266	3.35538	0.08839
1.267	3.34713	0.0844407
1.268	3.34077	0.0807985
1.269	3.34125	0.0810008
1.27	3.32435	0.0829539
1.271	3.31329	0.0828614
1.272	3.2949	0.085172
1.273	3.28744	0.085176
1.274	3.27456	0.0877715
1.275	3.2724	0.0843145
1.276	3.2617	0.0789195
1.277	3.26085	0.0759096
1.278	3.24612	0.0708712
1.279	3.25334	0.0689825
1.28	3.23423	0.063476
1.281	3.24649	0.0656054
1.282	3.26847	0.0735312
1.283	3.27203	0.0772387
1.284	3.28508	0.0873479
1.285	3.28796	0.0895167
1.286	3.29009	0.087942
1.287	3.27326	0.0842574
1.288	3.27802	0.084619
1.289	3.28814	0.0857508
1.29	3.29954	0.0873772
1.291	3.27984	0.0857428
1.292	3.27882	0.0878267
1.293	3.29405	0.0918451
1.294	3.30829	0.0952831
1.295	3.31325	0.0947994
1.296	3.31039	0.0957296
1.297	3.30759	0.090468
1.298	3.31954	0.0914269
1.299	3.31196	0.0784494
1.3	3.30448	0.0700248
1.301	3.29942	0.0659005
1.302	3.29076	0.0652167
1.303	3.28368	0.0669398
1.304	3.27533	0.0675434
1.305	3.26659	0.068173
1.306	3.25015	0.0676622
1.307	3.24097	0.0675552
1.308	3.23101	0.0678275
1.309	3.2167	0.0680305
1.31	3.20379	0.069514
1.311	3.20213	0.0699919
1.312	3.18878	0.0716707
1.313	3.18299	0.0710303
1.314	3.16444	0.077283
1.315	3.14872	0.0760477
1.316	3.13594	0.074098
1.317	3.13398	0.0690582
1.318	3.13078	0.0643656
1.319	3.13326	0.0594567
1.32	3.14993	0.0567579
1.321	3.16366	0.0585967
1.322	3.176	0.0626464
1.323	3.18857	0.0688826
1.324	3.19817	0.0725766
1.325	3.20202	0.0788749
1.326	3.20944	0.0832089
1.327	3.20092	0.0772792
1.328	3.20542	0.0716389
1.329	3.21537	0.0698507
1.33	3.22122	0.064817
1.331	3.2239	0.0620021
1.332	3.22887	0.0591117
1.333	3.24762	0.0621522
1.334	3.27039	0.06625
1.335	3.26103	0.0693422
1.336	3.24399	0.0776719
1.337	3.2668	0.0818764
1.338	3.27573	0.0825364
1.339	3.27822	0.0820998
1.34	3.27816	0.081051
1.341	3.27277	0.0804038
1.342	3.27414	0.0810163
1.343	3.2644	0.0793285
1.344	3.25034	0.07213
1.345	3.21233	0.0706671
1.346	3.20189	0.0660563
1.347	3.18534	0.066881
1.348	3.16987	0.07117
1.349	3.15429	0.0742737
1.35	3.14249	0.0778836
1.351	3.14743	0.0795701
1.352	3.12545	0.0726832
1.353	3.10515	0.0698188
1.354	3.0826	0.0653272
1.355	3.06074	0.062727
1.356	3.06494	0.0648984
1.357	3.06791	0.0688288
1.358	3.05717	0.0708682
1.359	3.05454	0.0707659
1.36	3.05835	0.0625339
1.361	3.0576	0.0636017
1.362	3.05982	0.0624866
1.363	3.0693	0.061116
1.364	3.08882	0.0586075
1.365	3.11093	0.0551693
1.366	3.12983	0.0504053
1.367	3.16048	0.0529202
1.368	3.17463	0.0524434
1.369	3.1895	0.0586291
1.37	3.2228	0.0595703
1.371	3.24572	0.0616888
1.372	3.27235	0.0566662
1.373	3.28708	0.0552492
1.374	3.30301	0.0520412
1.375	3.29828	0.0540539
1.376	3.31331	0.051754
1.377	3.31602	0.0551771
1.378	3.30676	0.0596213
1.379	3.31211	0.0605483
1.38	3.31406	0.0619436
1.381	3.31512	0.0616535
1.382	3.30778	0.0638015
1.383	3.28801	0.0692605
1.384	3.28987	0.0721392
1.385	3.27428	0.0708527
1.386	3.24298	0.080755
1.387	3.23325	0.0792472
1.388	3.23037	0.0769183
1.389	3.22888	0.0755186
1.39	3.21386	0.0734423
1.391	3.19448	0.0745879
1.392	3.18267	0.0739424
1.393	3.17615	0.0747948
1.394	3.18226	0.0732208
1.395	3.19492	0.0744044
1.396	3.18463	0.0726386
1.397	3.17146	0.0788172
1.398	3.16013	0.0833815
1.399	3.16248	0.0818094
1.4	3.17049	0.0798353
1.401	3.17191	0.0775439
1.402	3.17356	0.0751849
1.403	3.17467	0.0745867
1.404	3.18713	0.0741653
1.405	3.20995	0.0700871
1.406	3.22976	0.0710622
1.407	3.24331	0.0722015
1.408	3.23992	0.0686741
1.409	3.21596	0.0629507
1.41	3.21386	0.0629424
1.411	3.21854	0.0690218
1.412	3.22618	0.0691681
1.413	3.22527	0.0704387
1.414	3.19894	0.0791854
1.415	3.19829	0.0786486
1.416	3.18063	0.0811123
1.417	3.16748	0.0846544
1.418	3.18209	0.0844523
1.419	3.1865	0.0793255
1.42	3.18072	0.0784221
1.421	3.17275	0.0815377
1.422	3.16933	0.0891496
1.423	3.16979	0.0819822
1.424	3.16617	0.0753061
1.425	3.15646	0.0668209
1.426	3.15459	0.0638861
1.427	3.15194	0.0627938
1.428	3.14555	0.0623678
1.429	3.14684	0.0608951
1.43	3.15213	0.0597335
1.431	3.1334	0.0560173
1.432	3.12199	0.0555552
1.433	3.11456	0.0556971
1.434	3.09288	0.0524007
1.435	3.08816	0.053388
1.436	3.09478	0.0534368
1.437	3.0881	0.0554434
1.438	3.08933	0.0567098
1.439	3.0873	0.0592093
1.44	3.08606	0.058574
1.441	3.07541	0.0612208
1.442	3.07632	0.0609589
1.443	3.0735	0.0601637
1.444	3.07261	0.0602572
1.445	3.06475	0.0616446
1.446	3.06777	0.0627222
1.447	3.07005	0.0632039
1.448	3.07812	0.0635155
1.449	3.08985	0.0622307
1.45	3.11489	0.0610991
1.451	3.13939	0.0613211
1.452	3.16812	0.0614707
1.453	3.2165	0.0641554
1.454	3.23825	0.0620489
1.455	3.26693	0.0614127
1.456	3.25911	0.0598888
1.457	3.25342	0.0582555
1.458	3.25813	0.0582277
1.459	3.27062	0.057223
1.46	3.26819	0.0594933
1.461	3.27949	0.0626262
1.462	3.28691	0.0672674
1.463	3.27933	0.0683902
1.464	3.26945	0.0703736
1.465	3.25571	0.0732163
1.466	3.23821	0.0756013
1.467	3.23157	0.0772167
1.468	3.22306	0.0793013
1.469	3.20753	0.0777406
1.47	3.19991	0.0718339
1.471	3.18861	0.0671402
1.472	3.18185	0.0629578
1.473	3.17418	0.0603517
1.474	3.16633	0.0590468
1.475	3.15235	0.0599431
1.476	3.13956	0.0564398
1.477	3.12533	0.0563316
1.478	3.11271	0.0567647
1.479	3.10552	0.0580805
1.48	3.10624	0.0596044
1.481	3.09383	0.062147
1.482	3.08651	0.0643878
1.483	3.08487	0.0645316
1.484	3.0754	0.0646797
1.485	3.06693	0.0650246
1.486	3.06605	0.0642376
1.487	3.06197	0.0625968
1.488	3.06919	0.0600905
1.489	3.08615	0.05792
1.49	3.10498	0.0573466
1.491	3.11872	0.0603397
1.492	3.13405	0.0625178
1.493	3.14627	0.0629889
1.494	3.15983	0.0638422
1.495	3.17108	0.0671004
1.496	3.18186	0.0696706
1.497	3.20879	0.0728755
1.498	3.21721	0.0731306
1.499	3.22022	0.0739565
1.5	3.21197	0.073097
1.501	3.21171	0.0751547
1.502	3.21275	0.0751068
1.503	3.2205	0.0750807
1.504	3.22253	0.0723225
1.505	3.22487	0.0700682
1.506	3.22081	0.0670565
1.507	3.21352	0.0682869
1.508	3.21128	0.069419
1.509	3.20532	0.0716883
1.51	3.19719	0.0675349
1.511	3.19298	0.0644489
1.512	3.17628	0.0636384
1.513	3.16591	0.0634638
1.514	3.15798	0.0630378
1.515	3.15437	0.0629534
1.516	3.15301	0.0636768
1.517	3.15482	0.0643516
1.518	3.14516	0.0653125
1.519	3.14271	0.0687823
1.52	3.1455	0.0711822
1.521	3.14071	0.0729088
1.522	3.15908	0.0734413
1.523	3.15675	0.0715261
1.524	3.15627	0.0717615
1.525	3.16706	0.0750307
1.526	3.17107	0.0770669
1.527	3.17689	0.0749765
1.528	3.16847	0.0723599
1.529	3.20578	0.0715028
1.53	3.21243	0.0720079
1.531	3.23626	0.071675
1.532	3.24186	0.0695221
1.533	3.25732	0.0604629
1.534	3.27026	0.0573167
1.535	3.27493	0.05496
1.536	3.27535	0.0542869
1.537	3.29381	0.0596195
1.538	3.29254	0.0557453
1.539	3.28267	0.0554449
1.54	3.2725	0.0573083
1.541	3.27675	0.056465
1.542	3.27246	0.0602838
1.543	3.27159	0.0616536
1.544	3.27265	0.0646478
1.545	3.26464	0.0695579
1.546	3.25428	0.0710467
1.547	3.25639	0.0708946
1.548	3.25071	0.0754199
1.549	3.23556	0.0710483
1.55	3.21436	0.06689
1.551	3.18016	0.0651321
1.552	3.18741	0.0650497
1.553	3.19865	0.0677647
1.554	3.20193	0.0628439
1.555	3.20304	0.0617912
1.556	3.20402	0.0590684
1.557	3.19267	0.0598905
1.558	3.1599	0.0547916
1.559	3.13951	0.0522536
1.56	3.13087	0.0522873
1.561	3.12781	0.0534393
1.562	3.12828	0.0554262
1.563	3.12639	0.0544218
1.564	3.11722	0.0547888
1.565	3.12472	0.0567597
1.566	3.12004	0.0593991
1.567	3.12937	0.0598726
1.568	3.14107	0.0599223
1.569	3.14533	0.0587472
1.57	3.16141	0.0567711
1.571	3.16601	0.0583378
1.572	3.1832	0.0564305
1.573	3.18908	0.0587988
1.574	3.20425	0.0579484
1.575	3.21782	0.0586919
1.576	3.20268	0.0585298
1.577	3.19902	0.0630519
1.578	3.2296	0.0622618
1.579	3.22608	0.0635783
1.58	3.22109	0.0659886
1.581	3.20752	0.068711
1.582	3.20043	0.0654792
1.583	3.18393	0.0656302
1.584	3.16852	0.0671278
1.585	3.15594	0.0675723
1.586	3.16074	0.068241
1.587	3.16872	0.0691321
1.588	3.17891	0.0692868
1.589	3.17591	0.068356
1.59	3.18146	0.0697273
1.591	3.1989	0.0740562
1.592	3.18976	0.0718883
1.593	3.16972	0.0688953
1.594	3.15339	0.0717967
1.595	3.15317	0.0696996
1.596	3.15643	0.0711073
1.597	3.1562	0.0739256
1.598	3.14992	0.0687857
1.599	3.14123	0.0637169
1.6	3.1363	0.064402
1.601	3.13198	0.0678859
1.602	3.1261	0.0721729
1.603	3.11979	0.0774048
1.604	3.11798	0.0813637
1.605	3.10854	0.083486
1.606	3.11058	0.0753459
1.607	3.10915	0.0677864
1.608	3.10725	0.0629847
1.609	3.10955	0.0590715
1.61	3.11307	0.0577773
1.611	3.10997	0.0561318
1.612	3.1082	0.0542434
1.613	3.11284	0.0523805
1.614	3.10906	0.0523713
1.615	3.10827	0.0533416
1.616	3.1105	0.0537763
1.617	3.11393	0.0553365
1.618	3.11927	0.0568014
1.619	3.12866	0.0548901
1.62	3.13339	0.0513115
1.621	3.14084	0.0535015
1.622	3.14219	0.0543469
1.623	3.14436	0.0555799
1.624	3.15538	0.0539256
1.625	3.16572	0.0528266
1.626	3.16822	0.052825
1.627	3.15806	0.0537741
1.628	3.1501	0.0547448
1.629	3.1355	0.0549259
1.63	3.123	0.0559192
1.631	3.12125	0.0577773
1.632	3.12159	0.0586854
1.633	3.12496	0.0597712
1.634	3.1346	0.062368
1.635	3.13586	0.073464
1.636	3.15194	0.0776657
1.637	3.15828	0.076261
1.638	3.1644	0.0749808
1.639	3.17357	0.0691814
1.64	3.18016	0.0682249
1.641	3.18209	0.0694911
1.642	3.18214	0.0681006
1.643	3.18621	0.0681674
1.644	3.19535	0.0694042
1.645	3.19777	0.0708875
1.646	3.20416	0.0709118
1.647	3.20716	0.0738827
1.648	3.21325	0.0736861
1.649	3.22242	0.073811
1.65	3.22101	0.0784757
1.651	3.22262	0.0782782
1.652	3.2288	0.074479
1.653	3.23389	0.0707375
1.654	3.24456	0.0670844
1.655	3.2541	0.0636977
1.656	3.2505	0.0640036
1.657	3.25645	0.0609658
1.658	3.26872	0.0576087
1.659	3.26939	0.058451
1.66	3.27733	0.0601064
1.661	3.30487	0.0615928
1.662	3.30174	0.0610721
1.663	3.30253	0.0625273
1.664	3.30369	0.0615236
1.665	3.30617	0.0617958
1.666	3.29474	0.0581413
1.667	3.29129	0.060259
1.668	3.25983	0.0597265
1.669	3.23529	0.0614316
1.67	3.21587	0.0637533
1.671	3.22148	0.070058
1.672	3.23368	0.0758382
1.673	3.21444	0.0730169
1.674	3.21405	0.067847
1.675	3.20726	0.0657437
1.676	3.20161	0.0633665
1.677	3.19373	0.0615729
1.678	3.18768	0.0596674
1.679	3.18378	0.0593802
1.68	3.17806	0.0595738
1.681	3.17768	0.0601679
1.682	3.19049	0.0593491
1.683	3.17376	0.059157
1.684	3.16692	0.0605037
1.685	3.18174	0.0604755
1.686	3.17427	0.0609207
1.687	3.16462	0.0572404
1.688	3.16502	0.053215
1.689	3.15832	0.051845
1.69	3.1442	0.0528549
1.691	3.13265	0.0573199
1.692	3.12829	0.062491
1.693	3.12932	0.0680044
1.694	3.1354	0.0740645
1.695	3.15674	0.0776832
1.696	3.16573	0.0748086
1.697	3.17952	0.0794023
1.698	3.19058	0.0824081
1.699	3.19829	0.0859576
1.7	3.20283	0.0831552
1.701	3.2045	0.0810806
1.702	3.20586	0.0791895
1.703	3.21894	0.0761528
1.704	3.213	0.0716583
1.705	3.20909	0.0653928
1.706	3.19959	0.061697
1.707	3.1932	0.0567723
1.708	3.19679	0.0545185
1.709	3.19941	0.0528345
1.71	3.20662	0.0510091
1.711	3.19904	0.0519369
1.712	3.19117	0.0538848
1.713	3.18167	0.062047
1.714	3.17405	0.0599851
1.715	3.15632	0.0582555
1.716	3.15424	0.0601022
1.717	3.13971	0.0636201
1.718	3.13696	0.0658727
1.719	3.13271	0.0660655
1.72	3.1451	0.0668886
1.721	3.15711	0.0705296
1.722	3.16345	0.0722871
1.723	3.16966	0.078136
1.724	3.16383	0.0738443
1.725	3.16183	0.0708063
1.726	3.16719	0.0703695
1.727	3.1712	0.0698899
1.728	3.1769	0.0697983
1.729	3.18212	0.0673315
1.73	3.19244	0.0659156
1.731	3.18776	0.0633747
1.732	3.17843	0.0615207
1.733	3.17764	0.061937
1.734	3.17635	0.060435
1.735	3.16313	0.064954
1.736	3.14872	0.0673179
1.737	3.12064	0.0696696
1.738	3.09955	0.0748954
1.739	3.09903	0.0803524
1.74	3.10877	0.0760156
1.741	3.12527	0.0706093
1.742	3.174	0.0479203
1.743	3.1929	0.0474337
1.744	3.20007	0.051023
1.745	3.21254	0.0613943
1.746	3.21689	0.0741524
1.747	3.22239	0.074896
1.748	3.23002	0.0733072
1.749	3.21931	0.0776914
1.75	3.20738	0.0693773
1.751	3.20951	0.0646349
1.752	3.19683	0.0691742
1.753	3.1849	0.076211
1.754	3.1966	0.0728767
1.755	3.21317	0.0744914
1.756	3.18828	0.0738033
1.757	3.19238	0.0707768
1.758	3.18773	0.0685326
1.759	3.18664	0.0675585
1.76	3.18495	0.0628163
1.761	3.19782	0.058583
1.762	3.20594	0.0586476
1.763	3.18738	0.057144
1.764	3.16585	0.056272
1.765	3.14739	0.0570203
1.766	3.13456	0.0564017
1.767	3.12626	0.0569437
1.768	3.12018	0.0577914
1.769	3.11464	0.057329
1.77	3.11345	0.0580034
1.771	3.09732	0.0572654
1.772	3.09224	0.0570098
1.773	3.06822	0.0606956
1.774	3.0638	0.0606208
1.775	3.06182	0.0587586
1.776	3.05803	0.0575269
1.777	3.05941	0.0571461
1.778	3.05498	0.0598254
1.779	3.06359	0.0581262
1.78	3.08295	0.0532923
1.781	3.09881	0.0525825
1.782	3.11482	0.0518227
1.783	3.12133	0.0516831
1.784	3.12907	0.0513589
1.785	3.1439	0.0523055
1.786	3.15542	0.0533803
1.787	3.17001	0.0544985
1.788	3.19407	0.0546648
1.789	3.21186	0.0566183
1.79	3.21553	0.0591977
1.791	3.20452	0.065775
1.792	3.2257	0.0691111
1.793	3.22275	0.066812
1.794	3.22231	0.067225
1.795	3.20575	0.0638764
1.796	3.19993	0.06233
1.797	3.21475	0.064577
1.798	3.21575	0.0672206
1.799	3.2087	0.0706347
1.8	3.18619	0.0593525
1.801	3.16929	0.0555065
1.802	3.15796	0.0563197
1.803	3.14437	0.0561173
1.804	3.15434	0.0555657
1.805	3.1433	0.055151
1.806	3.13794	0.0550513
1.807	3.13803	0.0558143
1.808	3.13384	0.0584793
1.809	3.12983	0.0621747
1.81	3.11583	0.0631379
1.811	3.12591	0.0607021
1.812	3.1189	0.0618937
1.813	3.14327	0.0617471
1.814	3.14548	0.0638874
1.815	3.15176	0.0637193
1.816	3.16347	0.0628703
1.817	3.18425	0.0588916
1.818	3.19738	0.0614965
1.819	3.18095	0.0568733
1.82	3.16699	0.0563626
1.821	3.15613	0.0578886
1.822	3.1274	0.0602712
1.823	3.12169	0.0583828
1.824	3.11562	0.0565279
1.825	3.10905	0.0536224
1.826	3.10542	0.0535888
1.827	3.09036	0.0541699
1.828	3.08418	0.0584515
1.829	3.10388	0.0525039
1.83	3.07768	0.0618311
1.831	3.08463	0.0586619
1.832	3.08164	0.0550977
1.833	3.1161	0.054935
1.834	3.1126	0.0547558
1.835	3.10899	0.054232
1.836	3.12024	0.0553986
1.837	3.12951	0.0572359
1.838	3.11571	0.0575601
1.839	3.10127	0.0597202
1.84	3.10492	0.0622387
1.841	3.10576	0.0632427
1.842	3.0993	0.0638892
1.843	3.07765	0.0569082
1.844	3.05488	0.0530736
1.845	3.05918	0.0501677
1.846	3.05705	0.0496064
1.847	3.06839	0.0465752
1.848	3.08537	0.0437421
1.849	3.08994	0.0440294
1.85	3.1149	0.0454042
1.851	3.11444	0.0456402
1.852	3.12975	0.0452014
1.853	3.14052	0.0473803
1.854	3.14687	0.0514196
1.855	3.14366	0.0475444
1.856	3.16247	0.046102
1.857	3.17416	0.0475441
1.858	3.18194	0.0499271
1.859	3.1772	0.0562607
1.86	3.18114	0.0550998
1.861	3.19912	0.0529609
1.862	3.19477	0.0509113
1.863	3.19027	0.0515799
1.864	3.17152	0.0547972
1.865	3.16679	0.0558288
1.866	3.16138	0.059353
1.867	3.15474	0.0585575
1.868	3.14313	0.0617014
1.869	3.13648	0.0612164
1.87	3.13086	0.05726
1.871	3.13553	0.0537436
1.872	3.12266	0.0538972
1.873	3.11191	0.0544994
1.874	3.0749	0.0569381
1.875	3.09988	0.0567623
1.876	3.09662	0.057492
1.877	3.11255	0.0557437
1.878	3.10096	0.0570137
1.879	3.09875	0.0550774
1.88	3.10849	0.0517463
1.881	3.10788	0.0500371
1.882	3.11253	0.0503385
1.883	3.10788	0.0537444
1.884	3.12124	0.0505874
1.885	3.10805	0.0507889
1.886	3.1095	0.0516555
1.887	3.09916	0.0552173
1.888	3.10859	0.0531359
1.889	3.10682	0.0531801
1.89	3.10758	0.053825
1.891	3.11655	0.0531453
1.892	3.12182	0.0533991
1.893	3.12514	0.0529247
1.894	3.11232	0.0471827
1.895	3.12285	0.0466168
1.896	3.11756	0.0474903
1.897	3.13336	0.0483636
1.898	3.15031	0.0512513
1.899	3.11672	0.0635862
1.9	3.12794	0.0703861
1.901	3.12867	0.0694728
1.902	3.13829	0.0688867
1.903	3.13017	0.0646327
1.904	3.12466	0.0641788
1.905	3.12995	0.0654577
1.906	3.1254	0.0702005
1.907	3.11244	0.0685813
1.908	3.10462	0.0653841
1.909	3.10194	0.0702293
1.91	3.07816	0.0726256
1.911	3.08097	0.0708147
1.912	3.0836	0.071578
1.913	3.08601	0.0722455
1.914	3.10047	0.0729715
1.915	3.09569	0.0721339
1.916	3.09199	0.0706324
1.917	3.08164	0.0697162
1.918	3.07106	0.0692131
1.919	3.07032	0.0678313
1.92	3.06913	0.0670147
1.921	3.06344	0.0645034
1.922	3.06085	0.0613488
1.923	3.04663	0.0590463
1.924	3.04155	0.0572027
1.925	3.04915	0.0554626
1.926	3.0518	0.0562889
1.927	3.05119	0.0559698
1.928	3.05055	0.0551244
1.929	3.05753	0.056672
1.93	3.05285	0.0555529
1.931	3.04115	0.0556509
1.932	3.03687	0.0556087
1.933	3.04973	0.0577907
1.934	3.03937	0.055851
1.935	3.04984	0.0561971
1.936	3.06825	0.0552456
1.937	3.07143	0.0597373
1.938	3.06531	0.0555905
1.939	3.06511	0.0579992
1.94	3.06442	0.058318
1.941	3.09849	0.0601141
1.942	3.10148	0.0594667
1.943	3.1097	0.0595526
1.944	3.12342	0.0592004
1.945	3.13456	0.059846
1.946	3.14579	0.0617816
1.947	3.15743	0.0638287
1.948	3.15727	0.0635596
1.949	3.1625	0.0588339
1.95	3.17902	0.0551745
1.951	3.17809	0.0497113
1.952	3.17215	0.0460753
1.953	3.15993	0.0480116
1.954	3.15418	0.0492221
1.955	3.14831	0.0517307
1.956	3.15144	0.0540407
1.957	3.16744	0.0578079
1.958	3.15827	0.0589158
1.959	3.15062	0.0628708
1.96	3.13944	0.0695811
1.961	3.12067	0.0751604
1.962	3.10412	0.0823341
1.963	3.0956	0.0721638
1.964	3.09793	0.0675258
1.965	3.10089	0.0585731
1.966	3.10945	0.0562269
1.967	3.10671	0.0598091
1.968	3.11028	0.0628042
1.969	3.11337	0.0654985
1.97	3.11022	0.0653573
1.971	3.102	0.0617287
1.972	3.08952	0.0569084
1.973	3.08346	0.0569827
1.974	3.07223	0.0583467
1.975	3.06355	0.0582224
1.976	3.06063	0.0563112
1.977	3.05895	0.0543295
1.978	3.06212	0.0534121
1.979	3.06285	0.0519237
1.98	3.06051	0.0515074
1.981	3.05659	0.0507547
1.982	3.05265	0.049969
1.983	3.04961	0.0485253
1.984	3.06088	0.049265
1.985	3.06364	0.049315
1.986	3.06895	0.0485996
1.987	3.06467	0.0480343
1.988	3.06012	0.0486029
1.989	3.06167	0.0498013
1.99	3.06872	0.0510156
1.991	3.05367	0.0529069
1.992	3.06159	0.0539633
1.993	3.07531	0.0551415
1.994	3.07136	0.0579341
1.995	3.09256	0.0561205
1.996	3.09475	0.0574231
1.997	3.08429	0.057863
1.998	3.07556	0.0586096
[truncated: 4,002 more rows]
