# Supplementary figures and images for: Mean ocean temperature change and decomposition of the benthic δ 18 O record over the past 4.5 million years
Source: Copernicus journal article supplement (doi:10.5194/cp-21-973-2025), 2025-06-03

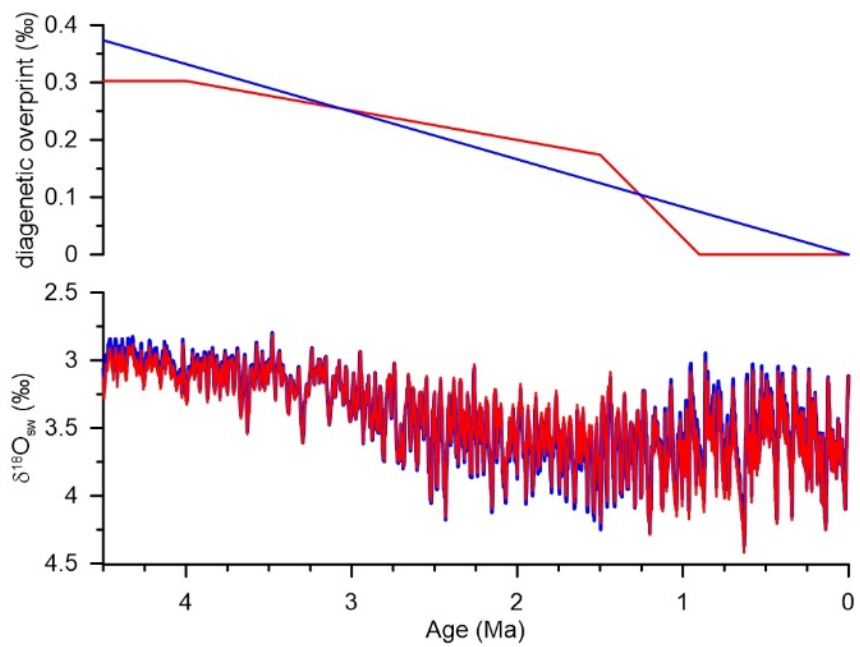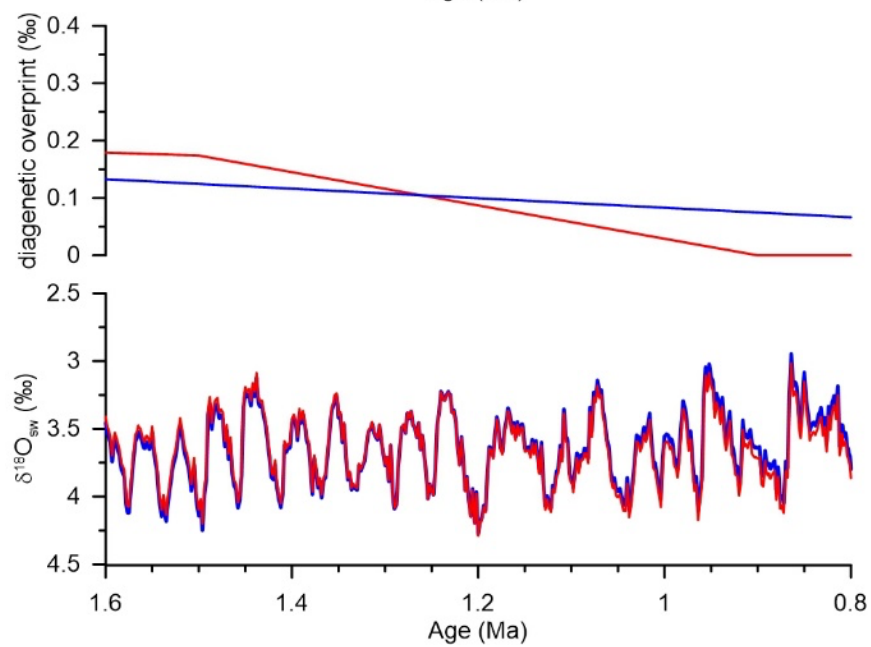

Supplement: Supplementary file 1 [file cp-21-973-2025-supplement.zip]

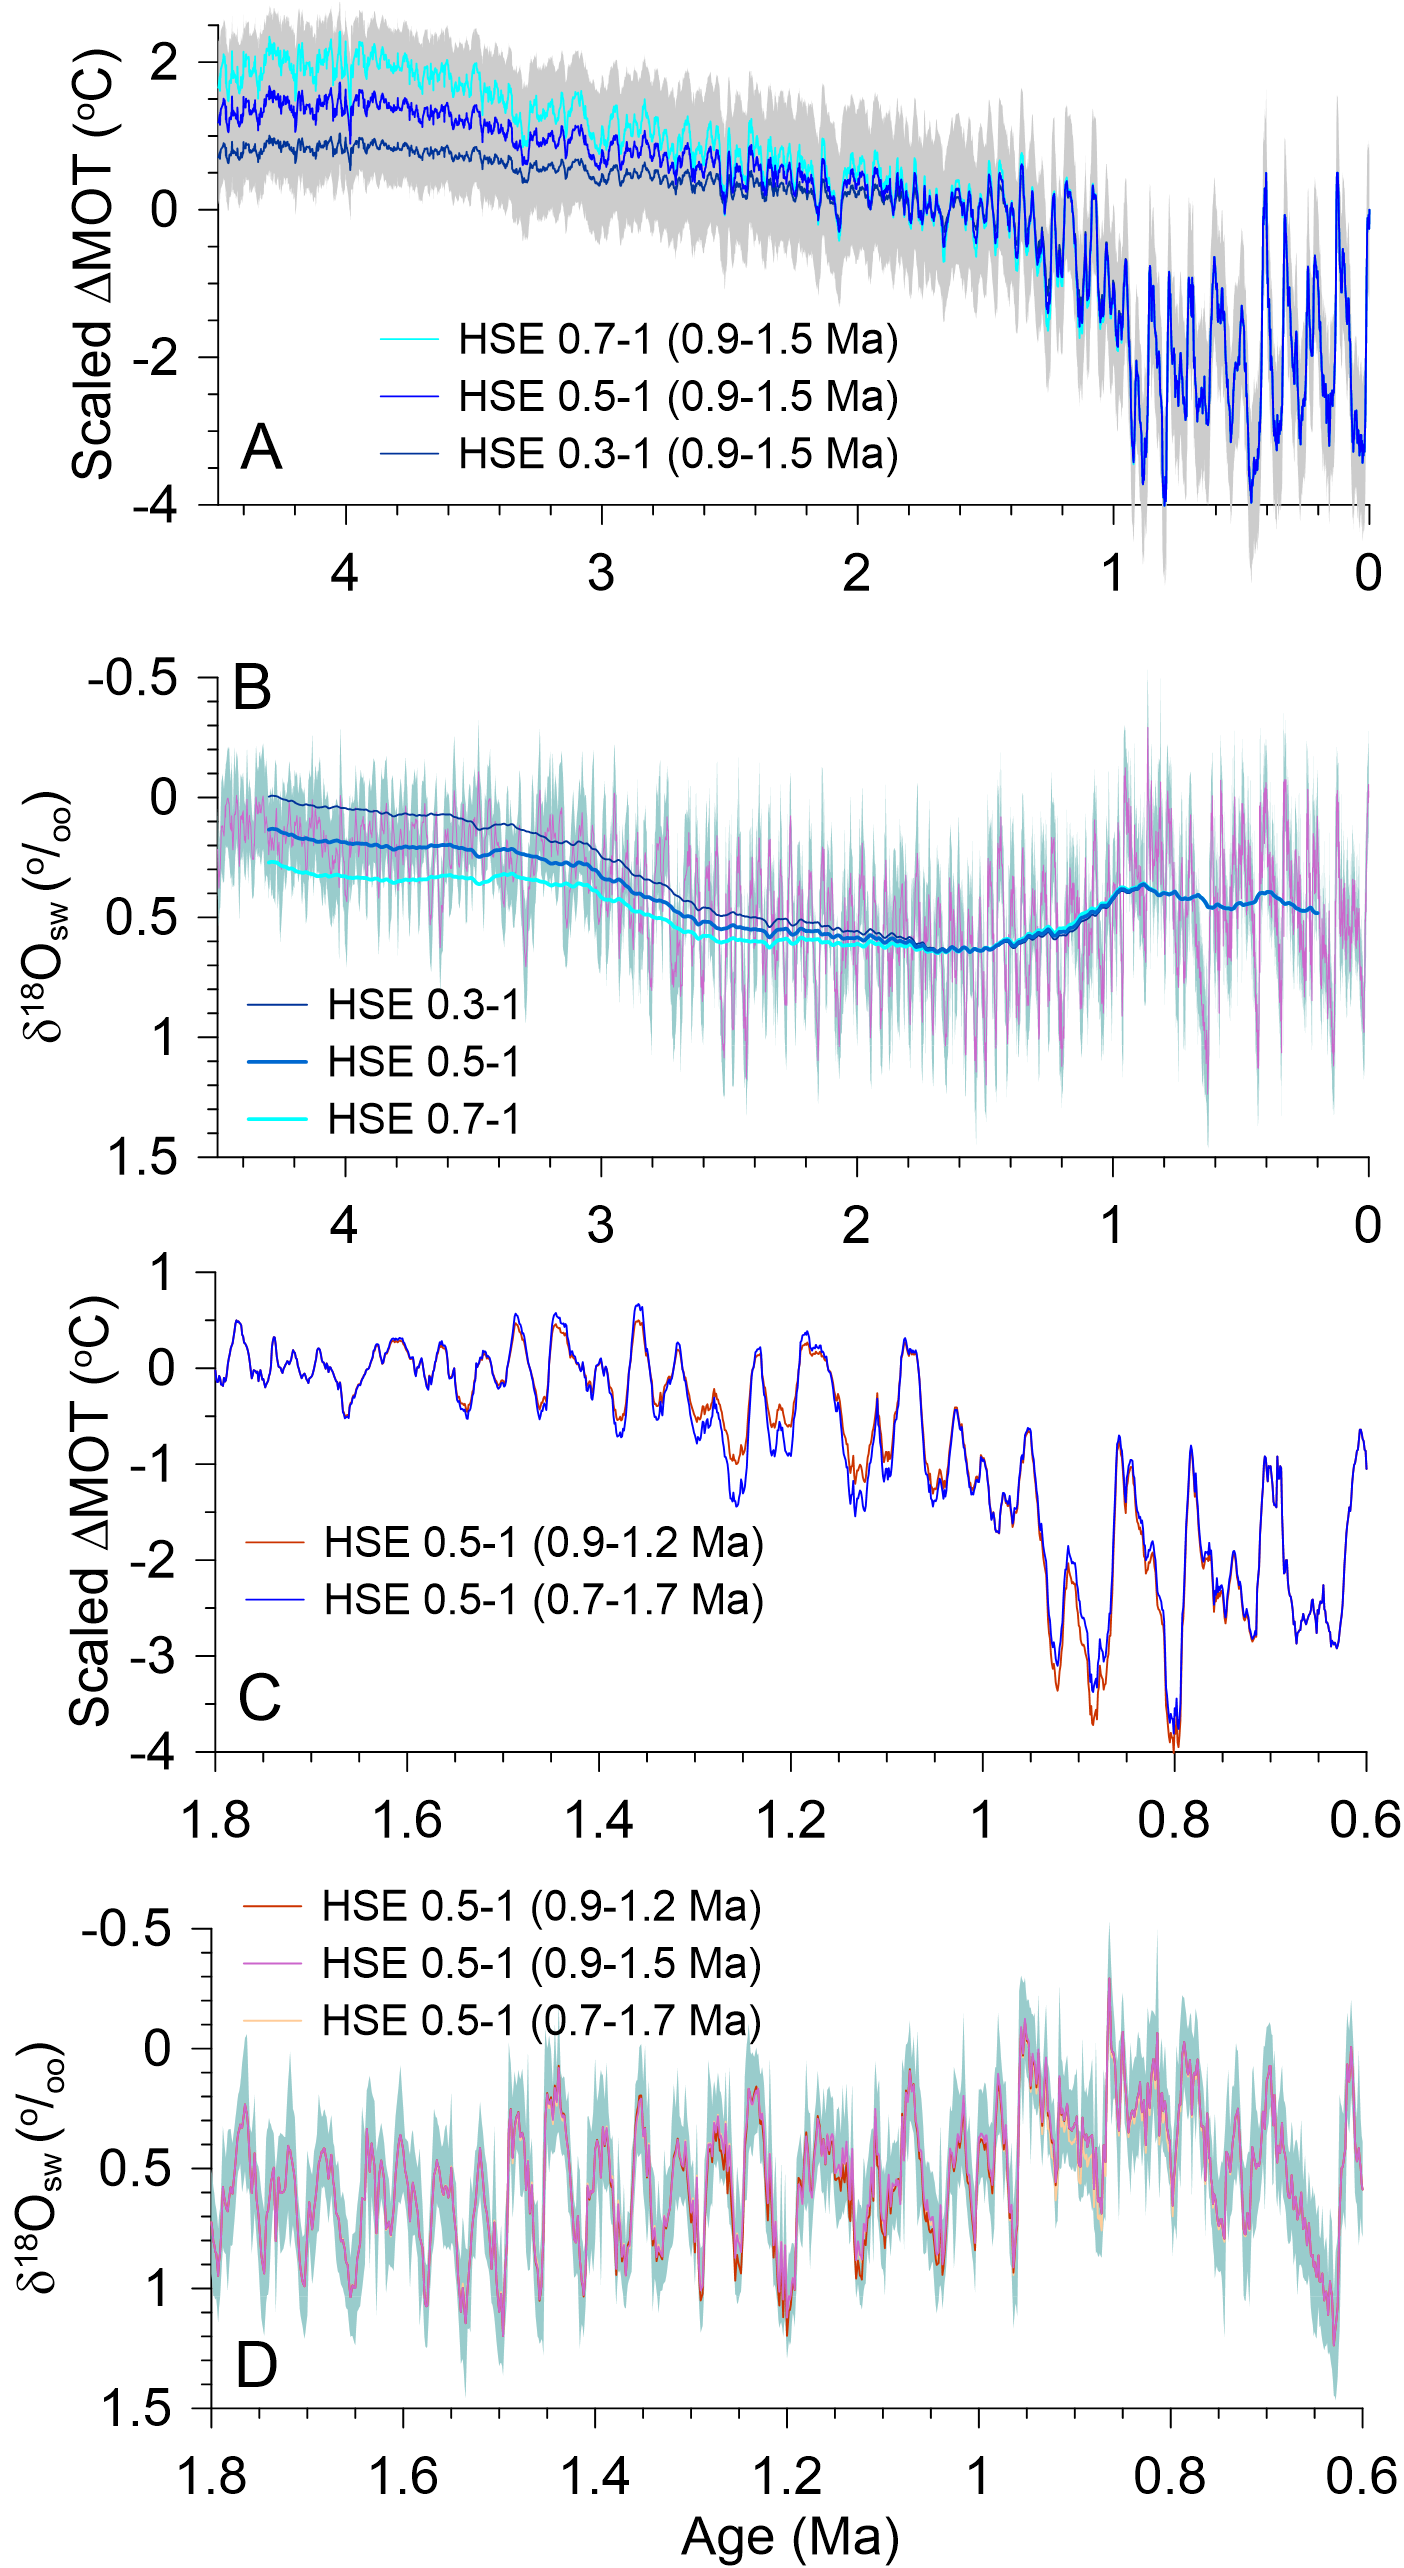

Supplement: Supplementary file 2 [file cp-21-973-2025-supplement.zip]

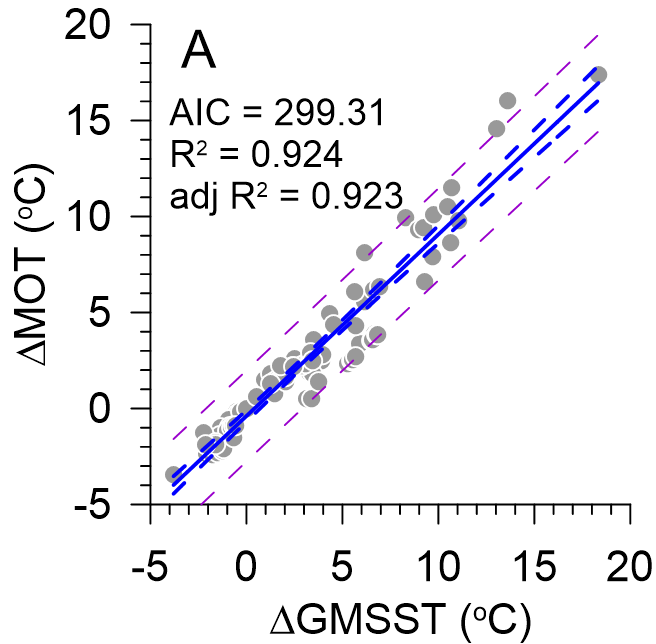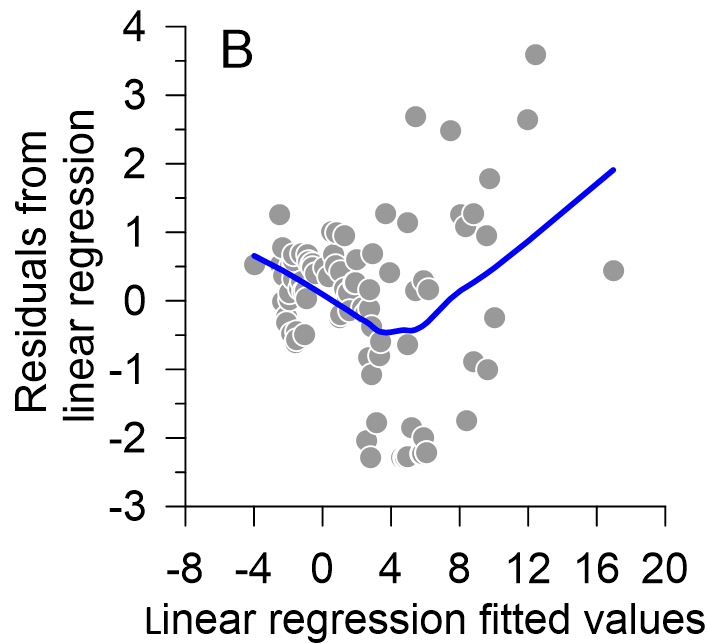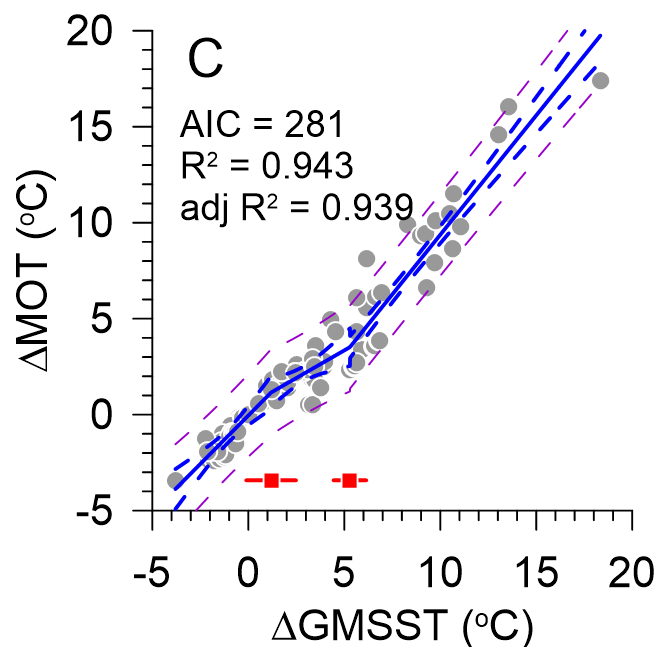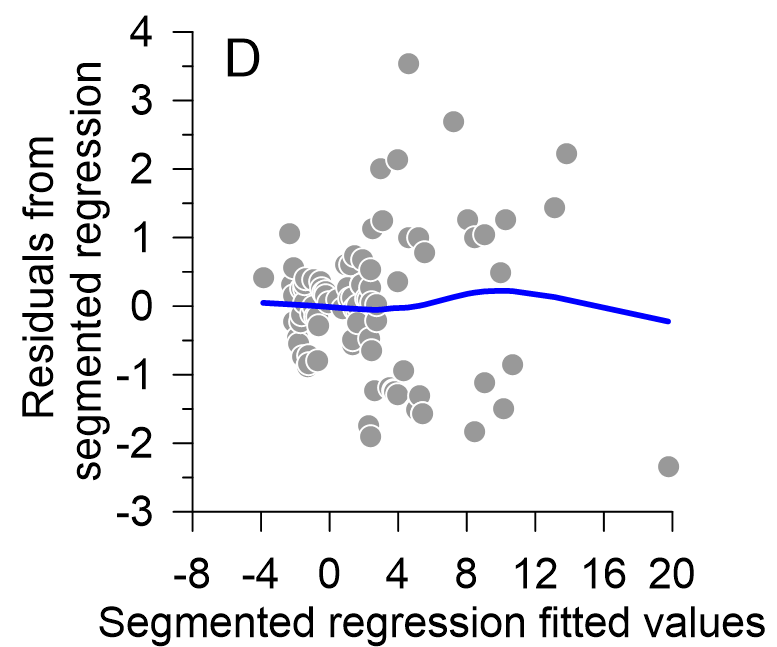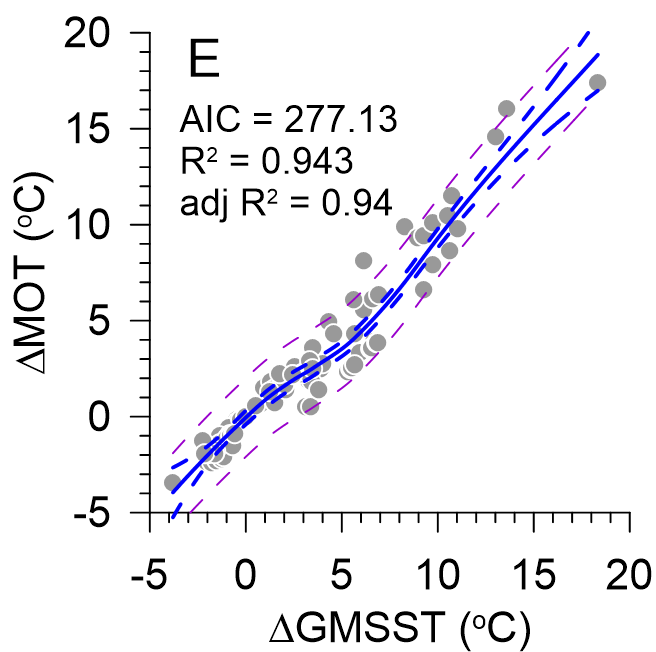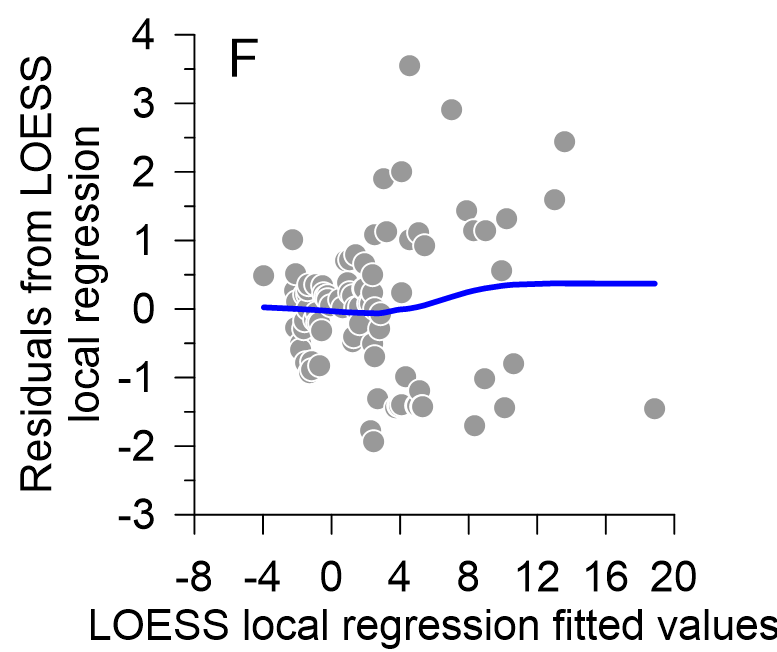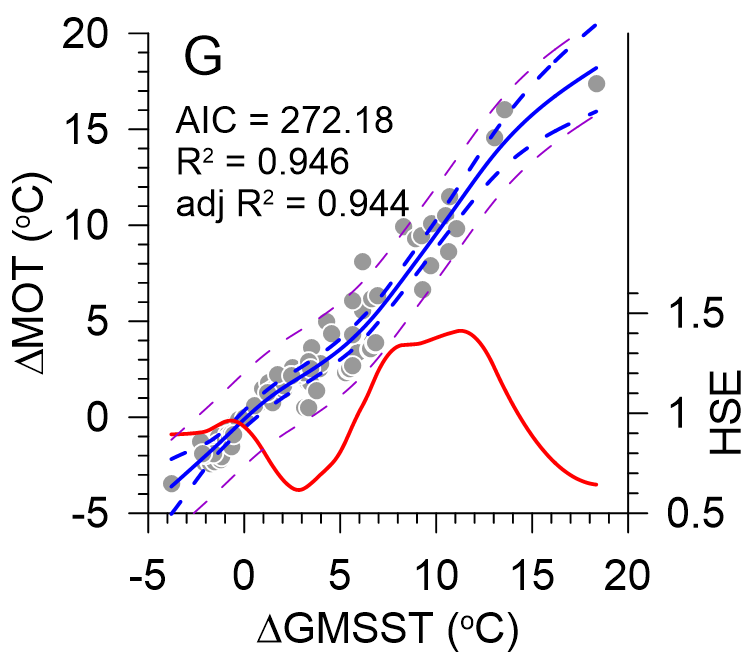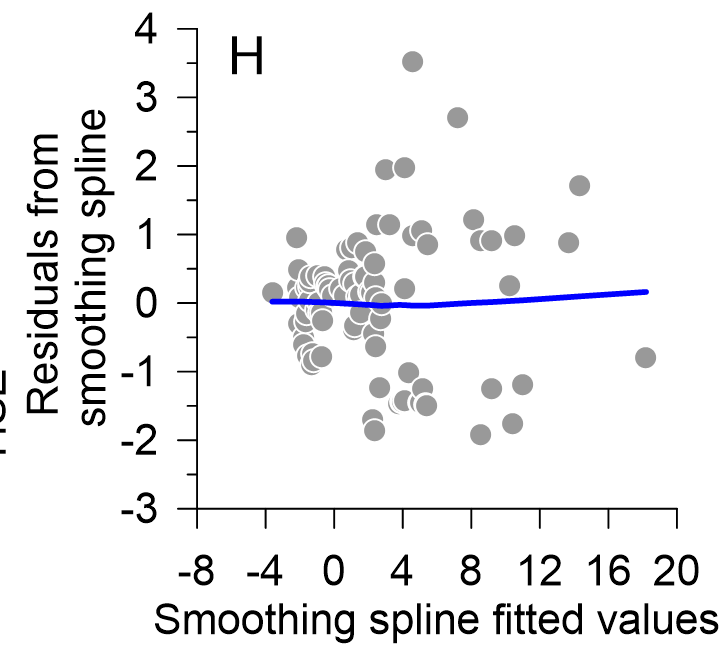

Supplement: Supplementary file 3 [file cp-21-973-2025-supplement.zip]
